# Supplementary material for: Comparison of the Efficiency of B–O and B–C Bond Formation Pathways in Borane-Catalyzed Carbene Transfer Reactions Using α-Diazocarbonyl Precursors: A Combined Density Functional Theory and Machine Learning Study
Source: PubMed Central journal article supplement (PMC11494835; doi:10.1021/acscatal.4c03368), 2024-09-16
Supplement: cs4c03368_si_001.pdf [file cs4c03368_si_001.pdf]

# Comparison of the Efficiency of B-O and B-C Bond Formation Pathways in Borane-Catalyzed Carbene Transfer Reactions using $\alpha$ -Diazocarbonyl Precursors: A Combined Density Functional Theory and Machine Learning Study

Kaveh Farshadfar,\* and Kari Laasonen\*

Department of Chemistry and Material Science, School of Chemical Engineering, Aalto University, 02150 Espoo, Finland

Email: Kaveh.Farshadfar@aalto.fi, Kari.Laasonen@aalto.fi

## Content:

**Benchmark calculations for key structures** (page S2)

**Figure S1.** DFT-computed pathways for the  $\text{BCl}_3$ -catalyzed  $\text{N}_2$  release of phenyldiazoacetate (**1**) and 2-diazo-1,2-diphenylmethane-1-one (**13**). (page S3)

**Figure S2.** The efficiency of  $\text{BCl}_3$  as a catalyst in the  $\text{N}_2$  release from  $\alpha$ -diazocarbonyl compounds decorated with  $\text{R}_1$  and  $\text{R}_2$  via *path O*. (page S4)

**Figure S3.** The efficiency of  $\text{BCl}_3$  as a catalyst in the  $\text{N}_2$  release from  $\alpha$ -diazocarbonyl compounds decorated with  $\text{R}_1$  and  $\text{R}_2$  via *path C*. (page S5)

**Figure S4.** The overall catalytic efficiency of  $\text{BCl}_3$  in the  $\text{N}_2$  release from  $\alpha$ -diazocarbonyl compounds decorated with  $\text{R}_1$  and  $\text{R}_2$ . (page S6)

**Table S2.** Dataset examples. (page S7)

**Figure S5.** Plot of  $\Delta G^\ddagger_{\text{C}}$  vs  $\Delta G_{\text{B-O adduct}}$  for those samples with  $\Delta G_{\text{B-O adduct}} < 0$ . (page S8)

**HOMO Energy Level as a Descriptor** (page S8)

**Machine learning analysis** (page S9)

**Table S3.** The entire dataset of our study. (page S17)

**Table S4.** Cartesian coordinates and total energies for all of the calculated structures. (page S28)

### Benchmark calculations for key structures

We recalculated the key structures of the two studied reactions using the DFT methods M06, M06-D3, and wB97XD (Table S1). It should be noted that the M06 and M06-D3 methods did not converge to a stable geometry for intermediate **7**, suggesting that the transition states **TS<sub>1-7</sub>** and **TS<sub>7-5</sub>** collapse into a single concerted step. This implies that the dissociation of N<sub>2</sub> occurs simultaneously with the addition of borane. Additionally, although the free energies calculated using other DFT methods exhibit similar trends, the potential energy differences better pronounce the energy difference between the two competitive pathways.

Table S1. Relative free energies (in black) and potential energies (in blue) for key structures of the two studied reactions (Figures 2 and 3) calculated using SMD/method/def2-TZVP//SMD/method/6-31g(d).

| method | <b>2</b> | <b>TS<sub>2-3</sub></b> | <b>3</b> | <b>TS<sub>1-7</sub></b> | <b>7</b> | <b>TS<sub>7-5</sub></b> | <b>5</b> | <b>TS<sub>5-8</sub></b> | <b>14</b> | <b>TS<sub>13</sub></b> | <b>TS<sub>14-15</sub></b> |
|--------|----------|-------------------------|----------|-------------------------|----------|-------------------------|----------|-------------------------|-----------|------------------------|---------------------------|
| M06-2X | -4.6     | 21.3                    | 0.3      | 19.4                    | 17.4     | 18.1                    | -13.0    | 11.9                    | -13.0     | 27.0                   | 5.9                       |
|        | -19.0    | 10.3                    | -1.7     | 5.5                     | 2.2      | 5.3                     | -16.4    | -5.9                    | -24.7     | 13.7                   | -3.4                      |
| M06    | 6.4      | 33.8                    | 6.6      |                         |          | 32.2                    | -4.3     | 24.7                    | -0.2      | 41.1                   | 18.8                      |
|        | -9.8     | 19.2                    | 1.4      |                         |          | 17.3                    | -9.4     | 4.5                     | -16.4     | 25.8                   | 6.5                       |
| M06-D3 | -0.6     | 27.8                    | 3.0      |                         |          | 26.7                    | -8.6     | 15.5                    | -5.9      | 34.1                   | 13.0                      |
|        | -15.3    | 13.9                    | -2.6     |                         |          | 12.0                    | -13.3    | -4.5                    | -21.9     | 19.8                   | 1.0                       |
| wB97XD | 0.7      | 28.5                    | 2.5      | 27.1                    | 25.9     | 26.6                    | -11.9    | 15.1                    | -7.2      | 31.4                   | 12.8                      |
|        | -15.7    | 14.7                    | -1.7     | 11.0                    | 8.3      | 10.8                    | -17.4    | -4.3                    | -22.5     | 15.0                   | 0.4                       |

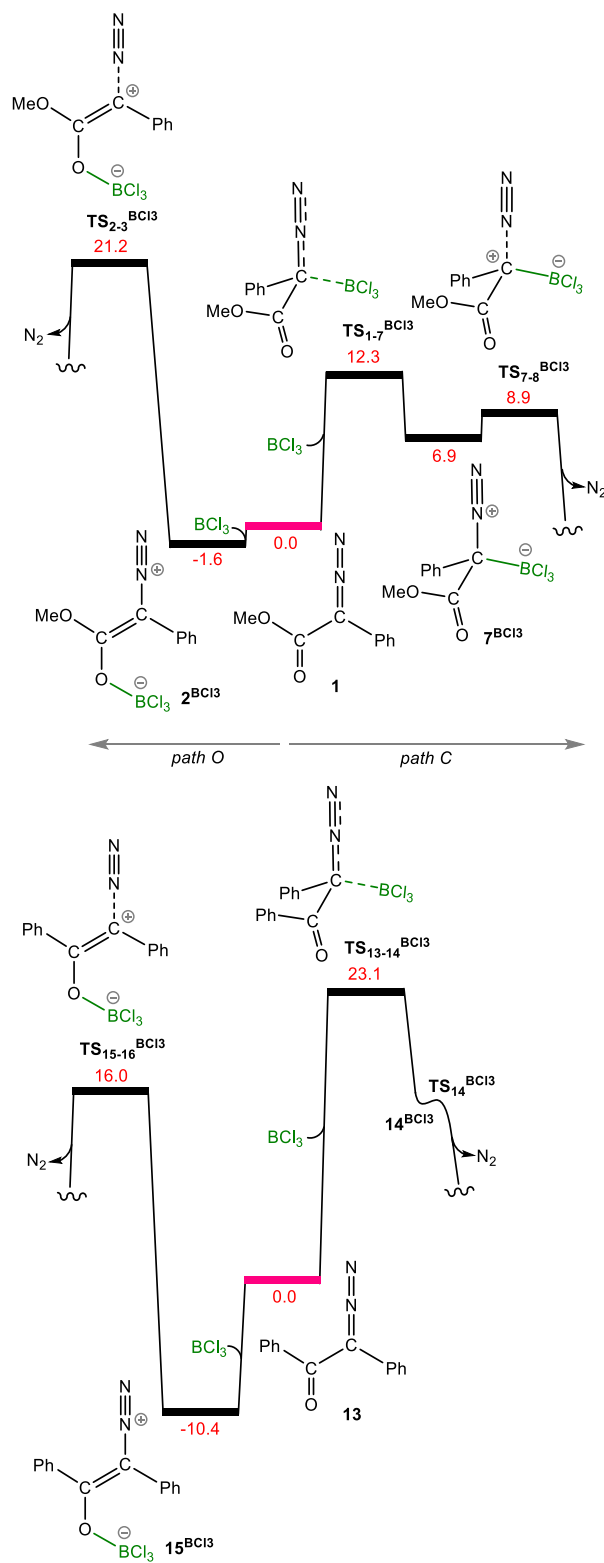

**Figure S1.** DFT-computed pathways for the  $\text{BCl}_3$ -catalyzed  $\text{N}_2$  release of phenyldiazoacetate (**1**) and 2-diazo-1,2-diphenylmethane-1-one (**13**)

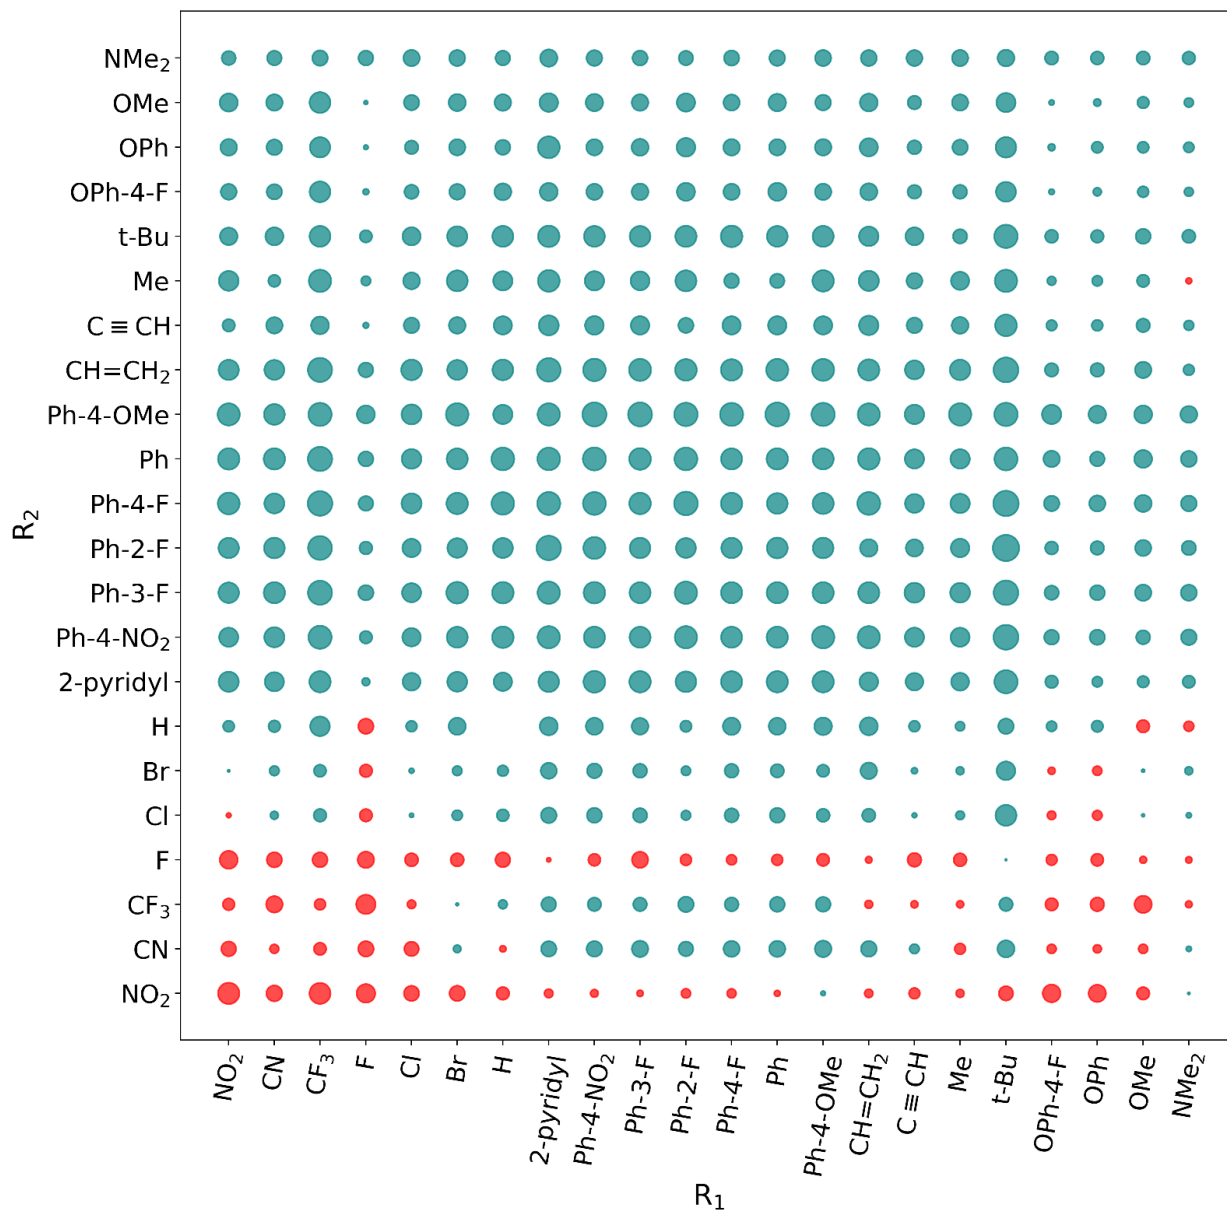

**Figure S2.** The efficiency of  $\text{BCl}_3$  as a catalyst in the  $\text{N}_2$  release from  $\alpha$ -diazocarbonyl compounds decorated with  $\text{R}_1$  and  $\text{R}_2$  via *path O*. The size of the teal circles corresponds to the efficiency in reducing the activation energy, while the red color indicates that  $\text{BCl}_3$  not only fails to act as a catalyst but also elevates the activation energy through *path O*.

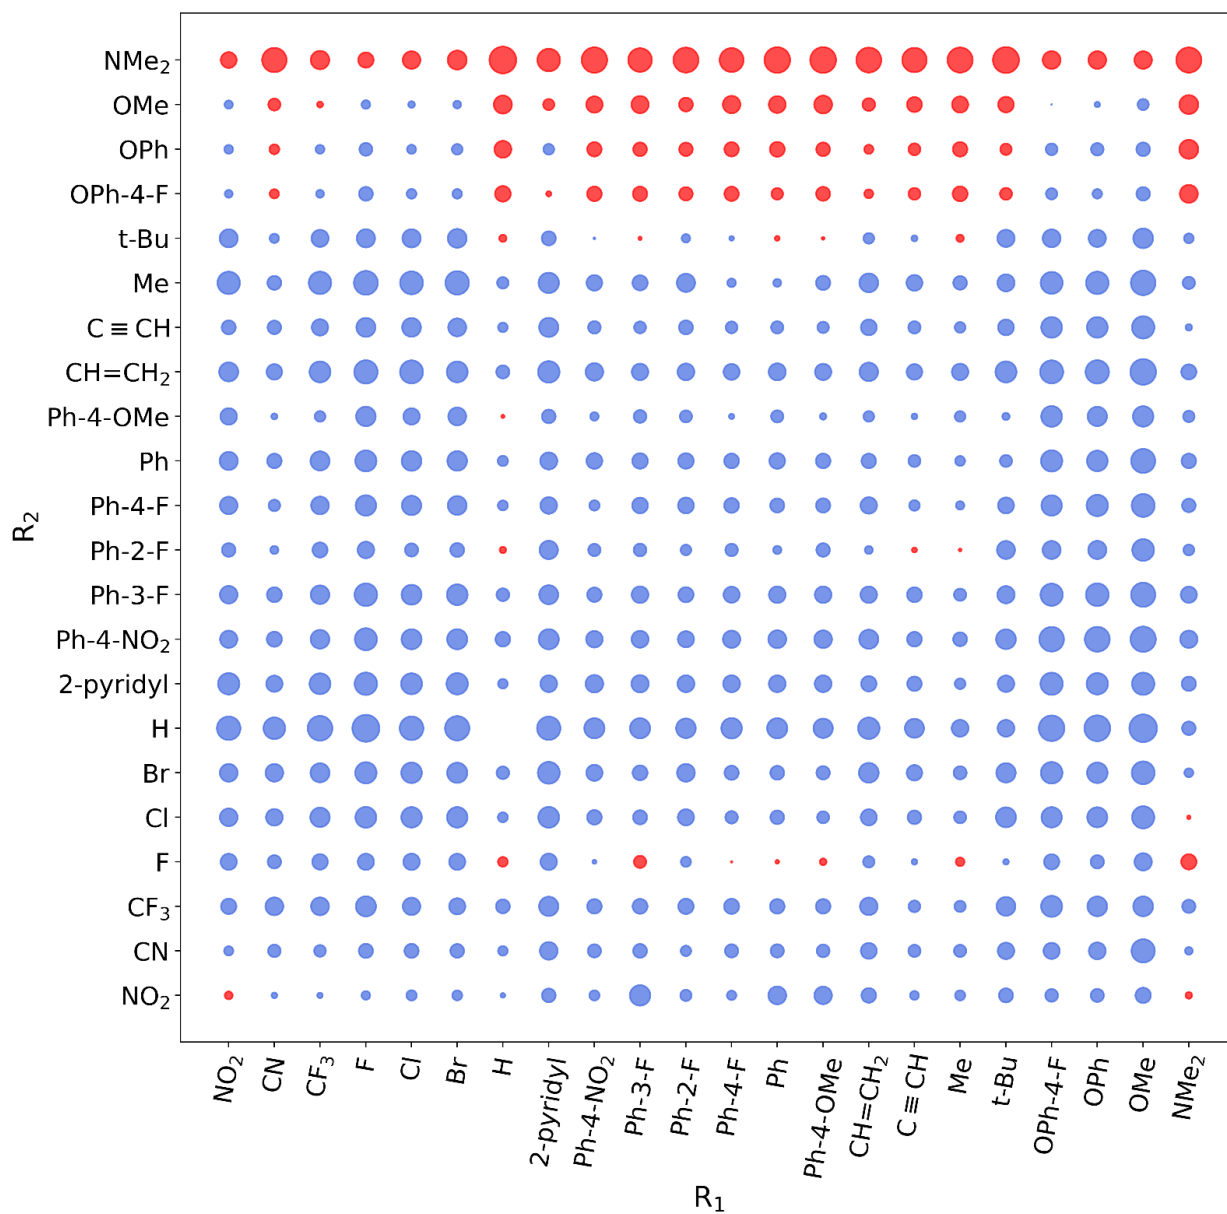

**Figure S3.** The efficiency of  $\text{BCl}_3$  as a catalyst in the  $\text{N}_2$  release from  $\alpha$ -diazocarbonyl compounds decorated with  $\text{R}_1$  and  $\text{R}_2$  via *path C*. The size of the blue circles corresponds to the efficiency in reducing the activation energy, while the red color indicates that  $\text{BCl}_3$  not only fails to act as a catalyst but also elevates the activation energy through *path C*.

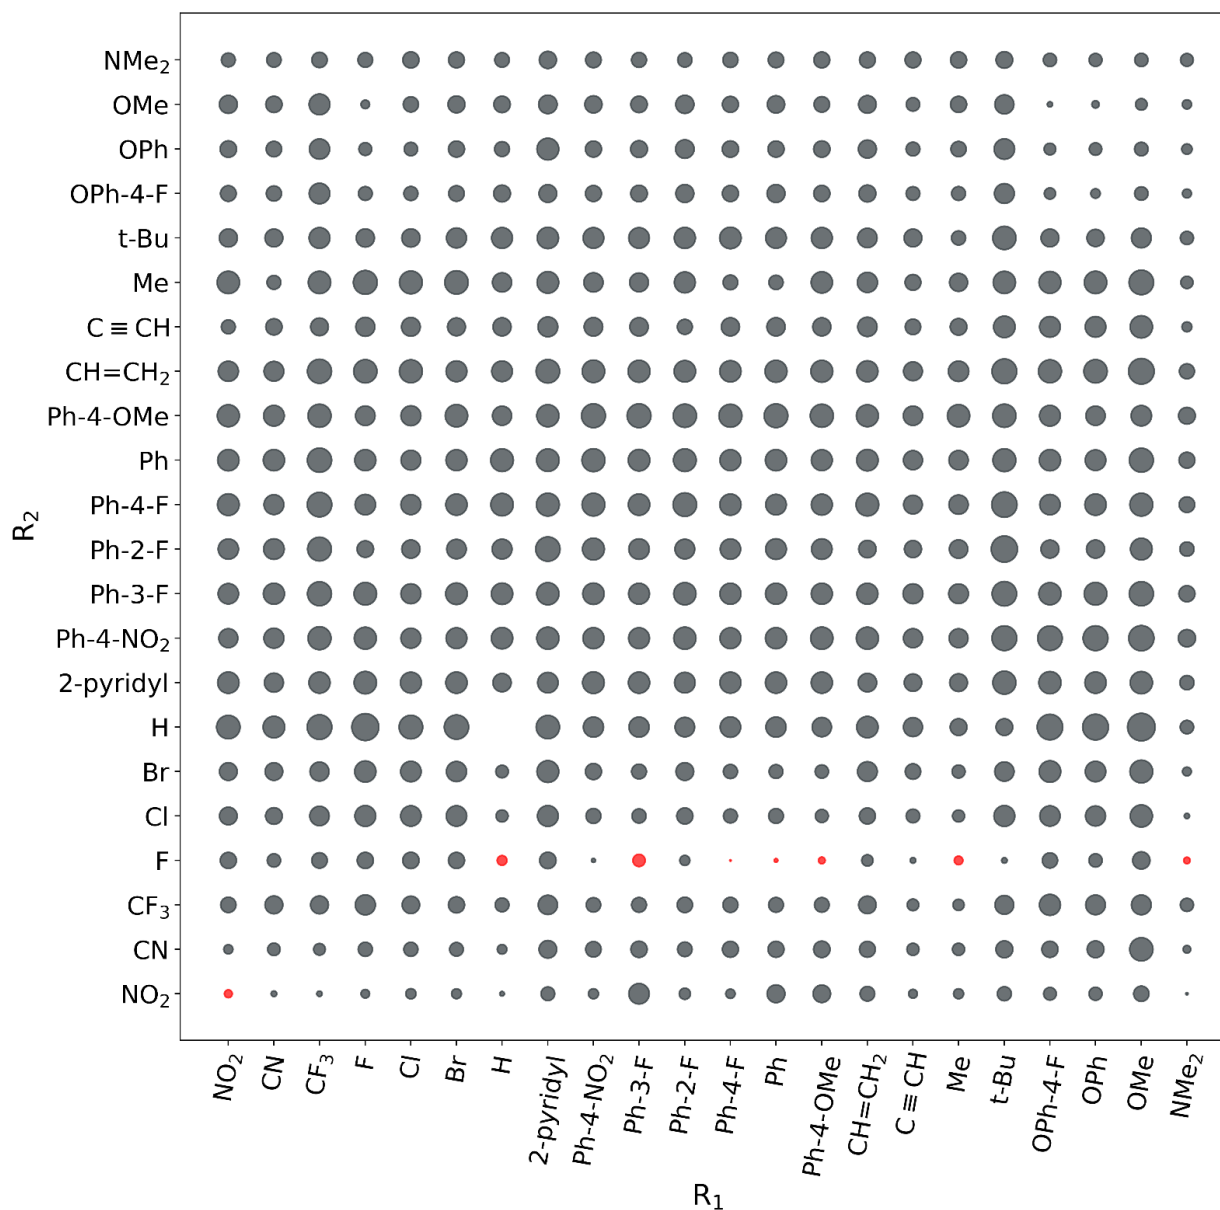

**Figure S4.** The overall catalytic efficiency of  $\text{BCl}_3$  in the  $\text{N}_2$  release from  $\alpha$ -diazocarbonyl compounds decorated with  $\text{R}_1$  and  $\text{R}_2$ . The size of the gray circles corresponds to the efficiency in reducing the activation energy, while the red color indicates that  $\text{BCl}_3$  not only fails to act as a catalyst but also elevates the activation energy.

**Table S2.** Dataset examples: i.e., free energy barrier of N<sub>2</sub> release (without BCl<sub>3</sub>, pathways C and O),  $\Delta G^\ddagger_c$  -  $\Delta G^\ddagger_o$ , relative stability of the B-O adduct, NPA charge on backbone carbons, and HOMO energy level for each diazo substrate.

| $R_2 \backslash R_1$                             | Me   |       | <sup>t</sup> Bu |       | F     |       | CF <sub>3</sub> |       | OMe   |       | NMe <sub>2</sub> |       | CH=CH <sub>2</sub> |       | C <sub>6</sub> H <sub>5</sub> |       | C <sub>6</sub> H <sub>4</sub> -4-NO <sub>2</sub> |       |
|--------------------------------------------------|------|-------|-----------------|-------|-------|-------|-----------------|-------|-------|-------|------------------|-------|--------------------|-------|-------------------------------|-------|--------------------------------------------------|-------|
| Me                                               | 30.7 | -17.9 | 32.3            | -10.8 | 33.3  | -2.8  | 32.6            | -2.2  | 32.9  | -4.2  | 32.2             | -17.6 | 33.8               | -11.2 | 28.0                          | -18.8 | 33.5                                             | -11.9 |
|                                                  | 21.0 | 0.54  | 15.3            | 0.56  | 30.1  | 0.89  | 15.6            | 0.43  | 27.6  | 0.81  | 33.5             | 0.68  | 19.9               | 0.50  | 20.9                          | 0.53  | 20.8                                             | 0.53  |
|                                                  | 25.8 | -0.10 | 22.3            | -0.10 | 13.8  | -0.16 | 15.4            | -0.11 | 12.3  | -0.13 | 27.0             | -0.10 | 21.6               | -0.09 | 25.8                          | -0.09 | 25.1                                             | -0.09 |
|                                                  | 4.8  | -7.61 | 7.0             | -7.57 | -16.2 | -8.04 | -0.2            | -8.08 | -15.3 | -7.62 | -6.5             | -7.38 | 1.8                | -7.64 | 4.9                           | -7.63 | 4.3                                              | -7.80 |
| <sup>t</sup> Bu                                  | 30.5 | -17.7 | 33.9            | -4.6  | 31.7  | -3.6  | 32.2            | -2.0  | 31.4  | -2.0  | 32.8             | -15.8 | 31.8               | -11.8 | 32.2                          | -13.8 | 31.8                                             | -12.1 |
|                                                  | 23.6 | 0.55  | 15.4            | 0.56  | 26.5  | 0.90  | 17.4            | 0.44  | 23.7  | 0.44  | 26.8             | 0.69  | 18.9               | 0.51  | 17.6                          | 0.54  | 17.1                                             | 0.53  |
|                                                  | 32.5 | -0.09 | 23.7            | -0.08 | 20.4  | -0.15 | 22.2            | -0.11 | 18.1  | -0.11 | 29.5             | -0.09 | 27.9               | -0.07 | 33.0                          | -0.08 | 31.7                                             | -0.08 |
|                                                  | 8.8  | -7.62 | 8.3             | -7.58 | -6.2  | -8.02 | 4.8             | -8.07 | -5.7  | -7.61 | 2.7              | -7.36 | 8.9                | -7.64 | 15.4                          | -7.64 | 14.6                                             | -7.79 |
| F                                                | 19.5 | -12.8 | 20.8            | -7.9  | 20.0  | 1.9   | 22.1            | 1.9   | 18.6  | -0.1  | 15.9             | -13.7 | 20.8               | -6.8  | 19.6                          | -8.4  | 19.6                                             | -6.5  |
|                                                  | 25.3 | 0.49  | 20.6            | 0.51  | 29.2  | 0.84  | 29.7            | 0.38  | 20.4  | 0.76  | 17.4             | 0.63  | 22.4               | 0.45  | 23.8                          | 0.48  | 24.6                                             | 0.48  |
|                                                  | 22.1 | 0.34  | 19.7            | 0.35  | 11.0  | 0.28  | 13.8            | 0.34  | 8.3   | 0.32  | 23.9             | 0.34  | 16.3               | 0.35  | 20.1                          | 0.35  | 19.0                                             | 0.35  |
|                                                  | -3.2 | -8.02 | -1.0            | -7.97 | -18.2 | -8.49 | -15.9           | -8.52 | -12.0 | -8.04 | 6.5              | -7.76 | -6.0               | -8.04 | -3.7                          | -8.03 | -5.7                                             | -8.20 |
| Cl                                               | 26.4 | -10.7 | 28.5            | 0.7   | 28.0  | 1.6   | 29.0            | 3.1   | 26.4  | 1.3   | 24.7             | -13.0 | 27.2               | -7.2  | 29.0                          | -8.0  | 29.6                                             | -6.4  |
|                                                  | 23.7 | 0.53  | 13.6            | 0.55  | 33.4  | 0.89  | 23.5            | 0.42  | 26.1  | 0.80  | 23.7             | 0.67  | 21.2               | 0.49  | 21.4                          | 0.52  | 21.9                                             | 0.52  |
|                                                  | 21.3 | -0.14 | 14.8            | -0.13 | 13.2  | -0.21 | 16.1            | -0.16 | 9.6   | -0.16 | 25.5             | -0.14 | 18.3               | -0.13 | 22.5                          | -0.13 | 22.2                                             | -0.14 |
|                                                  | -2.4 | -7.95 | 1.2             | -7.91 | -20.1 | -8.36 | -7.4            | -8.41 | -16.5 | -7.95 | 1.8              | -7.71 | -2.9               | -7.96 | 1.1                           | -7.96 | 0.4                                              | -8.12 |
| CF <sub>3</sub>                                  | 35.1 | -10.1 | 37.6            | 2.3   | 43.1  | 4.1   | 43.6            | 6.9   | 32.8  | -0.6  | 34.7             | -10.4 | 36.7               | -4.5  | 37.5                          | -5.6  | 38.3                                             | -3.9  |
|                                                  | 36.9 | 0.56  | 31.4            | 0.57  | 55.6  | 0.91  | 47.9            | 0.45  | 42.9  | 0.82  | 36.4             | 0.69  | 39.0               | 0.52  | 29.9                          | 0.55  | 32.1                                             | 0.54  |
|                                                  | 30.7 | -0.23 | 25.4            | -0.23 | 29.3  | -0.28 | 32.6            | -0.24 | 19.4  | -0.26 | 28.6             | -0.23 | 26.1               | -0.22 | 30.1                          | -0.23 | 31.0                                             | -0.22 |
|                                                  | -6.2 | -8.67 | -6.0            | -8.63 | -26.4 | -9.18 | -15.2           | -9.19 | -23.5 | -8.72 | -7.7             | -8.32 | -12.9              | -8.69 | 0.2                           | -8.64 | -1.1                                             | -8.84 |
| NO <sub>2</sub>                                  | 32.0 | -4.0  | 32.6            | 5.5   | 35.9  | 7.3   | 34.8            | 9.3   | 33.8  | 6.5   | 29.0             | -7.8  | 32.6               | -1.6  | 33.4                          | -2.5  | 33.7                                             | -0.4  |
|                                                  | 34.3 | 0.55  | 39.6            | 0.56  | 47.6  | 0.90  | 49.7            | 0.44  | 39.2  | 0.81  | 28.8             | 0.68  | 35.1               | 0.51  | 34.6                          | 0.54  | 35.8                                             | 0.54  |
|                                                  | 28.5 | 0.01  | 25.8            | 0.01  | 33.4  | -0.05 | 33.7            | -0.01 | 25.7  | -0.01 | 30.5             | 0.01  | 25.2               | 0.02  | 22.4                          | 0.01  | 30.2                                             | 0.01  |
|                                                  | -5.8 | -9.09 | -13.9           | -9.05 | -14.3 | -9.61 | -16.0           | -9.60 | -13.5 | -9.17 | 1.8              | -8.57 | -9.8               | -9.10 | -12.2                         | -8.77 | -5.7                                             | -9.24 |
| OMe                                              | 15.7 | -15.5 | 17.1            | -13.7 | 14.8  | -2.1  | 15.4            | -3.7  | 15.0  | -3.2  | 13.8             | -16.8 | 15.4               | -11.8 | 15.2                          | -12.8 | 14.6                                             | -11.0 |
|                                                  | 6.7  | 0.51  | 4.6             | 0.52  | 14.3  | 0.86  | 0.7             | 0.39  | 10.3  | 0.78  | 10.8             | 0.64  | 4.7                | 0.47  | 4.8                           | 0.50  | 4.3                                              | 0.49  |
|                                                  | 24.7 | 0.23  | 25.5            | 0.23  | 12.2  | 0.17  | 16.7            | 0.22  | 10.8  | 0.20  | 26.0             | 0.23  | 21.0               | 0.24  | 24.9                          | 0.23  | 23.8                                             | 0.23  |
|                                                  | 18.0 | -7.65 | 20.9            | -7.64 | -2.0  | -8.11 | 16.0            | -8.15 | 0.4   | -7.68 | 15.2             | -7.37 | 16.3               | -7.70 | 20.1                          | -7.71 | 19.4                                             | -7.87 |
| NMe <sub>2</sub>                                 | 9.9  | -18.3 | 9.3             | -18.1 | 8.3   | -3.2  | 7.5             |       | 8.9   | -9.2  | 11.0             | -22.2 | 7.9                | -17.0 | 8.0                           | -17.4 | 8.3                                              | -17.0 |
|                                                  | 0.9  | 0.53  | -0.2            | 0.55  | 0.8   | 0.88  | -0.6            | 0.42  | 2.8   | 0.80  | 5.3              | 0.67  | -0.7               | 0.49  | -0.3                          | 0.52  | -0.1                                             | 0.52  |
|                                                  | 31.3 | 0.05  | 32.3            | 0.09  | 16.4  | 0.01  | 19.1            | 0.06  | 19.3  | 0.05  | 32.5             | 0.07  | 29.1               | 0.09  | 30.4                          | 0.08  | 30.3                                             | 0.08  |
|                                                  | 30.4 | -7.64 | 32.5            | -7.29 | 15.6  | -8.14 | 19.8            | -8.06 | 16.6  | -7.54 | 27.3             | -7.23 | 29.8               | -7.35 | 30.7                          | -7.42 | 30.4                                             | -7.57 |
| CH=CH <sub>2</sub>                               | 33.4 | -13.5 | 35.3            | -5.9  | 34.5  | -0.7  | 34.8            | 1.4   | 34.6  | -1.9  | 34.7             | -15.3 | 34.1               | -10.6 | 34.7                          | -10.6 | 35.0                                             | -9.0  |
|                                                  | 19.1 | 0.56  | 14.4            | 0.57  | 27.1  | 0.91  | 15.0            | 0.44  | 25.4  | 0.82  | 30.6             | 0.69  | 18.9               | 0.52  | 18.2                          | 0.55  | 17.7                                             | 0.54  |
|                                                  | 24.1 | -0.13 | 20.2            | -0.13 | 15.9  | -0.18 | 19.9            | -0.14 | 12.1  | -0.15 | 26.9             | -0.13 | 22.4               | -0.12 | 24.7                          | -0.12 | 24.2                                             | -0.12 |
|                                                  | 5.0  | -7.37 | 5.8             | -7.34 | -11.1 | -7.70 | 4.9             | -7.74 | -13.3 | -7.36 | -3.8             | -7.17 | 3.5                | -7.39 | 6.6                           | -7.39 | 6.7                                              | -7.52 |
| C <sub>6</sub> H <sub>5</sub>                    | 29.5 | -16.2 | 30.3            | -12.7 | 30.1  | -1.8  | 30.3            | 0.1   | 32.0  | -1.6  | 33.5             | -14.4 | 29.9               | -11.4 | 31.5                          | -10.4 | 31.2                                             | -9.3  |
|                                                  | 16.7 | 0.56  | 12.4            | 0.57  | 22.5  | 0.91  | 10.2            | 0.44  | 21.2  | 0.82  | 24.8             | 0.69  | 14.1               | 0.52  | 16.0                          | 0.55  | 13.2                                             | 0.54  |
|                                                  | 26.1 | -0.10 | 25.3            | -0.09 | 14.9  | -0.15 | 17.8            | -0.10 | 12.3  | -0.12 | 26.2             | -0.09 | 22.6               | -0.08 | 23.1                          | -0.09 | 22.7                                             | -0.09 |
|                                                  | 9.4  | -7.25 | 12.9            | -7.22 | -7.6  | -7.50 | 7.5             | -7.56 | -8.9  | -7.20 | 1.4              | -7.02 | 8.5                | -7.26 | 7.0                           | -7.26 | 9.5                                              | -7.38 |
| C <sub>6</sub> H <sub>4</sub> -4-F               | 28.6 | -15.9 | 31.0            | -7.7  | 29.0  | -2.1  | 28.1            | -1.3  | 31.1  | -2.0  | 32.7             | -14.4 | 30.9               | -9.3  | 29.6                          | -11.4 | 30.4                                             | -9.4  |
|                                                  | 15.8 | 0.56  | 9.1             | 0.57  | 21.6  | 0.91  | 7.6             | 0.44  | 21.2  | 0.82  | 24.2             | 0.69  | 13.2               | 0.52  | 15.1                          | 0.55  | 12.6                                             | 0.54  |
|                                                  | 26.1 | -0.10 | 22.1            | -0.09 | 14.6  | -0.15 | 17.4            | -0.10 | 13.1  | -0.12 | 26.4             | -0.09 | 21.5               | -0.08 | 22.8                          | -0.09 | 26.7                                             | -0.09 |
|                                                  | 10.3 | -7.22 | 13.0            | -7.20 | -7.0  | -7.46 | 9.8             | -7.53 | -8.1  | -7.18 | 2.1              | -7.0  | 8.3                | -7.23 | 7.7                           | -7.22 | 14.1                                             | -7.35 |
| C <sub>6</sub> H <sub>4</sub> -4-OMe             | 29.7 | -14.1 | 27.9            | -13.6 | 28.3  | -1.0  | 25.5            | -5.7  | 27.9  | -4.2  | 31.1             | -15.3 | 27.5               | -12.3 | 29.4                          | -11.1 | 28.9                                             | -10.4 |
|                                                  | 12.7 | 0.56  | 9.5             | 0.57  | 17.3  | 0.91  | 7.2             | 0.44  | 17.0  | 0.82  | 21.4             | 0.69  | 10.9               | 0.51  | 10.1                          | 0.54  | 9.4                                              | 0.54  |
|                                                  | 25.8 | -0.09 | 26.1            | -0.09 | 15.2  | -0.15 | 21.5            | -0.10 | 13.6  | -0.11 | 26.6             | -0.09 | 23.6               | -0.08 | 24.2                          | -0.09 | 26.5                                             | -0.09 |
|                                                  | 13.1 | -6.84 | 16.6            | -6.83 | -2.1  | -7.04 | 14.3            | -7.10 | -3.4  | -6.81 | 5.1              | -6.67 | 12.7               | -6.86 | 14.0                          | -6.89 | 17.1                                             | -6.98 |
| C <sub>6</sub> H <sub>4</sub> -4-NO <sub>2</sub> | 31.4 | -13.3 | 34.8            | -4.7  | 33.6  | 0.1   | 33.5            | 2.6   | 34.1  | -0.7  | 36.5             | -12.6 | 34.0               | -7.6  | 34.5                          | -7.6  | 34.5                                             | -6.5  |
|                                                  | 19.1 | 0.56  | 13.8            | 0.58  | 28.2  | 0.92  | 15.4            | 0.45  | 27.4  | 0.83  | 28.2             | 0.69  | 17.1               | 0.52  | 19.2                          | 0.55  | 19.3                                             | 0.55  |
|                                                  | 24.8 | -0.10 | 21.5            | -0.10 | 17.0  | -0.16 | 21.5            | -0.11 | 12.3  | -0.12 | 26.3             | -0.10 | 21.4               | -0.09 | 23.6                          | -0.10 | 25.1                                             | -0.10 |
|                                                  | 5.7  | -7.62 | 7.7             | -7.60 | -11.2 | -7.90 | 6.1             | -7.96 | -15.0 | -7.59 | -1.9             | -7.38 | 4.3                | -7.62 | 4.4                           | -7.61 | 5.8                                              | -7.73 |
| 2-pyridyl                                        | 30.7 | -13.8 | 29.6            | -9.4  | 32.4  | -0.6  | 30.4            | -0.1  | 30.5  | -3.8  | 33.6             | -14.5 | 29.5               | -11.1 | 32.4                          | -9.6  | 32.1                                             | -7.9  |
|                                                  | 19.9 | 0.56  | 11.4            | 0.57  | 30.2  | 0.91  | 15.1            | 0.45  | 25.8  | 0.82  | 28.3             | 0.7   | 17.7               | 0.52  | 17.0                          | 0.55  | 16.0                                             | 0.55  |
|                                                  | 26.8 | -0.12 | 20.3            | -0.11 | 15.2  | -0.17 | 15.5            | -0.12 | 13.5  | -0.14 | 26.6             | -0.11 | 21.4               | -0.10 | 22.8                          | -0.12 | 21.5                                             | -0.12 |
|                                                  | 7.0  | -7.49 | 8.9             | -7.42 | -15.0 | -7.76 | 0.4             | -7.77 | -12.3 | -7.43 | -1.7             | -7.27 | 3.7                | -7.46 | 5.8                           | -7.50 | 5.5                                              | -7.63 |

black:  $\Delta G^\ddagger$  in absence of BCl<sub>3</sub>

blue:  $\Delta G^\ddagger_o$

green:  $\Delta G^\ddagger_c$

red:  $\Delta G^\ddagger_c - \Delta G^\ddagger_o$

pink:  $\Delta G_{B-O}$  adduct

amber: NPA charge on C (CO)

brown: NPA charge on C bound to N<sub>2</sub>

gray: HOMO energy

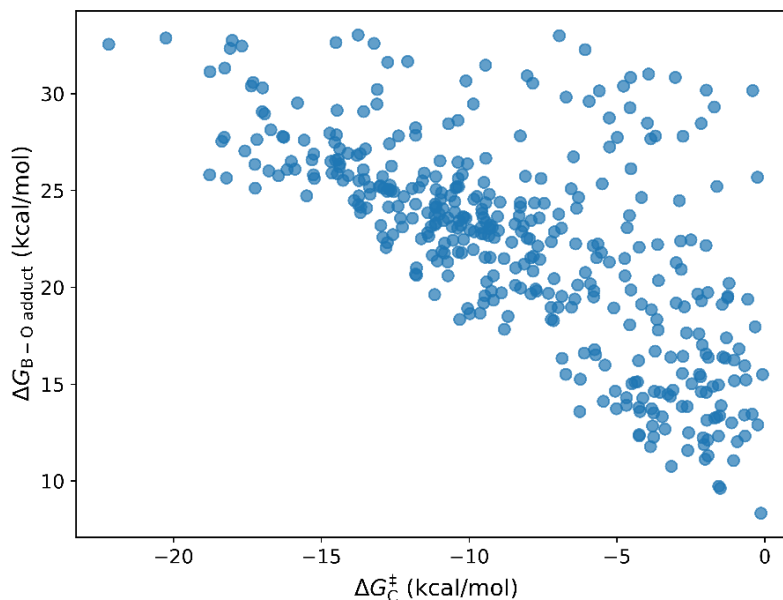

**Figure S5.** Plot of  $\Delta G^{\ddagger}_C$  vs  $\Delta G_{B-O \text{ adduct}}$  for those samples with  $\Delta G_{B-O \text{ adduct}} < 0$ .

### HOMO Energy Level as a Descriptor

The primary reason for selecting the HOMO energy level as a descriptor is that it serves as a quantitative indicator of the electron-withdrawing and electron-donating properties of the substituents on both sides of the diazo functionality, which exert differential influence on the two reaction pathways. Additionally, we have demonstrated in Figure 5 that there is a significant correlation between the HOMO energy level and the stability of the B-O adduct, a crucial intermediate that significantly influences the catalytic pathway selection. As depicted in Figure S5, the vacant boron p orbital interacts with the in-plane lone pair of electrons on oxygen ( $p_x$ ) in the B-O adduct, which is predominantly localized in lower-lying HOMOs. For most of the investigated samples, these oxygen lone pairs are located in HOMO-1, but not for all. In Figure S5, it can be observed that for some diazo substrates, this orbital is located in HOMO-2 or even HOMO-3. The higher the energy of this orbital, the more readily the lone pair can be donated from the diazo molecule to the boron atom. There exists a good linear correlation between the HOMO energy level and the MO energy level involved in the formation of the B-O adduct, regardless of which underlying layer the orbital is in, as evidenced by an  $R_2$  value of 0.86 for the examples shown in Figure S5. This indicates why the HOMO energy level can serve as a descriptor for  $\Delta\Delta G$ .



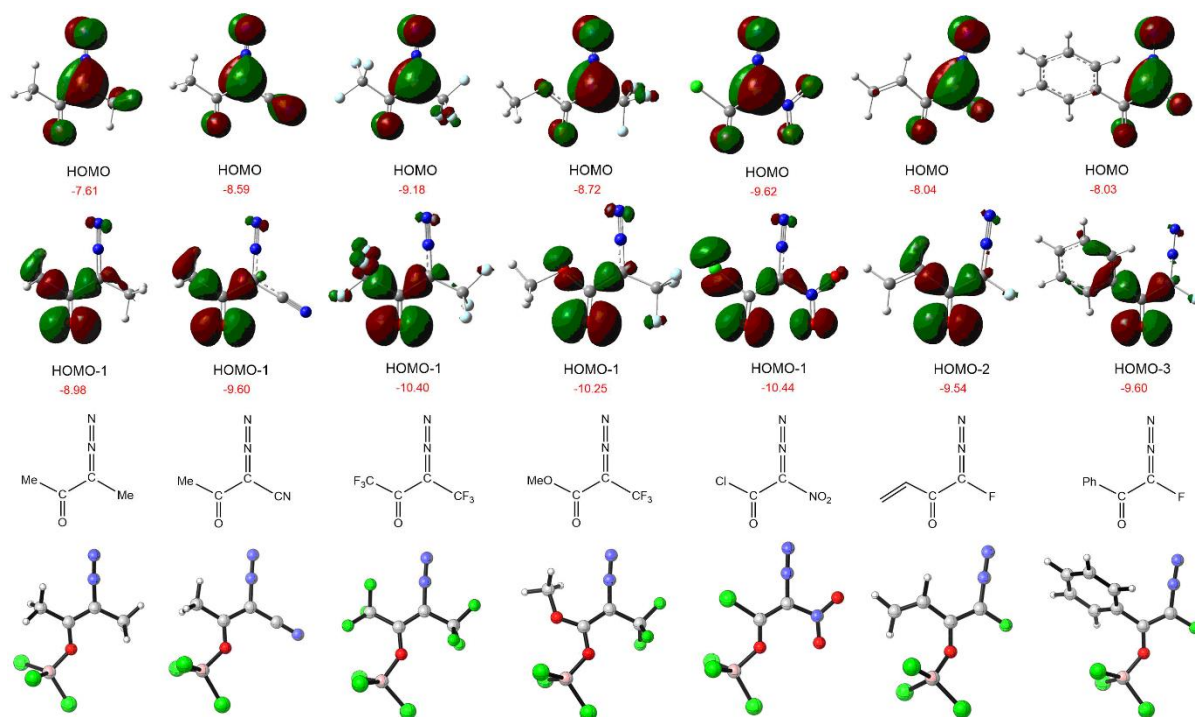

**Figure S6.** Spatial plots of the HOMO and the HOMO-*n* involved in B-O adduct formation for some examples from the studied dataset, along with 3D images of their corresponding B-O adducts.

## Machine learning analysis

In this study, we evaluated several machine learning models to predict  $\Delta\Delta G$  values, including Linear Regression, Decision Tree, Support Vector Machine, K-Nearest Neighbors, Gradient Boosting, Neural Network, and Random Forest. The performance metrics for these models in the initial training are summarized below:

**Linear Regression:** MAE: 4.730,  $R^2$ : 0.734

**Decision Tree:** MAE: 2.867,  $R^2$ : 0.880

**Support Vector Machine:** MAE: 5.565,  $R^2$ : 0.660

**K-Nearest Neighbors:** MAE: 3.631,  $R^2$ : 0.834

**Gradient Boosting:** MAE: 3.002,  $R^2$ : 0.907

**Neural Network:** MAE: 4.314,  $R^2$ : 0.820

**Random Forest:** MAE: 2.860,  $R^2$ : 0.904

Among these models, random forest and gradient boosting regression demonstrated strong performance. While gradient boosting achieved a slightly higher coefficient of determination ( $R^2$ ), random forest was ultimately selected due to its lower mean absolute error (MAE) and its robustness in handling complex, nonlinear relationships and its ability to mitigate overfitting through ensemble learning.

## Architecture of the Random Forest Regression Model:

- **Number of Trees:** 200
- **Minimum Samples to Split an Internal Node:** 2
- **Maximum Features Considered for Splitting:** Auto (square root of the number of features)
- **Minimum Samples at a Leaf Node:** 1
- **Out-of-Bag (OOB) Estimation:** Enabled
- **Random State:** Used for reproducibility
- **Cross-Validation:** 10-fold cross-validation for hyperparameter tuning

## Summary of Training, Validation, and Out-of-Bag Set Selection

To evaluate the performance of our Random Forest model, we implemented a robust scheme for selecting training, validation, and out-of-bag (OOB) sets. The process is as follows:

1. **Data Shuffling and Splitting:**
  - The entire dataset is first shuffled to ensure randomness.
  - The shuffled data is then split into two sets: 85% for training and 15% for testing. This split is achieved using the `train_test_split` function with a randomly chosen seed for reproducibility.
2. **Model Training with Cross-Validation and OOB Estimation:**
  - We initialize a `RandomForestRegressor` with `oob_score=True` to enable OOB error estimation.
  - Using `GridSearchCV`, we perform hyperparameter tuning with 10-fold cross-validation. This ensures that the model's performance is evaluated on different subsets of the training data, thus providing a robust assessment.
3. **Multiple Iterations for Robustness:**
  - To ensure the reliability of our results, the entire process (shuffling, splitting, training, and evaluating) is repeated 256 times with different random seeds.
  - This approach mitigates the impact of any single random train-test split and provides statistically significant performance metrics.
4. **Performance Metrics Collection:**
  - For each iteration, we predict the target values for the training, validation (test), and OOB sets.
  - We calculate the Mean Absolute Error (MAE) and  $R^2$  scores for each set and store these metrics.
5. **Summary of Metrics:**
  - After all iterations, we calculate the average and standard deviation of the MAE and  $R^2$  scores for the training, validation, and OOB sets.
  - These metrics provide a comprehensive view of the model's performance and its consistency across different data splits.

Our methodology ensures a thorough and unbiased evaluation of the Random Forest model, leveraging cross-validation and out-of-bag estimation to maximize the use of available data while maintaining rigorous performance assessment standards. This approach allows for robust model validation and reliable performance metrics reporting.

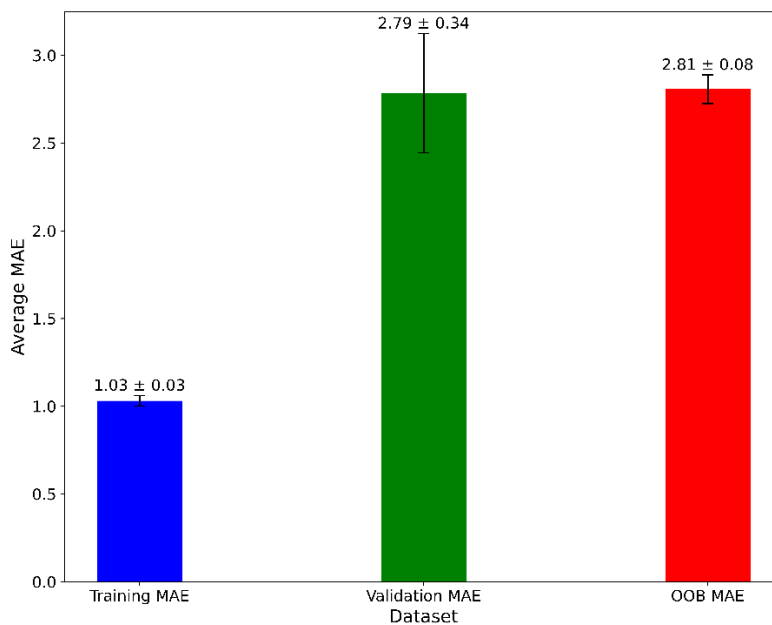

**Figure S6.** Mean Absolute Error (MAE) for training, validation, and out-of-bag sets after 256 model iterations. Error bars represent standard deviation.

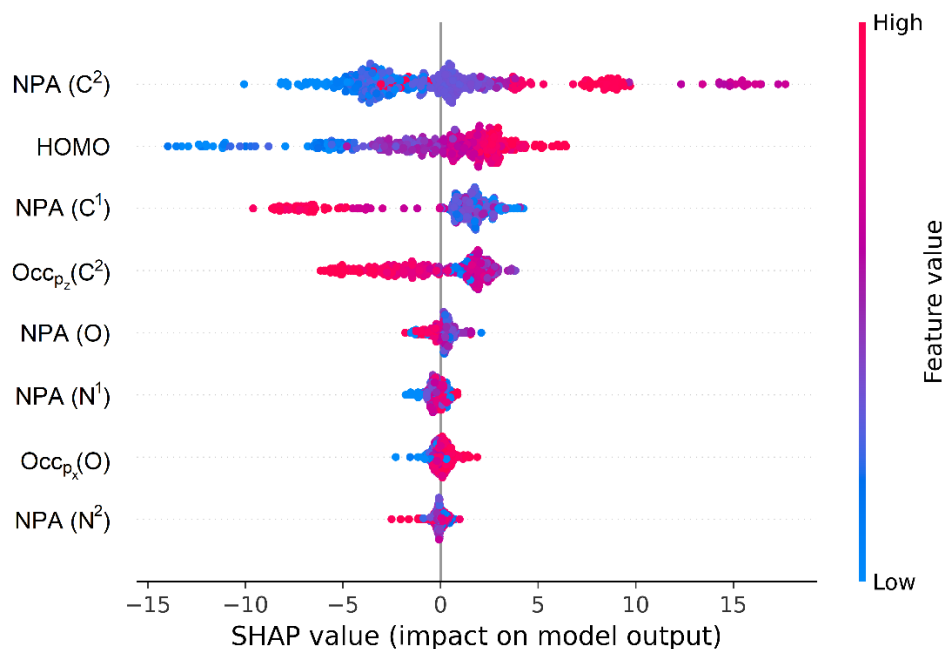

**Figure S7.** SHAP values for all DFT-based features obtained from a Random Forest regression model.

### Explaining a linear logistic regression model

SHAP analysis reveals key electronic features influencing pathway preference (Figure 7b, Figure S5). Figure S5a depicts the dependence plot for HOMO energy. A positive correlation is observed between the HOMO energy level of diazo substrates and their SHAP value. This suggests that substrates with lower (more negative) HOMO energies exhibit more negative  $\Delta\Delta G$  ( $\Delta G_c^\ddagger - \Delta G_o^\ddagger$ ) values, favoring path C. Each dot in the plot in this plot is colored based on the Natural Population Analysis (NPA) charge on the carbon bound to the diazo functionality (C<sup>2</sup>). Substrates with HOMO energies more stable than -8.3 eV, those bearing a more positive charge on C<sup>2</sup> tend to have more negative  $\Delta\Delta G$  values. The SHAP dependence plot for NPA charge on C<sup>2</sup> (Figure S5b) displays an inverted V-shape. This indicates that for a significant portion of the dataset, a more negative NPA charge on C<sup>2</sup> correlates with a more negative shift in  $\Delta\Delta G$ . However, no clear correlation is observed with HOMO energy levels. Finally, the SHAP dependence plot for NPA charge on C<sup>1</sup> (Figure S5c) reveals no clear dependence on the NPA charge of C<sup>2</sup>. However, it suggests that a more positive charge on C<sup>1</sup> leads to a more negative shift in  $\Delta\Delta G$ .

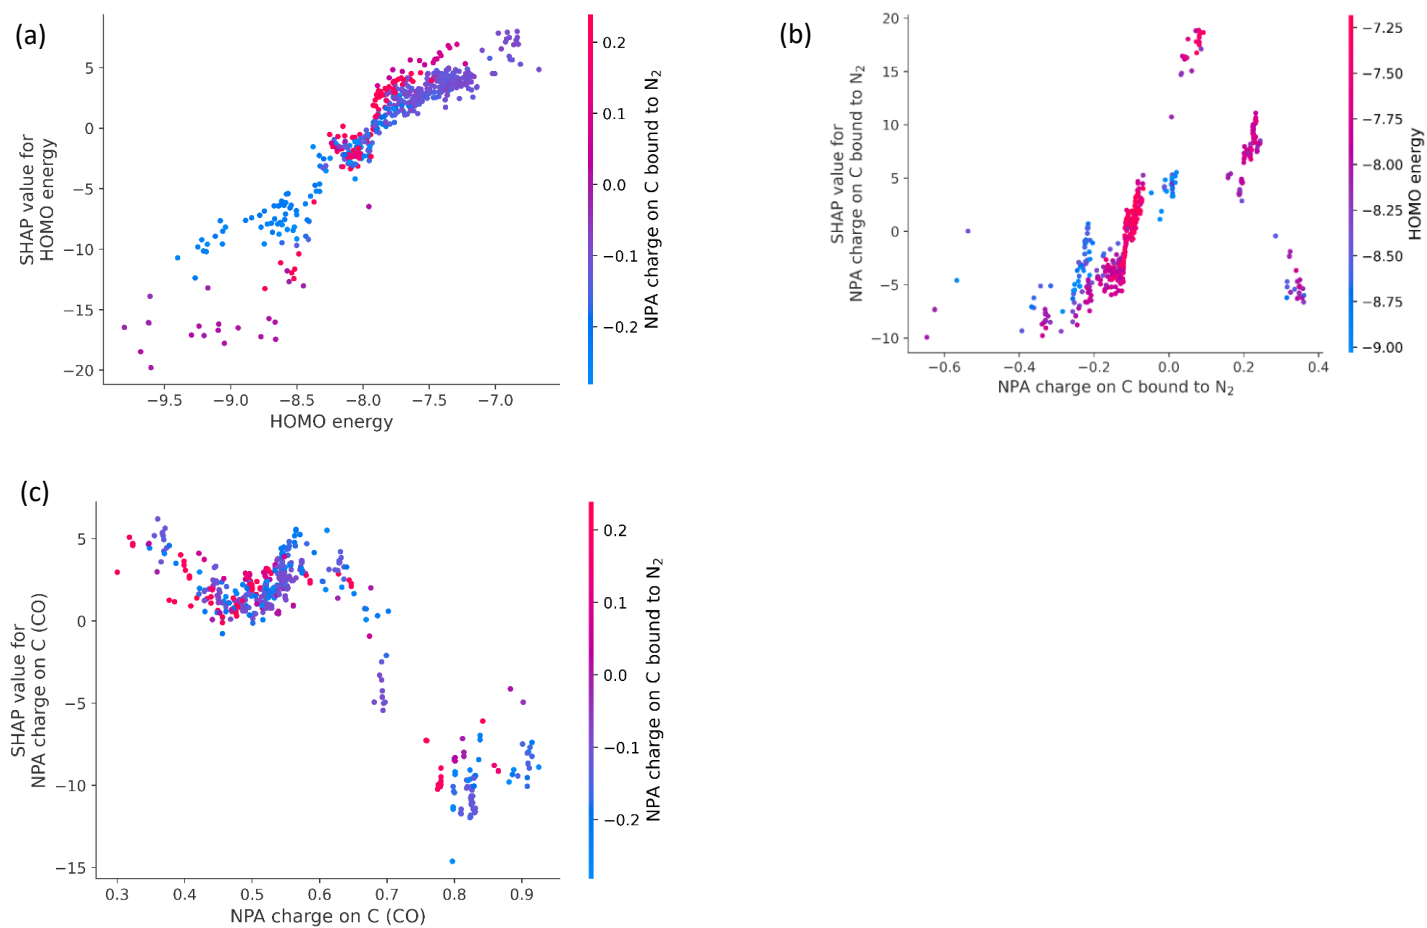

**Figure S8.** SHAP dependence plot of (a) HOMO energy (b) NPA charge on C bound to N<sub>2</sub> (C<sup>2</sup>), and (c) NPA charge on carbonyl carbon (C<sup>1</sup>).

SHAP values for NPA charge on C bound to N<sub>2</sub>

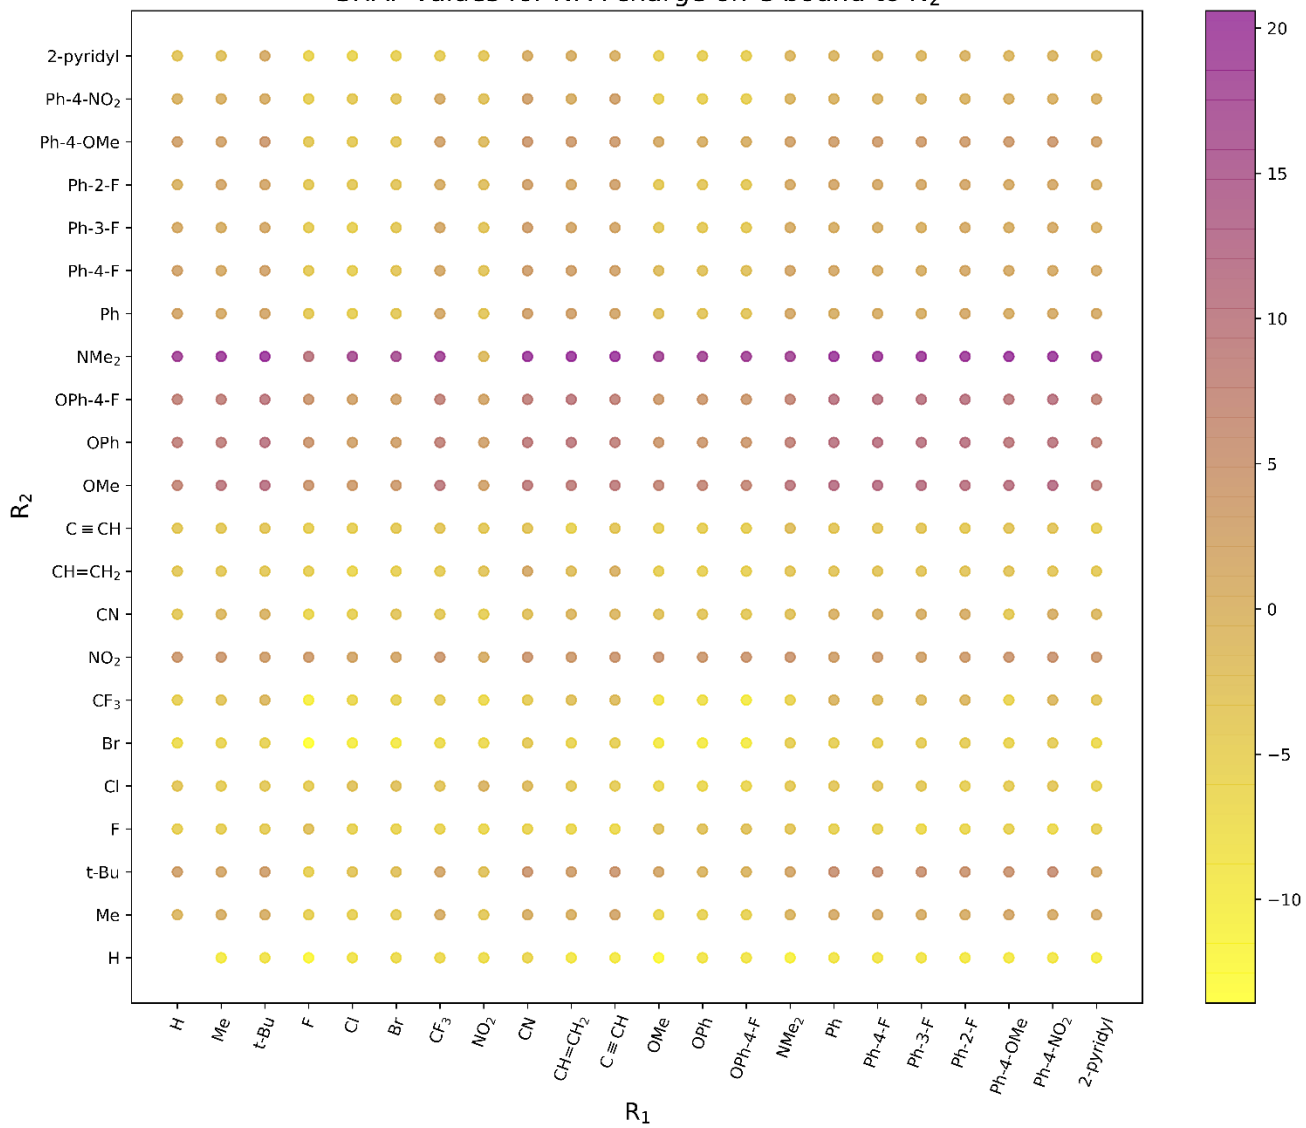

SHAP values for HOMO energy

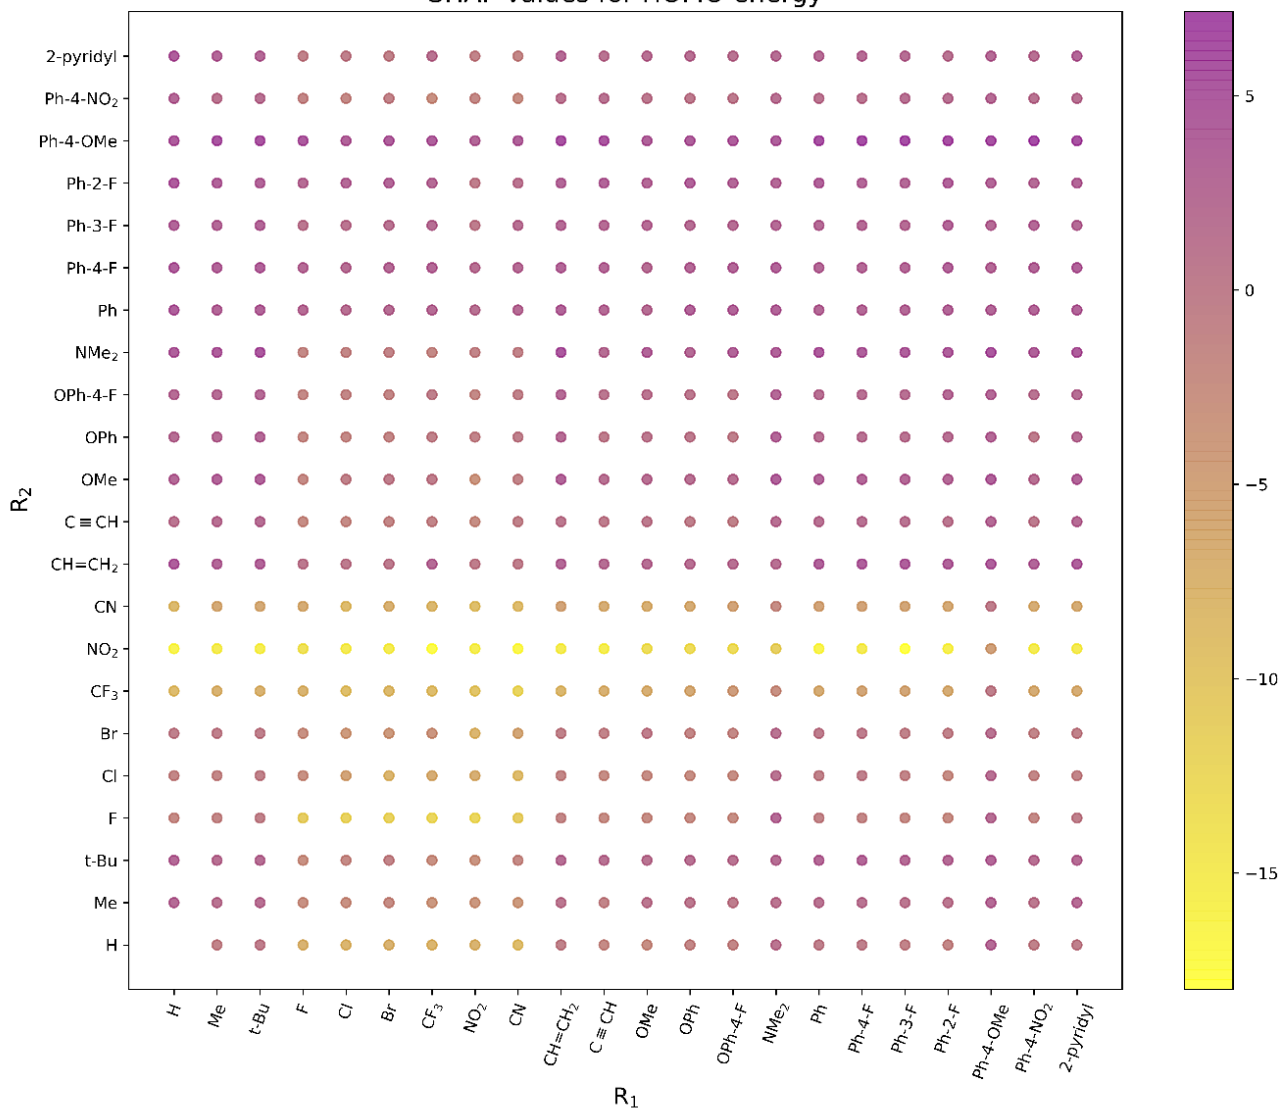

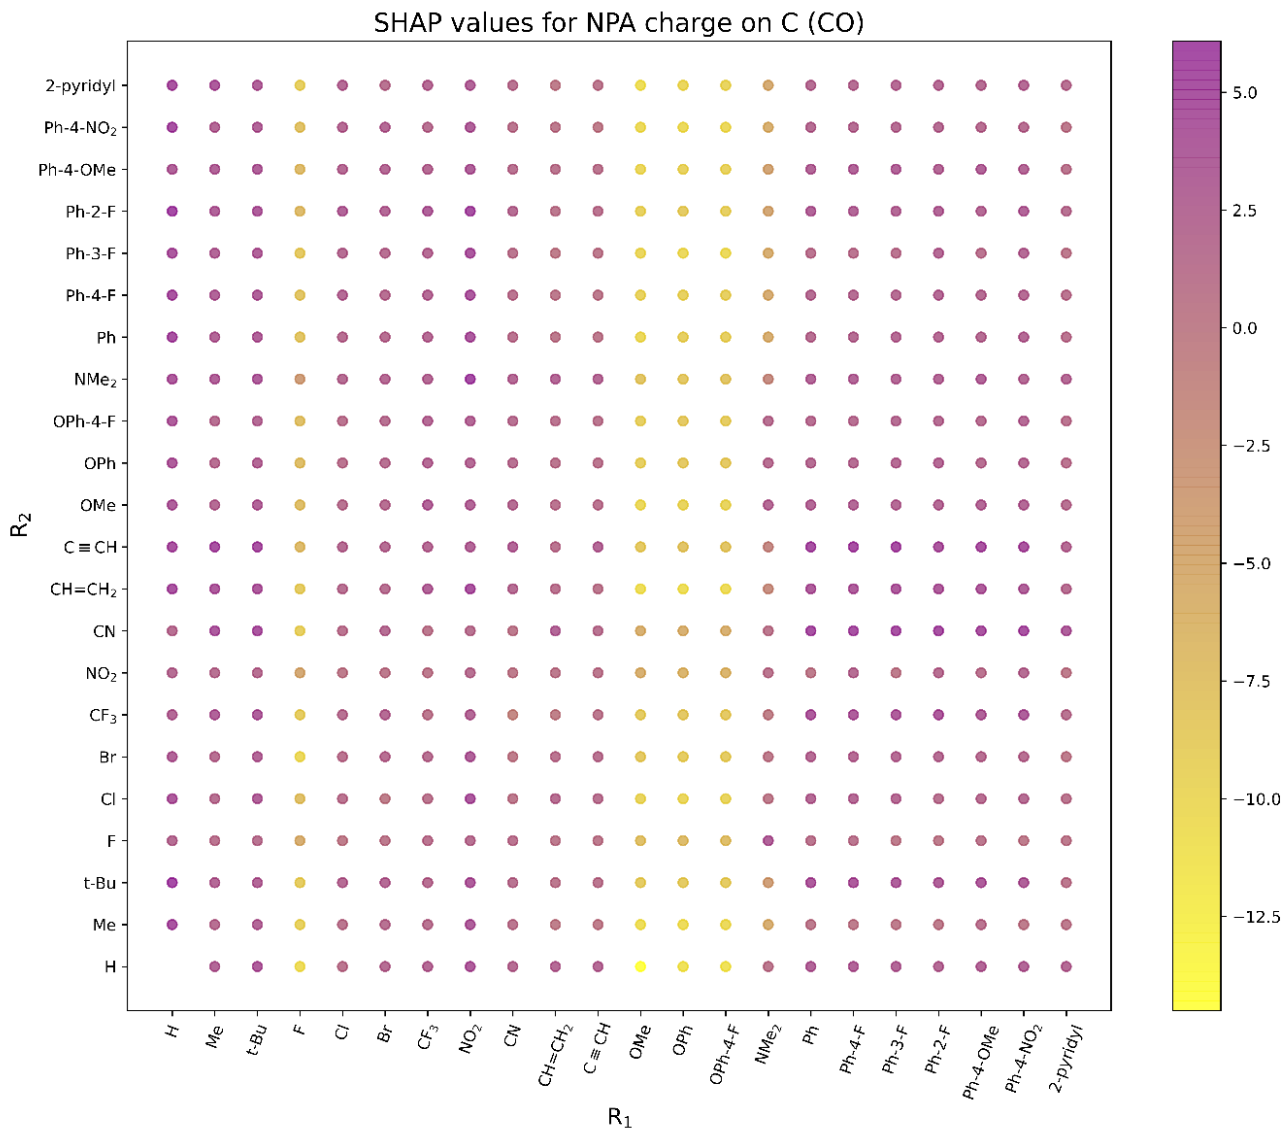

**Figure 9:** SHAP value plots of  $R_1$  and  $R_2$  for the most important features. These plots illustrate the contribution of each feature to the model's predictions.



**Table S3.** The entire dataset of our study: In  $\alpha$ -diazocarbonyl compound naming, the first number represents  $R_1$ , and the second number represents  $R_2$ . The numbers 1 to 22 correspond to the following substituents: 1: H (Hydrogen), 2: Me (Methyl), 3: <sup>t</sup>Bu (tert-Butyl), 4: F (Fluorine), 5: Cl (Chlorine), 6: Br (Bromine), 7: CF<sub>3</sub> (Trifluoromethyl), 8: NO<sub>2</sub> (Nitro), 9: CN (Cyano), 10: CH=CH<sub>2</sub> (Vinyl), 11: C $\equiv$ CH (Ethyne), 12: OMe (Methoxy), 13: OPh (Phenoxy), 14: OPh-4-F (4-Fluorophenoxy), 15: NMe<sub>2</sub> (Dimethylamino), 16: Ph (Phenyl), 17: Ph-4-F (4-Fluorophenyl), 18: Ph-3-F (3-Fluorophenyl), 19: Ph-2-F (2-Fluorophenyl), 20: Ph-4-OMe (4-Methoxyphenyl), 21: Ph-4-NO<sub>2</sub> (4-Nitrophenyl), 22: 2-pyridyl (2-Pyridyl).  $p_z$  ( $C^2$ ), and  $p_x$  (O) represent electron populations on the  $2p_z$  orbital of diazo-attached carbon ( $C^2$ ), and the  $2p_x$  orbital of the carbonyl oxygen respectively. NPA ( $C^2$ ), NPA ( $N^1$ ), NPA ( $N^2$ ), NPA ( $C^1$ ), and NPA (O) demonstrate NPA charges on  $C^2$ ,  $N^1$  (nitrogen attached to carbon),  $N^2$  (terminal nitrogen),  $C^1$ (carbonyl carbon), and O respectively. HOMO represents the HOMO energy level of diazo substrate in eV.  $\Delta G^\ddagger$ ,  $\Delta G_{B-O}^\ddagger$ ,  $\Delta G_{O}^\ddagger$ , and  $\Delta G_{C}^\ddagger$  represent the free energy barrier for N<sub>2</sub> release without borane, relative free energy of B-O adduct, and free energy barrier for N<sub>2</sub> release in path O and path C correspondingly.

| name  | $p_z$ ( $C^2$ ) | $p_x$ (O) | NPA ( $C^2$ ) | NPA ( $N^1$ ) | NPA ( $N^2$ ) | NPA ( $C^1$ ) | NPA (O) | HOMO   | $\Delta G^\ddagger$ | $\Delta G_{B-O}^\ddagger$ | $\Delta G_{O}^\ddagger$ | $\Delta G_{C}^\ddagger$ |
|-------|-----------------|-----------|---------------|---------------|---------------|---------------|---------|--------|---------------------|---------------------------|-------------------------|-------------------------|
| 16_17 | 1.25984         | 1.86131   | -0.089        | 0.086         | 0.08          | 0.547         | -0.599  | -7.221 | 29.64               | -11.41                    | 15.11                   | 22.81                   |
| 8_19  | 1.28716         | 1.8009    | -0.14         | 0.119         | 0.16          | 0.631         | -0.533  | -7.976 | 30.58               | 4.55                      | 16.46                   | 24.22                   |
| 18_19 | 1.18824         | 1.85751   | -0.105        | 0.09          | 0.089         | 0.547         | -0.595  | -7.511 | 30.79               | -10.36                    | 16.39                   | 25.19                   |
| 19_4  | 1.16975         | 1.86966   | 0.348         | 0.005         | 0.079         | 0.477         | -0.569  | -8.086 | 22.05               | -8.69                     | 26.36                   | 18.5                    |
| 19_8  | 1.23926         | 1.85916   | 0.009         | 0.091         | 0.188         | 0.537         | -0.529  | -8.665 | 33.71               | -1.71                     | 36.73                   | 29.31                   |
| 5_10  | 1.30007         | 1.78232   | -0.154        | 0.102         | 0.135         | 0.534         | -0.542  | -7.757 | 35.76               | 0.16                      | 21.26                   | 17.7                    |
| 20_14 | 1.00176         | 1.78926   | 0.226         | 0.037         | 0.069         | 0.5           | -0.595  | -7.702 | 16.74               | -10.87                    | 7.65                    | 23.45                   |
| 4_15  | 1.32803         | 1.79772   | 0.007         | 0.073         | 0.088         | 0.883         | -0.597  | -8.138 | 8.32                | -3.18                     | 0.82                    | 16.39                   |
| 18_22 | 1.24367         | 1.84995   | -0.116        | 0.083         | 0.074         | 0.549         | -0.571  | -7.564 | 32.62               | -8.56                     | 17.16                   | 22.33                   |
| 18_9  | 1.26158         | 1.83808   | -0.217        | 0.112         | 0.154         | 0.565         | -0.565  | -8.616 | 34.38               | -2.77                     | 25.24                   | 27.8                    |
| 19_18 | 1.26662         | 1.85062   | -0.094        | 0.09          | 0.092         | 0.546         | -0.583  | -7.419 | 32.45               | -9.84                     | 15.46                   | 24.55                   |
| 16_18 | 1.27163         | 1.84856   | -0.093        | 0.089         | 0.088         | 0.55          | -0.596  | -7.364 | 32.83               | -9.43                     | 17.63                   | 23.36                   |
| 5_12  | 1.26993         | 1.7629    | 0.194         | 0.052         | 0.119         | 0.485         | -0.54   | -8.16  | 15.38               | -2.63                     | 7.33                    | 13.84                   |
| 5_22  | 1.30518         | 1.75908   | -0.143        | 0.102         | 0.141         | 0.549         | -0.508  | -7.796 | 31.63               | -1.99                     | 20.87                   | 16.56                   |
| 19_20 | 1.25563         | 1.85164   | -0.09         | 0.084         | 0.071         | 0.542         | -0.586  | -6.924 | 28.81               | -11.16                    | 10.23                   | 23.72                   |
| 22_2  | 1.27863         | 1.87981   | -0.104        | 0.1           | 0.051         | 0.505         | -0.621  | -7.554 | 32.56               | -10.32                    | 16.48                   | 18.34                   |
| 4_8   | 1.36236         | 1.78301   | -0.047        | 0.102         | 0.224         | 0.902         | -0.542  | -9.61  | 35.94               | 7.29                      | 47.63                   | 33.35                   |
| 22_10 | 1.28808         | 1.8791    | -0.131        | 0.114         | 0.086         | 0.522         | -0.609  | -7.323 | 35.21               | -6.43                     | 16.3                    | 19.39                   |
| 8_13  | 1.16339         | 1.71765   | 0.189         | 0.075         | 0.164         | 0.586         | -0.523  | -8.171 | 17                  | 5.14                      | 7.6                     | 14.31                   |
| 15_6  | 1.33134         | 1.84095   | -0.217        | 0.034         | 0.045         | 0.669         | -0.658  | -7.652 | 26.91               | -12.41                    | 24.64                   | 24.18                   |
| 22_18 | 1.28932         | 1.85487   | -0.099        | 0.113         | 0.106         | 0.524         | -0.61   | -7.333 | 30.16               | -8.81                     | 13.25                   | 17.83                   |
| 6_22  | 1.30577         | 1.73758   | -0.143        | 0.103         | 0.147         | 0.512         | -0.497  | -7.83  | 31.79               | -1.04                     | 18.48                   | 16.24                   |
| 12_8  | 1.34647         | 1.81547   | -0.01         | 0.1           | 0.19          | 0.812         | -0.595  | -9.173 | 33.76               | 6.5                       | 39.16                   | 25.66                   |
| 5_9   | 1.3695          | 1.78253   | -0.238        | 0.12          | 0.204         | 0.533         | -0.516  | -9.063 | 35.9                | 4.55                      | 43.02                   | 29.04                   |
| 16_10 | 1.24298         | 1.8759    | -0.124        | 0.091         | 0.076         | 0.546         | -0.599  | -7.388 | 34.73               | -10.63                    | 18.17                   | 24.73                   |
| 11_6  | 1.34773         | 1.84615   | -0.211        | 0.059         | 0.115         | 0.461         | -0.555  | -8.074 | 29.28               | -8.43                     | 27.91                   | 21                      |
| 16_19 | 1.21991         | 1.86263   | -0.105        | 0.089         | 0.083         | 0.548         | -0.599  | -7.466 | 30.83               | -10.7                     | 16.14                   | 28.45                   |
| 18_11 | 1.23066         | 1.84533   | -0.165        | 0.101         | 0.11          | 0.555         | -0.577  | -7.803 | 29.18               | -7.46                     | 17.63                   | 24.34                   |
| 18_4  | 1.25613         | 1.85282   | 0.358         | 0.003         | 0.072         | 0.476         | -0.581  | -8.073 | 15.51               | -11.81                    | 24.44                   | 20.68                   |
| 20_16 | 1.25733         | 1.85283   | -0.093        | 0.084         | 0.065         | 0.545         | -0.601  | -7.2   | 31.48               | -11.12                    | 16.5                    | 24.13                   |

|       |         |         |        |       |       |       |        |        |       |        |       |       |
|-------|---------|---------|--------|-------|-------|-------|--------|--------|-------|--------|-------|-------|
| 11_8  | 1.33045 | 1.85922 | 0.02   | 0.097 | 0.206 | 0.48  | -0.515 | -9.297 | 33.6  | -3.03  | 37.7  | 30.84 |
| 6_13  | 1.11887 | 1.68393 | 0.189  | 0.056 | 0.14  | 0.441 | -0.523 | -8.107 | 16.81 | -0.24  | 7.85  | 12.9  |
| 10_15 | 1.24102 | 1.87659 | 0.092  | 0.046 | 0.04  | 0.49  | -0.613 | -7.346 | 7.94  | -17    | -0.69 | 29.07 |
| 20_5  | 1.28453 | 1.84251 | -0.133 | 0.047 | 0.086 | 0.519 | -0.587 | -7.736 | 28.8  | -9.57  | 22.94 | 23.82 |
| 18_16 | 1.24499 | 1.85435 | -0.095 | 0.086 | 0.078 | 0.545 | -0.592 | -7.31  | 31.15 | -9.83  | 15.16 | 22.87 |
| 1_20  | 1.26947 | 1.84736 | -0.105 | 0.089 | 0.078 | 0.365 | -0.602 | -6.896 | 27.75 | -16.71 | 15.16 | 28.13 |
| 17_17 | 1.27046 | 1.85685 | -0.093 | 0.083 | 0.074 | 0.546 | -0.596 | -7.255 | 31.21 | -10.21 | 15.68 | 23.65 |
| 22_12 | 1.26537 | 1.86572 | 0.225  | 0.06  | 0.069 | 0.472 | -0.607 | -7.624 | 16.34 | -11.78 | 4.6   | 20.62 |
| 19_16 | 1.21716 | 1.86504 | -0.091 | 0.089 | 0.088 | 0.545 | -0.586 | -7.307 | 31.44 | -10.58 | 13.77 | 23.14 |
| 17_20 | 1.27064 | 1.84832 | -0.09  | 0.081 | 0.063 | 0.543 | -0.598 | -6.91  | 29.23 | -11.81 | 11.09 | 28.24 |
| 5_16  | 1.29818 | 1.77264 | -0.122 | 0.102 | 0.137 | 0.539 | -0.542 | -7.564 | 29.82 | -2.77  | 16.61 | 16.44 |
| 6_17  | 1.29836 | 1.75353 | -0.121 | 0.102 | 0.142 | 0.495 | -0.534 | -7.554 | 28.61 | -1.42  | 13.08 | 16.4  |
| 17_4  | 1.21841 | 1.86043 | 0.349  | 0.003 | 0.074 | 0.479 | -0.582 | -8.05  | 19.71 | -7.72  | 23.32 | 19.8  |
| 14_17 | 1.30097 | 1.82946 | -0.119 | 0.094 | 0.091 | 0.826 | -0.623 | -7.276 | 28.18 | -4.68  | 20.04 | 13.91 |
| 8_9   | 1.37494 | 1.80252 | -0.242 | 0.135 | 0.225 | 0.651 | -0.497 | -9.249 | 38.3  | 12.84  | 45.75 | 35.34 |
| 3_11  | 1.3083  | 1.87787 | -0.165 | 0.098 | 0.087 | 0.581 | -0.582 | -7.706 | 29.96 | -5.26  | 14.13 | 21.3  |
| 8_20  | 1.29492 | 1.79255 | -0.118 | 0.117 | 0.155 | 0.627 | -0.539 | -7.226 | 24.23 | 0.13   | 7.6   | 14.76 |
| 12_2  | 1.29096 | 1.79232 | -0.126 | 0.083 | 0.029 | 0.809 | -0.652 | -7.618 | 32.91 | -4.25  | 27.62 | 12.33 |
| 1_5   | 1.34307 | 1.58698 | -0.161 | 0.055 | 0.101 | 0.346 | -0.58  | -8.046 | 27.56 | -12.73 | 22.52 | 24.14 |
| 19_12 | 1.13723 | 1.86443 | 0.231  | 0.037 | 0.064 | 0.494 | -0.586 | -7.764 | 16.01 | -12.92 | 4.68  | 22.58 |
| 13_4  | 1.28562 | 1.79809 | 0.322  | 0.009 | 0.077 | 0.759 | -0.606 | -8.153 | 17.9  | -3.87  | 23.11 | 11.77 |
| 2_15  | 1.30437 | 1.73717 | 0.051  | 0.079 | 0.053 | 0.534 | -0.631 | -7.644 | 9.88  | -18.27 | 0.94  | 31.32 |
| 6_18  | 1.30061 | 1.74512 | -0.124 | 0.104 | 0.148 | 0.495 | -0.532 | -7.716 | 31.97 | 0.43   | 16.01 | 17.33 |
| 6_9   | 1.36905 | 1.76551 | -0.237 | 0.121 | 0.208 | 0.486 | -0.508 | -9.079 | 36.4  | 5.01   | 34.34 | 29.92 |
| 1_22  | 1.27863 | 1.86481 | -0.129 | 0.091 | 0.09  | 0.369 | -0.57  | -7.509 | 30.97 | -16.27 | 19.48 | 27.75 |
| 2_6   | 1.34601 | 1.85898 | -0.218 | 0.051 | 0.084 | 0.531 | -0.593 | -7.892 | 27.77 | -10.93 | 25.53 | 21.86 |
| 17_7  | 1.29924 | 1.85445 | -0.225 | 0.089 | 0.116 | 0.546 | -0.584 | -8.585 | 37.49 | -5.94  | 30.9  | 29.6  |
| 16_22 | 1.27519 | 1.85569 | -0.115 | 0.082 | 0.068 | 0.55  | -0.574 | -7.504 | 32.39 | -9.59  | 16.99 | 22.77 |
| 13_6  | 1.37546 | 1.82235 | -0.249 | 0.06  | 0.099 | 0.801 | -0.607 | -7.991 | 26.88 | -2.58  | 29.88 | 12.49 |
| 5_1   | 1.32021 | 1.66853 | -0.361 | 0.096 | 0.112 | 0.514 | -0.541 | -8.573 | 38.69 | -2.27  | 34.54 | 19.65 |
| 15_1  | 1.26086 | 1.75853 | -0.338 | 0.062 | 0.005 | 0.669 | -0.677 | -7.768 | 33.8  | -18.37 | 37.33 | 27.54 |
| 8_16  | 1.29975 | 1.80046 | -0.123 | 0.12  | 0.161 | 0.63  | -0.535 | -7.722 | 29.26 | 1.75   | 13.63 | 17.93 |
| 19_10 | 1.19529 | 1.87463 | -0.124 | 0.092 | 0.082 | 0.544 | -0.586 | -7.437 | 34.75 | -10.46 | 18.87 | 25.13 |
| 21_7  | 1.28524 | 1.8506  | -0.224 | 0.09  | 0.128 | 0.544 | -0.573 | -8.842 | 38.27 | -3.93  | 32.06 | 31.01 |
| 15_7  | 1.32037 | 1.84347 | -0.232 | 0.078 | 0.079 | 0.686 | -0.666 | -8.325 | 34.67 | -10.38 | 36.35 | 28.62 |
| 10_2  | 1.25692 | 1.83616 | -0.089 | 0.076 | 0.035 | 0.501 | -0.622 | -7.642 | 33.77 | -11.25 | 19.89 | 21.65 |
| 2_19  | 1.28581 | 1.87072 | -0.104 | 0.092 | 0.088 | 0.558 | -0.615 | -7.305 | 27.35 | -17.18 | 15.68 | 27.63 |
| 3_17  | 1.26976 | 1.86764 | -0.088 | 0.084 | 0.063 | 0.574 | -0.601 | -7.201 | 30.96 | -7.68  | 9.09  | 22.13 |
| 14_20 | 1.29626 | 1.83272 | -0.116 | 0.092 | 0.081 | 0.825 | -0.624 | -6.888 | 30.3  | -2.79  | 17.66 | 15.55 |
| 18_6  | 1.27019 | 1.84285 | -0.215 | 0.052 | 0.097 | 0.521 | -0.576 | -7.96  | 30.47 | -7.12  | 23.79 | 22.86 |
| 21_11 | 1.25945 | 1.85282 | -0.163 | 0.101 | 0.117 | 0.552 | -0.572 | -7.886 | 29.54 | -6.37  | 17.73 | 24.08 |
| 22_1  | 1.30881 | 1.88611 | -0.339 | 0.099 | 0.061 | 0.499 | -0.611 | -7.948 | 38.11 | -6.87  | 27.11 | 19.53 |
| 1_15  | 1.30705 | 1.60712 | 0.036  | 0.079 | 0.073 | 0.347 | -0.622 | -7.776 | 8.58  | -20.26 | 1.27  | 32.87 |
| 15_20 | 1.27114 | 1.79598 | -0.09  | 0.063 | 0.015 | 0.692 | -0.671 | -6.671 | 31.09 | -15.32 | 21.43 | 26.58 |

|       |         |         |        |       |       |       |        |        |       |        |       |       |
|-------|---------|---------|--------|-------|-------|-------|--------|--------|-------|--------|-------|-------|
| 10_6  | 1.34102 | 1.87433 | -0.208 | 0.05  | 0.089 | 0.491 | -0.593 | -7.903 | 29.56 | -4.27  | 20.21 | 16.21 |
| 19_2  | 1.17572 | 1.87548 | -0.09  | 0.075 | 0.038 | 0.529 | -0.593 | -7.706 | 33.64 | -12.77 | 18.61 | 22.31 |
| 11_7  | 1.33446 | 1.8494  | -0.213 | 0.096 | 0.138 | 0.486 | -0.555 | -8.888 | 37.73 | -6.95  | 39.55 | 32.99 |
| 7_21  | 1.28903 | 1.85868 | -0.108 | 0.094 | 0.151 | 0.451 | -0.552 | -7.959 | 33.5  | 2.61   | 15.36 | 21.47 |
| 9_12  | 1.24352 | 1.83198 | 0.244  | 0.047 | 0.131 | 0.401 | -0.547 | -8.253 | 14.68 | -7.32  | 5.48  | 19.69 |
| 2_3   | 1.25833 | 1.87996 | -0.088 | 0.076 | 0.026 | 0.547 | -0.626 | -7.615 | 30.53 | -17.69 | 23.62 | 32.46 |
| 10_1  | 1.28784 | 1.74783 | -0.323 | 0.076 | 0.047 | 0.492 | -0.615 | -8.042 | 36.3  | -10.72 | 25.35 | 20.6  |
| 16_1  | 1.25601 | 1.88407 | -0.33  | 0.077 | 0.049 | 0.522 | -0.602 | -8.044 | 37.08 | -12.26 | 27.3  | 23.12 |
| 8_8   | 1.36179 | 1.78952 | -0.024 | 0.11  | 0.253 | 0.627 | -0.469 | -9.804 | 38.57 | 14.21  | 54.03 | 40.72 |
| 13_18 | 1.30374 | 1.83252 | -0.122 | 0.098 | 0.098 | 0.828 | -0.622 | -7.408 | 31.97 | -3.19  | 24.25 | 14.37 |
| 13_21 | 1.30675 | 1.83252 | -0.125 | 0.101 | 0.118 | 0.831 | -0.618 | -7.666 | 34.1  | -1.12  | 26.21 | 13    |
| 20_15 | 1.17474 | 1.85764 | 0.081  | 0.05  | 0.037 | 0.521 | -0.607 | -7.357 | 8.51  | -18.77 | -0.25 | 31.13 |
| 14_14 | 1.02509 | 1.79485 | 0.194  | 0.047 | 0.084 | 0.78  | -0.611 | -7.891 | 17.74 | -3.47  | 16.6  | 13.32 |
| 7_18  | 1.28447 | 1.84893 | -0.103 | 0.092 | 0.135 | 0.447 | -0.558 | -7.684 | 29.82 | -0.33  | 10.16 | 17.96 |
| 7_1   | 1.30261 | 1.73621 | -0.343 | 0.083 | 0.099 | 0.422 | -0.562 | -8.519 | 39.54 | 1.38   | 26.48 | 18.75 |
| 15_9  | 1.32397 | 1.84711 | -0.222 | 0.098 | 0.118 | 0.702 | -0.654 | -8.331 | 31.53 | -9.86  | 30.52 | 29.47 |
| 20_12 | 1.19019 | 1.84104 | 0.233  | 0.034 | 0.05  | 0.496 | -0.606 | -7.566 | 14.61 | -14.27 | 6.25  | 25.52 |
| 6_11  | 1.33594 | 1.76002 | -0.19  | 0.114 | 0.164 | 0.493 | -0.518 | -8.162 | 29.95 | 1.8    | 20.59 | 18.93 |
| 2_10  | 1.2748  | 1.86239 | -0.13  | 0.091 | 0.069 | 0.556 | -0.613 | -7.374 | 33.41 | -13.47 | 19.09 | 24.09 |
| 9_1   | 1.29231 | 1.65804 | -0.316 | 0.089 | 0.117 | 0.43  | -0.546 | -8.635 | 41.37 | -5.5   | 36.59 | 25.34 |
| 6_5   | 1.36828 | 1.76418 | -0.176 | 0.065 | 0.16  | 0.456 | -0.518 | -8.433 | 29.07 | 1.68   | 25.37 | 14.71 |
| 4_19  | 1.32168 | 1.80688 | -0.158 | 0.104 | 0.128 | 0.912 | -0.595 | -7.573 | 28.6  | -3     | 22.97 | 19.19 |
| 5_19  | 1.31069 | 1.77676 | -0.128 | 0.103 | 0.151 | 0.538 | -0.544 | -7.633 | 28.08 | -4.25  | 16.64 | 22.07 |
| 15_18 | 1.2783  | 1.79396 | -0.096 | 0.071 | 0.037 | 0.694 | -0.67  | -7.139 | 34.21 | -13    | 25.46 | 25.24 |
| 20_3  | 1.20752 | 1.85687 | -0.082 | 0.074 | 0.027 | 0.537 | -0.616 | -7.514 | 32.34 | -14.51 | 17.38 | 32.64 |
| 4_10  | 1.31009 | 1.77427 | -0.183 | 0.103 | 0.114 | 0.908 | -0.595 | -7.696 | 34.5  | -0.68  | 27.06 | 15.95 |
| 21_6  | 1.2953  | 1.85013 | -0.216 | 0.052 | 0.104 | 0.518 | -0.571 | -8.051 | 31.12 | -5.81  | 23.69 | 22.15 |
| 13_7  | 1.36065 | 1.82198 | -0.253 | 0.099 | 0.129 | 0.823 | -0.61  | -8.502 | 36.22 | 1.83   | 42.7  | 22.9  |
| 14_21 | 1.30716 | 1.83125 | -0.126 | 0.101 | 0.12  | 0.831 | -0.617 | -7.685 | 35.47 | 0.49   | 27.91 | 14.84 |
| 20_9  | 1.29114 | 1.83632 | -0.216 | 0.108 | 0.145 | 0.563 | -0.577 | -7.918 | 33.41 | -4.99  | 24.08 | 27.74 |
| 7_9   | 1.35743 | 1.8628  | -0.228 | 0.111 | 0.196 | 0.466 | -0.523 | -9.061 | 35.84 | 8      | 41.05 | 31.09 |
| 9_15  | 1.28639 | 1.85994 | 0.086  | 0.068 | 0.118 | 0.429 | -0.551 | -8.239 | 6.28  | -10.99 | -0.94 | 26.53 |
| 19_21 | 1.24655 | 1.85722 | -0.097 | 0.094 | 0.113 | 0.551 | -0.578 | -7.662 | 34.67 | -8.1   | 17.81 | 25.73 |
| 12_3  | 1.28528 | 1.84377 | -0.113 | 0.082 | 0.027 | 0.818 | -0.653 | -7.609 | 31.41 | -4.57  | 23.73 | 18.06 |
| 19_17 | 1.21773 | 1.86238 | -0.089 | 0.088 | 0.088 | 0.545 | -0.587 | -7.283 | 30.29 | -9.46  | 11.29 | 21.55 |
| 6_20  | 1.28265 | 1.74344 | -0.125 | 0.097 | 0.128 | 0.494 | -0.533 | -7.212 | 27.74 | -0.87  | 10.56 | 16.82 |
| 15_17 | 1.27448 | 1.81515 | -0.093 | 0.067 | 0.026 | 0.693 | -0.67  | -7.005 | 32.67 | -14.38 | 24.23 | 26.36 |
| 9_19  | 1.25945 | 1.84675 | -0.088 | 0.098 | 0.146 | 0.452 | -0.545 | -7.826 | 29.57 | -5.25  | 15.02 | 27.25 |
| 1_6   | 1.35103 | 1.74616 | -0.241 | 0.058 | 0.099 | 0.348 | -0.579 | -7.985 | 29.08 | -11.92 | 24.98 | 23.57 |
| 15_10 | 1.25718 | 1.85648 | -0.128 | 0.075 | 0.034 | 0.692 | -0.675 | -7.17  | 34.7  | -15.26 | 30.63 | 26.88 |
| 21_3  | 1.20738 | 1.86244 | -0.083 | 0.077 | 0.049 | 0.534 | -0.602 | -7.795 | 31.79 | -12.08 | 17.11 | 31.66 |
| 17_10 | 1.24375 | 1.8706  | -0.123 | 0.09  | 0.077 | 0.545 | -0.6   | -7.408 | 34.46 | -11.13 | 18.83 | 25.72 |
| 21_21 | 1.26735 | 1.85508 | -0.097 | 0.092 | 0.116 | 0.55  | -0.582 | -7.731 | 34.52 | -6.55  | 19.3  | 25.09 |
| 6_12  | 1.27734 | 1.74757 | 0.194  | 0.054 | 0.125 | 0.442 | -0.531 | -8.19  | 15.42 | -1.62  | 5.48  | 13.29 |

|       |         |         |        |       |       |       |        |        |       |        |       |       |
|-------|---------|---------|--------|-------|-------|-------|--------|--------|-------|--------|-------|-------|
| 5_14  | 1.06556 | 1.65474 | 0.189  | 0.055 | 0.136 | 0.485 | -0.532 | -8.03  | 16.69 | -0.69  | 9.81  | 13.41 |
| 15_21 | 1.28102 | 1.80241 | -0.1   | 0.076 | 0.06  | 0.695 | -0.667 | -7.38  | 36.55 | -12.63 | 28.2  | 26.26 |
| 11_19 | 1.28271 | 1.86056 | -0.085 | 0.096 | 0.119 | 0.487 | -0.575 | -7.443 | 28.2  | -13.57 | 18.17 | 29.08 |
| 16_8  | 1.28649 | 1.85974 | 0.01   | 0.09  | 0.182 | 0.539 | -0.543 | -8.772 | 33.37 | -2.5   | 34.64 | 22.45 |
| 18_13 | 1.03654 | 1.78222 | 0.225  | 0.04  | 0.082 | 0.5   | -0.584 | -7.923 | 16.56 | -9.98  | 6.81  | 22.96 |
| 11_14 | 1.03191 | 1.69035 | 0.235  | 0.047 | 0.101 | 0.439 | -0.563 | -7.905 | 16.95 | -10.37 | 10.44 | 21.82 |
| 9_16  | 1.26748 | 1.84677 | -0.076 | 0.094 | 0.145 | 0.45  | -0.547 | -7.653 | 29.48 | -5.65  | 14.04 | 22.24 |
| 18_5  | 1.25561 | 1.84395 | -0.136 | 0.049 | 0.1   | 0.52  | -0.576 | -8.021 | 29.22 | -7.22  | 22.22 | 22.35 |
| 22_21 | 1.29273 | 1.862   | -0.101 | 0.118 | 0.121 | 0.529 | -0.604 | -7.576 | 32.15 | -7.15  | 15.35 | 18.28 |
| 3_6   | 1.34284 | 1.86928 | -0.208 | 0.047 | 0.073 | 0.548 | -0.58  | -7.854 | 30.44 | -2.65  | 18.68 | 17.64 |
| 16_9  | 1.31045 | 1.85797 | -0.217 | 0.112 | 0.149 | 0.565 | -0.57  | -8.579 | 33.71 | -3.86  | 24.84 | 27.67 |
| 12_18 | 1.30073 | 1.82764 | -0.121 | 0.096 | 0.087 | 0.827 | -0.642 | -7.331 | 31.85 | -2.06  | 22.79 | 11.88 |
| 22_22 | 1.29091 | 1.86759 | -0.117 | 0.109 | 0.098 | 0.521 | -0.575 | -7.404 | 28.24 | -9.98  | 13.87 | 18.64 |
| 12_21 | 1.30314 | 1.8338  | -0.123 | 0.1   | 0.107 | 0.83  | -0.639 | -7.587 | 34.06 | -0.67  | 27.36 | 12.32 |
| 7_19  | 1.26769 | 1.86338 | -0.116 | 0.092 | 0.129 | 0.446 | -0.558 | -7.76  | 29.85 | 0.67   | 10.51 | 22.12 |
| 17_22 | 1.2731  | 1.85408 | -0.114 | 0.081 | 0.068 | 0.55  | -0.575 | -7.524 | 32.57 | -9.49  | 17.34 | 22.75 |
| 11_2  | 1.26108 | 1.87312 | -0.083 | 0.085 | 0.063 | 0.468 | -0.585 | -7.828 | 33.12 | -13.89 | 24.61 | 24.48 |
| 10_8  | 1.32362 | 1.86013 | 0.017  | 0.091 | 0.184 | 0.507 | -0.557 | -9.095 | 32.6  | -1.62  | 35.06 | 25.21 |
| 20_17 | 1.26116 | 1.85046 | -0.092 | 0.082 | 0.065 | 0.545 | -0.602 | -7.182 | 30.88 | -11.4  | 15.79 | 23.85 |
| 21_12 | 1.18832 | 1.8512  | 0.232  | 0.037 | 0.073 | 0.492 | -0.591 | -7.867 | 14.59 | -11.01 | 4.35  | 23.78 |
| 8_14  | 1.09675 | 1.68838 | 0.188  | 0.075 | 0.166 | 0.586 | -0.523 | -8.089 | 16.48 | 4.86   | 7.96  | 14.33 |
| 19_6  | 1.25883 | 1.85939 | -0.216 | 0.053 | 0.097 | 0.52  | -0.567 | -7.957 | 30.76 | -7.75  | 27.66 | 19.91 |
| 16_15 | 1.17903 | 1.87588 | 0.081  | 0.051 | 0.044 | 0.521 | -0.602 | -7.423 | 8     | -17.37 | -0.33 | 30.4  |
| 18_2  | 1.1907  | 1.85121 | -0.09  | 0.074 | 0.038 | 0.529 | -0.603 | -7.706 | 33.57 | -12.93 | 21.38 | 25.72 |
| 21_20 | 1.26615 | 1.85066 | -0.089 | 0.083 | 0.078 | 0.54  | -0.59  | -6.978 | 28.95 | -10.38 | 9.41  | 26.46 |
| 11_10 | 1.27342 | 1.87447 | -0.111 | 0.097 | 0.101 | 0.483 | -0.573 | -7.531 | 33.83 | -11.58 | 21.64 | 25.49 |
| 8_7   | 1.36293 | 1.80323 | -0.255 | 0.118 | 0.194 | 0.633 | -0.511 | -9.401 | 43.79 | 10.38  | 48.59 | 35.67 |
| 6_7   | 1.35807 | 1.76047 | -0.252 | 0.104 | 0.176 | 0.477 | -0.518 | -9.219 | 40.37 | 3.76   | 40.08 | 31.36 |
| 4_18  | 1.31204 | 1.78214 | -0.153 | 0.102 | 0.126 | 0.911 | -0.593 | -7.627 | 32.57 | 0.27   | 24.66 | 15.12 |
| 10_22 | 1.27005 | 1.87131 | -0.103 | 0.085 | 0.081 | 0.516 | -0.58  | -7.459 | 29.46 | -11.08 | 17.67 | 21.36 |
| 12_22 | 1.30033 | 1.83493 | -0.137 | 0.095 | 0.084 | 0.824 | -0.616 | -7.427 | 30.47 | -3.76  | 25.81 | 13.51 |
| 11_9  | 1.34707 | 1.84622 | -0.204 | 0.118 | 0.17  | 0.505 | -0.541 | -8.781 | 34.42 | -4.56  | 31.19 | 29.27 |
| 22_15 | 1.26851 | 1.87868 | 0.073  | 0.075 | 0.05  | 0.496 | -0.608 | -7.411 | 9.06  | -14.68 | -1.07 | 26.5  |
| 4_1   | 1.33285 | 1.61667 | -0.393 | 0.091 | 0.092 | 0.881 | -0.599 | -8.501 | 41.14 | -1.34  | 49.03 | 16.34 |
| 7_5   | 1.35111 | 1.86672 | -0.157 | 0.053 | 0.147 | 0.421 | -0.54  | -8.413 | 29.03 | 3.07   | 23.47 | 16.09 |
| 1_2   | 1.26696 | 1.59646 | -0.117 | 0.083 | 0.042 | 0.355 | -0.61  | -7.705 | 32.33 | -18.29 | 19.69 | 27.74 |
| 4_14  | 1.10168 | 1.66551 | 0.158  | 0.054 | 0.114 | 0.865 | -0.584 | -8.024 | 18.04 | 0.75   | 16.77 | 11.41 |
| 9_4   | 1.26423 | 1.83071 | 0.361  | 0.018 | 0.149 | 0.385 | -0.529 | -8.623 | 21.64 | -2.21  | 29.46 | 15.51 |
| 22_14 | 1.09289 | 1.76673 | 0.217  | 0.063 | 0.088 | 0.477 | -0.595 | -7.76  | 18.26 | -9.51  | 7.47  | 19.19 |
| 7_8   | 1.34142 | 1.85976 | -0.006 | 0.088 | 0.229 | 0.441 | -0.499 | -9.603 | 34.78 | 9.27   | 49.73 | 33.73 |
| 7_14  | 1.01178 | 1.70383 | 0.209  | 0.045 | 0.131 | 0.399 | -0.548 | -8.025 | 16.48 | 0.8    | 1.92  | 14.3  |
| 1_7   | 1.33799 | 1.60546 | -0.245 | 0.096 | 0.122 | 0.37  | -0.581 | -8.771 | 38.11 | -9.45  | 35.35 | 31.47 |
| 16_2  | 1.26261 | 1.88114 | -0.088 | 0.077 | 0.03  | 0.526 | -0.617 | -7.628 | 28    | -18.78 | 20.94 | 25.81 |
| 20_20 | 1.26418 | 1.84442 | -0.088 | 0.08  | 0.056 | 0.543 | -0.603 | -6.836 | 29.33 | -12.39 | 11.08 | 27.82 |

|       |         |         |        |       |       |       |        |        |       |        |       |       |
|-------|---------|---------|--------|-------|-------|-------|--------|--------|-------|--------|-------|-------|
| 18_14 | 0.99917 | 1.76106 | 0.224  | 0.04  | 0.083 | 0.5   | -0.584 | -7.868 | 16.41 | -9.52  | 6.95  | 23.59 |
| 11_11 | 1.31025 | 1.85143 | -0.151 | 0.107 | 0.128 | 0.493 | -0.556 | -7.911 | 28.86 | -9.04  | 20.59 | 23.66 |
| 22_5  | 1.35368 | 1.86878 | -0.135 | 0.07  | 0.105 | 0.495 | -0.589 | -7.879 | 29.31 | -3.28  | 21    | 14.48 |
| 5_20  | 1.28262 | 1.75922 | -0.124 | 0.096 | 0.123 | 0.536 | -0.543 | -7.183 | 27.53 | -3.65  | 13.88 | 18.34 |
| 2_9   | 1.34543 | 1.87207 | -0.223 | 0.11  | 0.147 | 0.574 | -0.583 | -8.592 | 31.9  | -6.47  | 35.98 | 26.74 |
| 10_17 | 1.26558 | 1.8698  | -0.081 | 0.085 | 0.08  | 0.516 | -0.614 | -7.23  | 30.88 | -9.29  | 13.2  | 21.54 |
| 1_8   | 1.33053 | 1.59653 | -0.01  | 0.097 | 0.193 | 0.359 | -0.542 | -9.202 | 33.04 | -6.08  | 38.59 | 32.27 |
| 14_22 | 1.27935 | 1.82045 | -0.141 | 0.095 | 0.09  | 0.825 | -0.6   | -7.576 | 31.48 | -1.98  | 25.9  | 14.58 |
| 16_20 | 1.27102 | 1.84831 | -0.091 | 0.082 | 0.063 | 0.544 | -0.598 | -6.894 | 29.35 | -11.14 | 10.13 | 24.16 |
| 10_11 | 1.30509 | 1.87538 | -0.158 | 0.1   | 0.103 | 0.524 | -0.595 | -7.755 | 29.06 | -7.13  | 16.21 | 20.45 |
| 2_12  | 1.23156 | 1.83285 | 0.225  | 0.033 | 0.042 | 0.507 | -0.604 | -7.647 | 15.73 | -15.5  | 6.72  | 24.72 |
| 13_11 | 1.33669 | 1.81421 | -0.191 | 0.109 | 0.117 | 0.831 | -0.61  | -7.84  | 27.97 | -1.53  | 23.75 | 13.37 |
| 14_15 | 1.26888 | 1.8139  | 0.043  | 0.067 | 0.058 | 0.801 | -0.621 | -7.704 | 8.16  | -6.99  | 2.05  | 18.96 |
| 6_10  | 1.3     | 1.76538 | -0.154 | 0.103 | 0.14  | 0.491 | -0.533 | -7.78  | 34.17 | -2.14  | 20.74 | 19.3  |
| 10_13 | 1.10279 | 1.75187 | 0.232  | 0.039 | 0.072 | 0.47  | -0.6   | -7.824 | 16.92 | -9.25  | 5.71  | 19.8  |
| 3_22  | 1.27199 | 1.86882 | -0.108 | 0.084 | 0.064 | 0.571 | -0.567 | -7.423 | 29.61 | -9.41  | 11.4  | 20.28 |
| 18_8  | 1.2317  | 1.8474  | 0.009  | 0.09  | 0.187 | 0.539 | -0.538 | -8.661 | 33.46 | -1.44  | 34.89 | 19.12 |
| 8_21  | 1.30836 | 1.79682 | -0.128 | 0.122 | 0.181 | 0.636 | -0.527 | -8.131 | 32.04 | 4.02   | 19.64 | 21.79 |
| 22_13 | 1.16662 | 1.79273 | 0.218  | 0.063 | 0.086 | 0.477 | -0.595 | -7.77  | 18.31 | -4.68  | 2.05  | 14.3  |
| 5_15  | 1.32084 | 1.77292 | 0.034  | 0.076 | 0.108 | 0.526 | -0.54  | -8.195 | 8.28  | -3.84  | -0.73 | 18.84 |
| 12_10 | 1.29795 | 1.81966 | -0.15  | 0.097 | 0.074 | 0.823 | -0.643 | -7.359 | 34.57 | -1.93  | 25.44 | 12.12 |
| 10_21 | 1.27348 | 1.86335 | -0.089 | 0.092 | 0.106 | 0.521 | -0.607 | -7.625 | 33.95 | -7.61  | 17.15 | 21.44 |
| 7_3   | 1.26628 | 1.87128 | -0.097 | 0.078 | 0.087 | 0.436 | -0.573 | -8.07  | 32.21 | -1.99  | 17.41 | 22.16 |
| 5_7   | 1.35862 | 1.77736 | -0.252 | 0.104 | 0.171 | 0.524 | -0.527 | -9.207 | 39.89 | 2.81   | 42.46 | 29.43 |
| 18_7  | 1.26143 | 1.84272 | -0.225 | 0.09  | 0.121 | 0.546 | -0.579 | -8.592 | 38    | -4.78  | 31.66 | 30.39 |
| 2_20  | 1.26501 | 1.84938 | -0.094 | 0.081 | 0.057 | 0.555 | -0.607 | -6.843 | 29.71 | -14.09 | 12.66 | 25.77 |
| 5_13  | 1.13877 | 1.6777  | 0.19   | 0.055 | 0.134 | 0.486 | -0.532 | -8.105 | 16.77 | -1.49  | 10.48 | 13.89 |
| 8_6   | 1.3794  | 1.80423 | -0.255 | 0.086 | 0.176 | 0.605 | -0.516 | -8.529 | 32.94 | 8.48   | 32.72 | 22.14 |
| 12_19 | 1.29153 | 1.84004 | -0.132 | 0.096 | 0.081 | 0.825 | -0.643 | -7.379 | 31.17 | -2.47  | 22.38 | 15.02 |
| 11_22 | 1.27091 | 1.85167 | -0.101 | 0.091 | 0.099 | 0.486 | -0.549 | -7.656 | 32.26 | -11.12 | 21.73 | 25.05 |
| 11_3  | 1.25517 | 1.86175 | -0.07  | 0.083 | 0.062 | 0.474 | -0.586 | -7.822 | 31.52 | -13.11 | 20.61 | 30.22 |
| 2_16  | 1.27168 | 1.8669  | -0.096 | 0.089 | 0.074 | 0.555 | -0.615 | -7.246 | 29.48 | -16.16 | 16.69 | 26.08 |
| 1_14  | 1.07891 | 1.63876 | 0.201  | 0.045 | 0.083 | 0.323 | -0.589 | -7.833 | 17.46 | -14.46 | 7.7   | 25.86 |
| 9_3   | 1.25456 | 1.85302 | -0.069 | 0.086 | 0.107 | 0.442 | -0.559 | -8.182 | 30.82 | -8.27  | 19.84 | 27.82 |
| 19_14 | 0.88726 | 1.74883 | 0.226  | 0.045 | 0.086 | 0.497 | -0.583 | -7.804 | 18.49 | -9.74  | 7.4   | 24.69 |
| 5_4   | 1.29004 | 1.74791 | 0.316  | 0.022 | 0.136 | 0.456 | -0.527 | -8.517 | 20.21 | 0.06   | 26.16 | 10.98 |
| 12_15 | 1.29358 | 1.83081 | 0.048  | 0.061 | 0.038 | 0.8   | -0.642 | -7.535 | 8.87  | -9.18  | 2.78  | 19.34 |
| 18_21 | 1.25758 | 1.85112 | -0.099 | 0.091 | 0.108 | 0.552 | -0.586 | -7.654 | 33.66 | -6.97  | 18.69 | 23.78 |
| 11_21 | 1.27896 | 1.85107 | -0.084 | 0.099 | 0.132 | 0.49  | -0.567 | -7.754 | 33.28 | -10.24 | 20.79 | 25.82 |
| 4_17  | 1.30909 | 1.80297 | -0.15  | 0.099 | 0.118 | 0.909 | -0.595 | -7.465 | 28.97 | -2.15  | 21.57 | 14.61 |
| 1_9   | 1.34982 | 1.58684 | -0.236 | 0.118 | 0.156 | 0.387 | -0.566 | -8.693 | 34.13 | -8.04  | 35.57 | 30.92 |
| 3_1   | 1.2927  | 1.79911 | -0.331 | 0.075 | 0.03  | 0.549 | -0.603 | -7.963 | 35.24 | -15.24 | 27.2  | 25.62 |
| 5_11  | 1.33626 | 1.77852 | -0.19  | 0.114 | 0.159 | 0.537 | -0.527 | -8.138 | 29.85 | 0.52   | 21.57 | 17.78 |
| 8_17  | 1.30007 | 1.79899 | -0.121 | 0.118 | 0.162 | 0.629 | -0.536 | -7.682 | 28.65 | 2.82   | 12.5  | 18.15 |

|       |         |         |        |        |        |       |        |        |       |        |       |       |
|-------|---------|---------|--------|--------|--------|-------|--------|--------|-------|--------|-------|-------|
| 15_11 | 1.29187 | 1.85063 | -0.168 | 0.087  | 0.065  | 0.699 | -0.66  | -7.54  | 28.65 | -13.51 | 25.21 | 27.14 |
| 6_8   | 1.35521 | 1.75774 | -0.02  | 0.098  | 0.241  | 0.469 | -0.481 | -9.618 | 36.5  | 7.56   | 44.5  | 33.07 |
| 2_21  | 1.27957 | 1.85771 | -0.102 | 0.094  | 0.102  | 0.561 | -0.608 | -7.618 | 31.43 | -13.35 | 19.12 | 24.8  |
| 7_13  | 1.09702 | 1.7428  | 0.211  | 0.044  | 0.128  | 0.399 | -0.548 | -8.08  | 16.73 | 0.62   | 2.66  | 14.01 |
| 20_10 | 1.23001 | 1.85777 | -0.122 | 0.089  | 0.069  | 0.545 | -0.605 | -7.318 | 35.07 | -11.52 | 18.63 | 25.9  |
| 22_4  | 1.27273 | 1.87346 | 0.343  | 0.027  | 0.085  | 0.456 | -0.589 | -7.94  | 21.57 | -3.76  | 22.24 | 12.27 |
| 3_20  | 1.26486 | 1.85643 | -0.085 | 0.082  | 0.054  | 0.572 | -0.603 | -6.834 | 27.92 | -13.58 | 9.46  | 26.07 |
| 19_15 | 1.11553 | 1.87668 | 0.081  | 0.052  | 0.05   | 0.519 | -0.588 | -7.457 | 7.69  | -16.92 | 0.59  | 28.96 |
| 14_3  | 1.28919 | 1.82042 | -0.117 | 0.085  | 0.044  | 0.818 | -0.632 | -7.75  | 30.42 | -5.79  | 24.55 | 19.5  |
| 14_5  | 1.36832 | 1.809   | -0.168 | 0.058  | 0.103  | 0.799 | -0.606 | -8.08  | 25.44 | -1.92  | 28.07 | 11.3  |
| 10_12 | 1.23079 | 1.86983 | 0.239  | 0.034  | 0.055  | 0.465 | -0.611 | -7.697 | 15.43 | -11.78 | 4.71  | 21    |
| 13_3  | 1.28882 | 1.82461 | -0.117 | 0.084  | 0.042  | 0.819 | -0.633 | -7.725 | 30.32 | -6.33  | 24.79 | 20.12 |
| 9_11  | 1.31242 | 1.84677 | -0.148 | 0.11   | 0.165  | 0.462 | -0.526 | -8.219 | 28.71 | -2.85  | 19.54 | 22.39 |
| 11_20 | 1.26475 | 1.84196 | -0.072 | 0.09   | 0.098  | 0.481 | -0.578 | -6.956 | 26.79 | -13.55 | 13.95 | 25.57 |
| 1_3   | 1.26064 | 1.68804 | -0.103 | 0.081  | 0.041  | 0.36  | -0.612 | -7.706 | 30.91 | -18.02 | 16.05 | 32.75 |
| 15_16 | 1.27231 | 1.82495 | -0.094 | 0.068  | 0.026  | 0.693 | -0.669 | -7.022 | 33.52 | -14.39 | 24.8  | 26.22 |
| 10_3  | 1.25116 | 1.88317 | -0.075 | 0.074  | 0.033  | 0.507 | -0.624 | -7.642 | 31.81 | -11.81 | 18.9  | 27.85 |
| 2_2   | 1.26428 | 1.71775 | -0.102 | 0.078  | 0.027  | 0.54  | -0.624 | -7.609 | 30.67 | -17.94 | 20.98 | 25.76 |
| 4_6   | 1.38613 | 1.8006  | -0.288 | 0.067  | 0.131  | 0.888 | -0.579 | -8.281 | 29.67 | 1.79   | 35.16 | 14.19 |
| 2_7   | 1.33371 | 1.86615 | -0.23  | 0.091  | 0.109  | 0.557 | -0.596 | -8.668 | 35.08 | -10.11 | 36.91 | 30.66 |
| 6_3   | 1.28731 | 1.75275 | -0.122 | 0.093  | 0.106  | 0.499 | -0.54  | -8.141 | 32.34 | -1.21  | 18.63 | 20.21 |
| 13_5  | 1.36768 | 1.81256 | -0.167 | 0.057  | 0.101  | 0.8   | -0.607 | -8.058 | 25.38 | -2.61  | 28.61 | 11.58 |
| 20_21 | 1.26473 | 1.84884 | -0.097 | 0.09   | 0.096  | 0.552 | -0.596 | -7.516 | 34.38 | -8.31  | 17.36 | 23.69 |
| 15_15 | 1.19376 | 1.86041 | 0.074  | 0.035  | -0.001 | 0.674 | -0.675 | -7.228 | 10.96 | -22.19 | 5.28  | 32.55 |
| 6_21  | 1.30548 | 1.75446 | -0.127 | 0.106  | 0.164  | 0.494 | -0.528 | -7.985 | 34.04 | 0.97   | 19.2  | 20.22 |
| 7_10  | 1.28393 | 1.86608 | -0.136 | 0.091  | 0.126  | 0.444 | -0.559 | -7.743 | 34.82 | 1.37   | 15.02 | 19.91 |
| 20_2  | 1.21514 | 1.8514  | -0.088 | 0.072  | 0.024  | 0.53  | -0.613 | -7.513 | 33.63 | -14.43 | 18.07 | 26.6  |
| 15_4  | 1.21631 | 1.8338  | 0.34   | -0.015 | 0.025  | 0.628 | -0.659 | -7.763 | 15.87 | -13.68 | 17.35 | 23.86 |
| 10_19 | 1.2793  | 1.87681 | -0.091 | 0.089  | 0.094  | 0.519 | -0.614 | -7.316 | 27.35 | -12.89 | 16.89 | 25.11 |
| 1_10  | 1.27834 | 1.71913 | -0.144 | 0.096  | 0.082  | 0.368 | -0.598 | -7.445 | 33.75 | -16.31 | 19.18 | 27.79 |
| 13_10 | 1.30124 | 1.81063 | -0.153 | 0.099  | 0.086  | 0.824 | -0.623 | -7.449 | 32.91 | -4.13  | 26.49 | 14.28 |
| 13_19 | 1.31423 | 1.82597 | -0.129 | 0.098  | 0.105  | 0.829 | -0.624 | -7.354 | 27.91 | -6.11  | 21.56 | 16.6  |
| 9_8   | 1.33715 | 1.85025 | 0.017  | 0.095  | 0.24   | 0.452 | -0.482 | -9.681 | 35.9  | 4.46   | 44.49 | 34.76 |
| 15_13 | 1.16203 | 1.69313 | 0.221  | 0.021  | 0.021  | 0.647 | -0.662 | -7.465 | 15.58 | -14.49 | 11.84 | 27.87 |
| 21_2  | 1.21305 | 1.86019 | -0.089 | 0.075  | 0.046  | 0.527 | -0.598 | -7.802 | 33.5  | -11.93 | 20.78 | 25.1  |
| 20_19 | 1.28458 | 1.85441 | -0.105 | 0.086  | 0.073  | 0.546 | -0.6   | -7.343 | 31.15 | -10.94 | 16.65 | 24.88 |
| 13_20 | 1.29593 | 1.83388 | -0.116 | 0.092  | 0.08   | 0.825 | -0.625 | -6.873 | 27.87 | -4.39  | 17.48 | 15.1  |
| 9_5   | 1.34427 | 1.85057 | -0.136 | 0.061  | 0.163  | 0.429 | -0.526 | -8.502 | 28.6  | -2.72  | 26.34 | 18.99 |
| 22_17 | 1.28606 | 1.86678 | -0.095 | 0.11   | 0.099  | 0.521 | -0.612 | -7.189 | 28.17 | -9.63  | 10.21 | 18.66 |
| 4_21  | 1.31622 | 1.80108 | -0.156 | 0.107  | 0.141  | 0.915 | -0.589 | -7.901 | 33.59 | 0.08   | 28.21 | 16.97 |
| 3_9   | 1.34378 | 1.87368 | -0.218 | 0.107  | 0.138  | 0.592 | -0.571 | -8.552 | 33.03 | 3.85   | 23.2  | 23.71 |
| 14_10 | 1.30158 | 1.80733 | -0.153 | 0.099  | 0.088  | 0.824 | -0.622 | -7.469 | 33.14 | -4.5   | 26.9  | 15.02 |
| 2_5   | 1.33863 | 1.87588 | -0.14  | 0.049  | 0.087  | 0.53  | -0.593 | -7.95  | 26.36 | -10.73 | 23.69 | 21.31 |
| 14_9  | 1.37072 | 1.8079  | -0.241 | 0.121  | 0.165  | 0.838 | -0.599 | -8.436 | 32.67 | 2.47   | 35.6  | 23.64 |

|       |         |         |        |       |       |       |        |        |       |        |       |       |
|-------|---------|---------|--------|-------|-------|-------|--------|--------|-------|--------|-------|-------|
| 11_16 | 1.26968 | 1.85732 | -0.077 | 0.094 | 0.107 | 0.483 | -0.575 | -7.377 | 29.97 | -12.55 | 17.48 | 24.94 |
| 10_14 | 1.05306 | 1.70566 | 0.231  | 0.039 | 0.073 | 0.47  | -0.6   | -7.771 | 16.96 | -8.91  | 7.08  | 19.71 |
| 3_5   | 1.33549 | 1.87891 | -0.13  | 0.045 | 0.076 | 0.546 | -0.58  | -7.911 | 28.47 | 0.72   | 13.55 | 14.76 |
| 20_6  | 1.29538 | 1.84265 | -0.211 | 0.049 | 0.083 | 0.521 | -0.587 | -7.708 | 29.39 | -9.29  | 24.19 | 23.21 |
| 16_5  | 1.30258 | 1.86381 | -0.134 | 0.049 | 0.094 | 0.52  | -0.581 | -7.963 | 28.97 | -7.96  | 21.42 | 22.5  |
| 11_13 | 1.11882 | 1.72079 | 0.236  | 0.047 | 0.099 | 0.439 | -0.563 | -7.944 | 16.84 | -10.84 | 10.22 | 21.76 |
| 18_17 | 1.24928 | 1.852   | -0.094 | 0.084 | 0.079 | 0.545 | -0.593 | -7.289 | 30.5  | -9.86  | 14.78 | 21.95 |
| 6_16  | 1.29821 | 1.75418 | -0.122 | 0.103 | 0.142 | 0.497 | -0.532 | -7.593 | 29.54 | -1.91  | 14.48 | 16.38 |
| 3_8   | 1.32524 | 1.87079 | 0.011  | 0.088 | 0.173 | 0.561 | -0.545 | -9.048 | 32.6  | 5.46   | 39.64 | 25.76 |
| 8_5   | 1.37313 | 1.80292 | -0.174 | 0.085 | 0.18  | 0.604 | -0.515 | -8.613 | 30.41 | 7.59   | 31.23 | 19.7  |
| 1_4   | 1.26271 | 1.59794 | 0.325  | 0.01  | 0.082 | 0.3   | -0.583 | -8.12  | 20.97 | -13.75 | 28.45 | 24.26 |
| 17_15 | 1.18255 | 1.87031 | 0.081  | 0.05  | 0.045 | 0.521 | -0.602 | -7.442 | 8.52  | -14.72 | 0.63  | 27.96 |
| 21_13 | 1.0242  | 1.81482 | 0.226  | 0.041 | 0.09  | 0.497 | -0.58  | -7.972 | 16.07 | -9.22  | 7.11  | 23.12 |
| 19_9  | 1.25236 | 1.84767 | -0.218 | 0.117 | 0.162 | 0.571 | -0.548 | -8.631 | 32.52 | -5.26  | 25.14 | 28.75 |
| 12_5  | 1.36367 | 1.82672 | -0.164 | 0.055 | 0.088 | 0.798 | -0.627 | -7.954 | 26.43 | 1.29   | 26.09 | 9.61  |
| 18_20 | 1.2573  | 1.84472 | -0.09  | 0.082 | 0.07  | 0.543 | -0.594 | -6.916 | 29.08 | -10.34 | 9.63  | 23.44 |
| 10_16 | 1.26513 | 1.8748  | -0.083 | 0.087 | 0.08  | 0.516 | -0.613 | -7.256 | 29.9  | -11.37 | 14.1  | 22.64 |
| 1_17  | 1.27475 | 1.86209 | -0.109 | 0.091 | 0.087 | 0.367 | -0.6   | -7.274 | 30.95 | -14.55 | 13.7  | 27.48 |
| 17_8  | 1.28136 | 1.85453 | 0.01   | 0.089 | 0.182 | 0.538 | -0.543 | -8.711 | 33.25 | -1.98  | 36.15 | 30.18 |
| 17_5  | 1.30209 | 1.85776 | -0.134 | 0.048 | 0.094 | 0.52  | -0.581 | -7.981 | 28.27 | -8.23  | 21.52 | 22.88 |
| 17_1  | 1.25792 | 1.8748  | -0.33  | 0.076 | 0.05  | 0.522 | -0.603 | -8.062 | 36.92 | -11.62 | 26.58 | 22.51 |
| 5_5   | 1.36839 | 1.78386 | -0.176 | 0.064 | 0.154 | 0.501 | -0.527 | -8.408 | 28.64 | 0.8    | 27.95 | 14.33 |
| 5_8   | 1.35536 | 1.77581 | -0.02  | 0.098 | 0.237 | 0.515 | -0.489 | -9.622 | 36.36 | 5.5    | 44.25 | 32.66 |
| 4_3   | 1.29742 | 1.81112 | -0.15  | 0.09  | 0.073 | 0.901 | -0.606 | -8.017 | 31.74 | -3.6   | 26.52 | 20.35 |
| 11_4  | 1.25897 | 1.86827 | 0.36   | 0.011 | 0.1   | 0.418 | -0.557 | -8.229 | 20.71 | -9.47  | 27.3  | 19.56 |
| 16_21 | 1.27554 | 1.85498 | -0.098 | 0.092 | 0.105 | 0.553 | -0.59  | -7.607 | 34.52 | -7.63  | 19.21 | 23.58 |
| 17_21 | 1.27489 | 1.85382 | -0.098 | 0.091 | 0.104 | 0.553 | -0.59  | -7.622 | 34.64 | -7.79  | 19.65 | 24.35 |
| 11_1  | 1.29207 | 1.68446 | -0.317 | 0.084 | 0.076 | 0.461 | -0.576 | -8.249 | 37.13 | -12.21 | 32.92 | 24.68 |
| 21_5  | 1.28721 | 1.85155 | -0.136 | 0.05  | 0.108 | 0.517 | -0.571 | -8.115 | 29.57 | -6.4   | 21.85 | 22.25 |
| 20_7  | 1.2871  | 1.84209 | -0.223 | 0.088 | 0.108 | 0.544 | -0.591 | -7.875 | 37.16 | -6.72  | 29.69 | 29.82 |
| 6_2   | 1.29244 | 1.76133 | -0.133 | 0.094 | 0.108 | 0.486 | -0.541 | -8.153 | 33.75 | -1.57  | 18.87 | 14.96 |
| 12_11 | 1.33333 | 1.8343  | -0.189 | 0.107 | 0.105 | 0.829 | -0.63  | -7.753 | 29.02 | 0.42   | 22.75 | 11.98 |
| 7_16  | 1.28021 | 1.86512 | -0.101 | 0.09  | 0.128 | 0.444 | -0.56  | -7.561 | 30.26 | 0.07   | 10.21 | 17.77 |
| 20_13 | 1.05812 | 1.80405 | 0.227  | 0.037 | 0.067 | 0.5   | -0.595 | -7.694 | 16.88 | -11.13 | 7.65  | 23.31 |
| 21_4  | 1.20847 | 1.85121 | 0.349  | 0.006 | 0.089 | 0.476 | -0.573 | -8.196 | 19.57 | -6.54  | 24.62 | 18.97 |
| 11_12 | 1.24231 | 1.83488 | 0.243  | 0.043 | 0.083 | 0.433 | -0.575 | -7.879 | 15.45 | -12.99 | 9.14  | 23.19 |
| 12_4  | 1.28055 | 1.76996 | 0.324  | 0.005 | 0.063 | 0.758 | -0.625 | -8.04  | 18.62 | -0.13  | 20.35 | 8.33  |
| 4_22  | 1.31025 | 1.79838 | -0.172 | 0.099 | 0.118 | 0.908 | -0.571 | -7.763 | 32.43 | -0.64  | 30.25 | 15.22 |
| 17_6  | 1.31309 | 1.85417 | -0.213 | 0.05  | 0.091 | 0.521 | -0.581 | -7.922 | 30.06 | -8.17  | 23.44 | 23.16 |
| 18_18 | 1.25435 | 1.84283 | -0.094 | 0.089 | 0.093 | 0.549 | -0.592 | -7.406 | 32.48 | -9.01  | 17.51 | 22.93 |
| 5_3   | 1.28697 | 1.77413 | -0.121 | 0.092 | 0.099 | 0.538 | -0.551 | -8.103 | 32.35 | -2.83  | 21.14 | 20.93 |
| 16_16 | 1.26901 | 1.86255 | -0.094 | 0.086 | 0.074 | 0.546 | -0.596 | -7.258 | 31.53 | -10.39 | 16.04 | 23.06 |
| 4_12  | 1.26561 | 1.77889 | 0.165  | 0.049 | 0.094 | 0.859 | -0.593 | -8.108 | 14.82 | -2.09  | 14.26 | 12.23 |
| 1_21  | 1.2826  | 1.86109 | -0.117 | 0.098 | 0.114 | 0.373 | -0.591 | -7.678 | 34.86 | -12.7  | 19.15 | 27.41 |

|       |         |         |        |        |       |       |        |        |       |        |       |       |
|-------|---------|---------|--------|--------|-------|-------|--------|--------|-------|--------|-------|-------|
| 16_12 | 1.19432 | 1.86204 | 0.232  | 0.036  | 0.058 | 0.496 | -0.6   | -7.711 | 15.25 | -12.78 | 4.84  | 24.95 |
| 1_16  | 1.27409 | 1.86262 | -0.11  | 0.093  | 0.087 | 0.367 | -0.599 | -7.301 | 31.3  | -15.58 | 13.65 | 27.6  |
| 13_15 | 1.22071 | 1.81657 | 0.042  | 0.069  | 0.058 | 0.801 | -0.622 | -7.803 | 8.26  | -7.23  | 2.45  | 18.96 |
| 13_9  | 1.37043 | 1.81164 | -0.241 | 0.12   | 0.164 | 0.838 | -0.6   | -8.543 | 32.59 | 2.23   | 34.97 | 22.82 |
| 4_16  | 1.30851 | 1.80462 | -0.151 | 0.1    | 0.118 | 0.909 | -0.595 | -7.5   | 30.11 | -1.77  | 22.48 | 14.88 |
| 8_12  | 1.27423 | 1.79646 | 0.195  | 0.072  | 0.15  | 0.58  | -0.534 | -8.371 | 15.97 | 2.39   | 4.81  | 13.61 |
| 2_17  | 1.27228 | 1.86215 | -0.095 | 0.087  | 0.074 | 0.555 | -0.615 | -7.22  | 28.57 | -15.89 | 15.8  | 26.1  |
| 3_10  | 1.27425 | 1.88109 | -0.126 | 0.088  | 0.058 | 0.574 | -0.599 | -7.34  | 35.31 | -5.9   | 14.38 | 20.18 |
| 13_14 | 1.01248 | 1.78259 | 0.194  | 0.047  | 0.082 | 0.78  | -0.612 | -7.883 | 16.85 | -5.02  | 14.5  | 13.73 |
| 18_10 | 1.20437 | 1.86313 | -0.124 | 0.09   | 0.081 | 0.545 | -0.595 | -7.435 | 34.96 | -10.37 | 18.36 | 25.62 |
| 9_22  | 1.27356 | 1.84315 | -0.099 | 0.091  | 0.141 | 0.456 | -0.52  | -7.911 | 30.93 | -5.53  | 18.44 | 21.8  |
| 3_4   | 1.25435 | 1.86619 | 0.35   | -0.001 | 0.055 | 0.506 | -0.579 | -7.974 | 20.77 | -7.91  | 20.64 | 19.67 |
| 22_6  | 1.36082 | 1.86208 | -0.212 | 0.072  | 0.103 | 0.496 | -0.589 | -7.827 | 31.02 | -3.11  | 22.29 | 14.69 |
| 17_9  | 1.30876 | 1.85208 | -0.216 | 0.111  | 0.149 | 0.565 | -0.57  | -8.567 | 33.86 | -3.7   | 25.05 | 27.81 |
| 15_19 | 1.28521 | 1.83457 | -0.106 | 0.072  | 0.036 | 0.693 | -0.667 | -7.142 | 31.19 | -14.38 | 24.13 | 27.15 |
| 12_13 | 1.1207  | 1.74413 | 0.197  | 0.043  | 0.065 | 0.779 | -0.631 | -7.835 | 16.03 | -1.51  | 11.65 | 9.62  |
| 4_4   | 1.29988 | 1.62478 | 0.285  | 0.018  | 0.114 | 0.842 | -0.577 | -8.486 | 20.01 | 1.85   | 29.19 | 10.97 |
| 20_11 | 1.25754 | 1.84399 | -0.163 | 0.099  | 0.097 | 0.554 | -0.588 | -7.634 | 29.35 | -9.32  | 18.05 | 24.8  |
| 22_8  | 1.3401  | 1.86524 | 0.008  | 0.109  | 0.194 | 0.516 | -0.548 | -8.944 | 33.42 | 2.17   | 36.04 | 26.93 |
| 12_17 | 1.29737 | 1.83795 | -0.117 | 0.092  | 0.077 | 0.825 | -0.644 | -7.181 | 31.09 | -1.96  | 21.25 | 13.14 |
| 12_9  | 1.36703 | 1.82849 | -0.24  | 0.119  | 0.154 | 0.836 | -0.62  | -8.645 | 33.52 | 4.16   | 36.5  | 15.07 |
| 21_17 | 1.26267 | 1.85609 | -0.092 | 0.085  | 0.087 | 0.542 | -0.588 | -7.354 | 30.35 | -9.44  | 12.59 | 26.66 |
| 7_20  | 1.27531 | 1.85415 | -0.096 | 0.084  | 0.122 | 0.442 | -0.564 | -7.1   | 25.49 | -5.69  | 7.23  | 21.53 |
| 3_21  | 1.27689 | 1.86186 | -0.096 | 0.091  | 0.091 | 0.579 | -0.595 | -7.596 | 34.81 | -4.74  | 13.84 | 21.49 |
| 17_2  | 1.26257 | 1.87577 | -0.088 | 0.076  | 0.03  | 0.526 | -0.618 | -7.65  | 28.22 | -18.21 | 20.76 | 25.64 |
| 2_14  | 1.05377 | 1.67011 | 0.217  | 0.038  | 0.062 | 0.512 | -0.592 | -7.769 | 17.1  | -13.73 | 10.43 | 24.72 |
| 9_21  | 1.28035 | 1.8424  | -0.082 | 0.101  | 0.167 | 0.458 | -0.539 | -8.036 | 32.47 | -4.17  | 18.73 | 24.64 |
| 15_12 | 1.26151 | 1.8422  | 0.23   | 0.015  | 0     | 0.644 | -0.669 | -7.372 | 13.8  | -16.78 | 10.8  | 26.01 |
| 2_8   | 1.32712 | 1.86598 | 0.006  | 0.092  | 0.181 | 0.545 | -0.557 | -9.091 | 32.02 | -3.97  | 34.31 | 28.48 |
| 11_5  | 1.3404  | 1.85602 | -0.13  | 0.057  | 0.118 | 0.461 | -0.555 | -8.14  | 27.94 | -8.82  | 27.11 | 21.48 |
| 3_16  | 1.26917 | 1.8724  | -0.089 | 0.086  | 0.063 | 0.573 | -0.601 | -7.225 | 30.31 | -12.68 | 12.37 | 25.27 |
| 5_2   | 1.29239 | 1.77337 | -0.132 | 0.093  | 0.102 | 0.526 | -0.552 | -8.113 | 33    | -4.31  | 23.38 | 15.12 |
| 13_13 | 1.09279 | 1.80287 | 0.195  | 0.047  | 0.08  | 0.78  | -0.612 | -7.906 | 18.1  | -3.38  | 13.68 | 12.68 |
| 22_9  | 1.35895 | 1.86243 | -0.222 | 0.131  | 0.158 | 0.544 | -0.577 | -8.504 | 35.28 | 1.98   | 27.24 | 24.56 |
| 15_14 | 1.10354 | 1.6589  | 0.219  | 0.021  | 0.022 | 0.647 | -0.661 | -7.483 | 14.81 | -15.27 | 11.99 | 25.81 |
| 21_22 | 1.26362 | 1.85339 | -0.115 | 0.083  | 0.082 | 0.547 | -0.565 | -7.628 | 32.11 | -7.92  | 16.02 | 21.52 |
| 21_14 | 0.97797 | 1.79907 | 0.225  | 0.041  | 0.091 | 0.497 | -0.58  | -7.908 | 15.73 | -9.31  | 6.89  | 23.04 |
| 22_16 | 1.28553 | 1.87026 | -0.096 | 0.111  | 0.098 | 0.521 | -0.611 | -7.213 | 28.92 | -10.05 | 11.53 | 18.9  |
| 10_4  | 1.25136 | 1.81732 | 0.356  | 0.002  | 0.071 | 0.449 | -0.594 | -8.037 | 20.82 | -6.85  | 22.39 | 16.33 |
| 11_17 | 1.27035 | 1.8543  | -0.076 | 0.093  | 0.107 | 0.483 | -0.576 | -7.348 | 28.94 | -12.71 | 16.89 | 25.06 |
| 18_3  | 1.18104 | 1.85753 | -0.084 | 0.076  | 0.041 | 0.537 | -0.607 | -7.697 | 32.17 | -13.22 | 17.58 | 32.59 |
| 15_22 | 1.27597 | 1.81374 | -0.114 | 0.068  | 0.028 | 0.697 | -0.655 | -7.272 | 33.61 | -14.52 | 28.3  | 26.56 |
| 8_2   | 1.29401 | 1.77855 | -0.134 | 0.113  | 0.127 | 0.614 | -0.548 | -8.303 | 34.73 | 1.85   | 21.35 | 17.56 |
| 21_15 | 1.16889 | 1.8644  | 0.08   | 0.052  | 0.059 | 0.517 | -0.593 | -7.573 | 8.26  | -16.99 | -0.14 | 30.3  |



|       |         |         |        |       |        |       |        |        |       |        |       |       |
|-------|---------|---------|--------|-------|--------|-------|--------|--------|-------|--------|-------|-------|
| 5_17  | 1.29289 | 1.76829 | -0.125 | 0.097 | 0.133  | 0.536 | -0.542 | -7.585 | 29.87 | -2.12  | 16.19 | 17.02 |
| 14_19 | 1.31446 | 1.8221  | -0.129 | 0.098 | 0.106  | 0.829 | -0.623 | -7.372 | 27.9  | -5.76  | 22.06 | 16.78 |
| 7_22  | 1.28695 | 1.86218 | -0.123 | 0.088 | 0.127  | 0.448 | -0.529 | -7.77  | 30.42 | -0.08  | 15.08 | 15.5  |
| 17_14 | 0.98443 | 1.79003 | 0.225  | 0.039 | 0.077  | 0.5   | -0.589 | -7.857 | 16.59 | -10.18 | 7.64  | 23.62 |
| 18_12 | 1.15585 | 1.83461 | 0.231  | 0.036 | 0.064  | 0.495 | -0.596 | -7.768 | 14.83 | -12.65 | 5.49  | 25    |
| 9_20  | 1.26388 | 1.83422 | -0.069 | 0.091 | 0.14   | 0.448 | -0.551 | -7.162 | 24.73 | -7.91  | 10.06 | 23.45 |
| 2_4   | 1.25754 | 1.69827 | 0.343  | 0.004 | 0.066  | 0.489 | -0.594 | -8.015 | 19.46 | -12.81 | 25.27 | 22.05 |
| 4_11  | 1.34591 | 1.8055  | -0.22  | 0.115 | 0.141  | 0.915 | -0.581 | -8.095 | 29.37 | 1.32   | 28.22 | 16.97 |
| 3_2   | 1.26269 | 1.87663 | -0.097 | 0.074 | 0.015  | 0.559 | -0.609 | -7.569 | 32.29 | -10.83 | 15.31 | 22.28 |
| 14_4  | 1.21468 | 1.80102 | 0.322  | 0.01  | 0.08   | 0.758 | -0.605 | -8.095 | 19.13 | -2.02  | 23.2  | 11.12 |
| 1_11  | 1.31388 | 1.60861 | -0.183 | 0.106 | 0.111  | 0.377 | -0.581 | -7.828 | 28.37 | -11.7  | 17.07 | 25.16 |
| 12_14 | 1.06475 | 1.71018 | 0.196  | 0.043 | 0.066  | 0.779 | -0.631 | -7.802 | 16.06 | -1.56  | 11.86 | 9.73  |
| 6_14  | 1.02509 | 1.66427 | 0.187  | 0.057 | 0.142  | 0.439 | -0.523 | -8.049 | 16.65 | -0.43  | 8.21  | 13.45 |
| 6_1   | 1.31994 | 1.72915 | -0.361 | 0.097 | 0.119  | 0.475 | -0.53  | -8.612 | 39.64 | -1.26  | 29.68 | 19.46 |
| 14_13 | 1.07802 | 1.80691 | 0.195  | 0.047 | 0.082  | 0.78  | -0.611 | -7.925 | 17.61 | -3.8   | 15.84 | 12.84 |
| 10_10 | 1.26882 | 1.86372 | -0.118 | 0.09  | 0.075  | 0.515 | -0.612 | -7.386 | 34.13 | -10.55 | 18.88 | 22.43 |
| 7_11  | 1.32087 | 1.86679 | -0.175 | 0.103 | 0.15   | 0.455 | -0.54  | -8.135 | 29.03 | 4.96   | 18.27 | 19.81 |
| 9_10  | 1.27398 | 1.85862 | -0.109 | 0.098 | 0.142  | 0.45  | -0.546 | -7.831 | 32.94 | -6.3   | 19.55 | 24.64 |
| 9_14  | 1.04431 | 1.68641 | 0.235  | 0.051 | 0.147  | 0.407 | -0.536 | -8.061 | 15.97 | -5.11  | 8     | 18.93 |
| 13_12 | 1.18023 | 1.81734 | 0.201  | 0.042 | 0.062  | 0.776 | -0.62  | -7.769 | 15.15 | -5.46  | 13.21 | 14.11 |
| 8_11  | 1.33973 | 1.80498 | -0.193 | 0.13  | 0.182  | 0.64  | -0.515 | -8.298 | 30.67 | 7.33   | 25.36 | 23.96 |
| 8_10  | 1.30215 | 1.79631 | -0.156 | 0.122 | 0.155  | 0.629 | -0.534 | -7.924 | 34.34 | 4.82   | 20.4  | 21.96 |
| 13_16 | 1.30017 | 1.82901 | -0.121 | 0.096 | 0.09   | 0.826 | -0.623 | -7.287 | 29.19 | -5.06  | 21.93 | 14.64 |
| 9_13  | 1.12628 | 1.71969 | 0.237  | 0.051 | 0.145  | 0.407 | -0.536 | -8.139 | 16.42 | -5.78  | 8.14  | 19.81 |
| 9_6   | 1.35131 | 1.8411  | -0.218 | 0.063 | 0.16   | 0.43  | -0.526 | -8.422 | 30.45 | -1.93  | 27.14 | 19.73 |
| 7_6   | 1.35834 | 1.86139 | -0.239 | 0.056 | 0.143  | 0.422 | -0.54  | -8.329 | 30.61 | 3.62   | 25.46 | 18.21 |
| 5_21  | 1.30602 | 1.77159 | -0.126 | 0.105 | 0.159  | 0.538 | -0.538 | -7.959 | 33.27 | -1.25  | 21.71 | 19.54 |
| 12_6  | 1.37134 | 1.83871 | -0.245 | 0.057 | 0.085  | 0.8   | -0.627 | -7.891 | 27.72 | 0.8    | 27.35 | 9.97  |
| 10_18 | 1.26964 | 1.85359 | -0.085 | 0.089 | 0.088  | 0.518 | -0.612 | -7.377 | 31.13 | -10.25 | 15.99 | 21.78 |
| 8_1   | 1.32307 | 1.687   | -0.367 | 0.113 | 0.136  | 0.609 | -0.535 | -8.747 | 42.43 | 4.74   | 38.09 | 23.67 |
| 22_19 | 1.29139 | 1.86646 | -0.113 | 0.107 | 0.094  | 0.523 | -0.604 | -7.409 | 32.35 | -6.07  | 12.02 | 20.76 |
| 20_4  | 1.20243 | 1.84073 | 0.349  | 0.001 | 0.064  | 0.479 | -0.588 | -7.757 | 19.02 | -9.18  | 24.26 | 20.6  |
| 16_7  | 1.30042 | 1.859   | -0.225 | 0.09  | 0.115  | 0.547 | -0.583 | -8.639 | 37.47 | -5.6   | 29.89 | 30.14 |
| 14_18 | 1.30408 | 1.83019 | -0.123 | 0.098 | 0.1    | 0.828 | -0.621 | -7.429 | 30.57 | -3.83  | 23.65 | 13.73 |
| 12_20 | 1.29277 | 1.8302  | -0.114 | 0.09  | 0.067  | 0.824 | -0.645 | -6.811 | 27.89 | -4.22  | 17.02 | 13.59 |
| 6_15  | 1.32192 | 1.74997 | 0.032  | 0.077 | 0.115  | 0.49  | -0.529 | -8.211 | 7.57  | -4.53  | -1.09 | 19.86 |
| 2_1   | 1.29366 | 1.66193 | -0.335 | 0.077 | 0.041  | 0.531 | -0.616 | -8.016 | 34.77 | -17.24 | 31.7  | 25.12 |
| 5_6   | 1.375   | 1.77637 | -0.257 | 0.066 | 0.151  | 0.503 | -0.527 | -8.329 | 30.41 | 0.96   | 29.51 | 15.99 |
| 9_18  | 1.2739  | 1.82314 | -0.076 | 0.098 | 0.152  | 0.453 | -0.545 | -7.76  | 30.73 | -4.66  | 15.5  | 23.08 |
| 14_2  | 1.29488 | 1.80197 | -0.129 | 0.086 | 0.046  | 0.81  | -0.631 | -7.76  | 31.92 | -6.73  | 29.19 | 15.51 |
| 15_2  | 1.23816 | 1.85493 | -0.096 | 0.056 | -0.017 | 0.681 | -0.679 | -7.377 | 32.25 | -17.59 | 33.5  | 27.04 |
| 10_7  | 1.32907 | 1.87713 | -0.219 | 0.089 | 0.113  | 0.516 | -0.595 | -8.685 | 36.74 | -4.53  | 39.01 | 26.12 |
| 16_6  | 1.31376 | 1.85826 | -0.213 | 0.051 | 0.091  | 0.521 | -0.581 | -7.904 | 29.91 | -8.45  | 23.78 | 23.27 |
| 17_3  | 1.22419 | 1.8672  | -0.083 | 0.075 | 0.035  | 0.537 | -0.611 | -7.664 | 32.4  | -12.76 | 16.53 | 31.62 |

|       |         |         |        |       |       |       |        |        |       |        |       |       |
|-------|---------|---------|--------|-------|-------|-------|--------|--------|-------|--------|-------|-------|
| 18_15 | 1.14012 | 1.86007 | 0.081  | 0.051 | 0.05  | 0.52  | -0.598 | -7.47  | 7.89  | -13.69 | 0.19  | 26.9  |
| 21_18 | 1.27198 | 1.84938 | -0.093 | 0.089 | 0.099 | 0.545 | -0.587 | -7.484 | 32.77 | -7.57  | 17.07 | 25.62 |
| 13_2  | 1.29455 | 1.80486 | -0.128 | 0.086 | 0.044 | 0.81  | -0.632 | -7.736 | 32.48 | -6.24  | 28.76 | 15.25 |
| 13_17 | 1.30063 | 1.83201 | -0.119 | 0.094 | 0.089 | 0.827 | -0.624 | -7.257 | 30.25 | -3.55  | 21.4  | 14.58 |
| 13_8  | 1.35052 | 1.80177 | -0.012 | 0.101 | 0.199 | 0.814 | -0.575 | -8.559 | 32.99 | 4.79   | 43.17 | 27.06 |
| 21_8  | 1.27172 | 1.8499  | 0.008  | 0.09  | 0.194 | 0.537 | -0.532 | -9.24  | 33.72 | -0.41  | 35.81 | 30.16 |
| 2_18  | 1.27573 | 1.82915 | -0.098 | 0.09  | 0.083 | 0.557 | -0.613 | -7.366 | 31.06 | -14.64 | 17.75 | 25.9  |
| 7_4   | 1.27174 | 1.84843 | 0.336  | 0.01  | 0.13  | 0.377 | -0.542 | -8.523 | 22.06 | 1.95   | 29.71 | 13.77 |
| 15_5  | 1.31371 | 1.8525  | -0.138 | 0.032 | 0.046 | 0.667 | -0.658 | -7.705 | 24.74 | -13.04 | 23.73 | 25.2  |
| 17_16 | 1.26798 | 1.86005 | -0.093 | 0.085 | 0.073 | 0.546 | -0.596 | -7.276 | 31.56 | -10.89 | 16.43 | 24.06 |
| 9_7   | 1.33713 | 1.84476 | -0.212 | 0.1   | 0.176 | 0.456 | -0.523 | -9.269 | 41.69 | 2.02   | 50.93 | 30.79 |
| 21_16 | 1.25995 | 1.85806 | -0.093 | 0.086 | 0.087 | 0.542 | -0.587 | -7.378 | 31.25 | -9.34  | 13.19 | 22.66 |
| 19_22 | 1.19871 | 1.8583  | -0.112 | 0.088 | 0.084 | 0.543 | -0.571 | -7.602 | 32.21 | -10.19 | 17.63 | 22.47 |
| 14_16 | 1.3006  | 1.82538 | -0.121 | 0.096 | 0.091 | 0.826 | -0.622 | -7.305 | 30.17 | -3.74  | 21.01 | 14.63 |
| 6_6   | 1.37485 | 1.76017 | -0.257 | 0.067 | 0.157 | 0.458 | -0.519 | -8.354 | 30.83 | 2.13   | 27.61 | 16.91 |
| 3_7   | 1.33245 | 1.87153 | -0.225 | 0.087 | 0.1   | 0.573 | -0.584 | -8.626 | 37.58 | 2.29   | 31.41 | 25.44 |
| 3_14  | 1.03688 | 1.71416 | 0.224  | 0.037 | 0.057 | 0.528 | -0.586 | -7.754 | 18.11 | -9.6   | 4.64  | 23.09 |
| 3_3   | 1.25668 | 1.88205 | -0.082 | 0.073 | 0.014 | 0.565 | -0.612 | -7.58  | 33.92 | -4.58  | 15.45 | 23.71 |
| 2_22  | 1.27099 | 1.86139 | -0.12  | 0.082 | 0.062 | 0.558 | -0.581 | -7.485 | 30.71 | -13.8  | 19.85 | 26.81 |
| 21_1  | 1.24308 | 1.86316 | -0.33  | 0.078 | 0.063 | 0.519 | -0.593 | -8.203 | 37.51 | -10.11 | 27.58 | 23.57 |
| 4_13  | 1.15464 | 1.68917 | 0.159  | 0.053 | 0.112 | 0.865 | -0.584 | -8.087 | 17.76 | -0.93  | 17    | 12.03 |
| 11_15 | 1.30017 | 1.86018 | 0.072  | 0.083 | 0.088 | 0.458 | -0.6   | -7.891 | 8.83  | -14.47 | 0.2   | 29.14 |
| 22_20 | 1.28108 | 1.85809 | -0.092 | 0.108 | 0.091 | 0.519 | -0.615 | -6.827 | 26.1  | -11.17 | 9.29  | 19.62 |
| 22_3  | 1.27265 | 1.87555 | -0.09  | 0.098 | 0.051 | 0.511 | -0.623 | -7.563 | 31.36 | -10.97 | 15.72 | 24.53 |
| 8_3   | 1.28753 | 1.80585 | -0.123 | 0.109 | 0.125 | 0.623 | -0.548 | -8.282 | 31.89 | 2.11   | 21.47 | 20.67 |
| 14_7  | 1.36098 | 1.81838 | -0.253 | 0.099 | 0.13  | 0.823 | -0.609 | -8.397 | 37.44 | 1.85   | 42.9  | 22.29 |
| 17_11 | 1.27507 | 1.85824 | -0.164 | 0.1   | 0.105 | 0.555 | -0.582 | -7.772 | 29.18 | -8.27  | 17.84 | 24.37 |
| 22_11 | 1.32423 | 1.86863 | -0.171 | 0.121 | 0.117 | 0.532 | -0.59  | -7.673 | 30.39 | -3.61  | 16.86 | 17.79 |
| 10_9  | 1.34148 | 1.86977 | -0.211 | 0.109 | 0.15  | 0.534 | -0.583 | -8.597 | 33.18 | -2.89  | 24.7  | 24.47 |
| 1_13  | 1.11502 | 1.67085 | 0.202  | 0.045 | 0.082 | 0.323 | -0.589 | -7.884 | 16.67 | -16.02 | 9.01  | 26.5  |
| 19_11 | 1.22244 | 1.86407 | -0.164 | 0.102 | 0.11  | 0.553 | -0.568 | -7.803 | 29.28 | -8.04  | 21.52 | 22.54 |
| 9_17  | 1.26993 | 1.84511 | -0.073 | 0.093 | 0.148 | 0.45  | -0.548 | -7.601 | 27.67 | -6.88  | 14.18 | 23.06 |
| 12_12 | 1.25975 | 1.82665 | 0.203  | 0.039 | 0.046 | 0.775 | -0.64  | -7.684 | 15.04 | -3.16  | 10.34 | 10.75 |
| 16_13 | 1.03868 | 1.79884 | 0.225  | 0.04  | 0.075 | 0.5   | -0.589 | -7.876 | 16.71 | -11.15 | 7.68  | 24.3  |
| 16_3  | 1.22519 | 1.87101 | -0.083 | 0.076 | 0.035 | 0.538 | -0.611 | -7.643 | 32.2  | -13.76 | 17.6  | 33.03 |
| 7_7   | 1.3446  | 1.86325 | -0.239 | 0.094 | 0.162 | 0.448 | -0.538 | -9.185 | 43.58 | 6.87   | 47.85 | 32.64 |
| 3_12  | 1.23533 | 1.87071 | 0.232  | 0.033 | 0.036 | 0.523 | -0.597 | -7.636 | 17.07 | -13.73 | 4.59  | 25.51 |
| 14_11 | 1.33697 | 1.81014 | -0.191 | 0.109 | 0.118 | 0.831 | -0.609 | -7.861 | 27.95 | -1.7   | 24.02 | 13.25 |
| 4_20  | 1.30402 | 1.79461 | -0.147 | 0.096 | 0.108 | 0.908 | -0.597 | -7.043 | 28.27 | -1.03  | 17.33 | 15.18 |
| 16_14 | 0.9903  | 1.77477 | 0.224  | 0.04  | 0.077 | 0.5   | -0.589 | -7.839 | 16.56 | -8.14  | 5.49  | 21.2  |
| 16_11 | 1.27717 | 1.86391 | -0.164 | 0.101 | 0.104 | 0.555 | -0.582 | -7.755 | 29.31 | -8.27  | 17.82 | 24.14 |
| 21_19 | 1.20497 | 1.85911 | -0.104 | 0.09  | 0.096 | 0.544 | -0.59  | -7.581 | 30.63 | -9.5   | 14.2  | 25.42 |
| 17_13 | 1.03923 | 1.80884 | 0.226  | 0.039 | 0.076 | 0.5   | -0.589 | -7.893 | 16.55 | -10.72 | 7.31  | 23.58 |
| 20_8  | 1.25281 | 1.8423  | 0.011  | 0.088 | 0.174 | 0.537 | -0.551 | -7.956 | 32.76 | -3.63  | 31.99 | 22.21 |

|       |         |         |        |       |        |       |        |        |       |        |       |       |
|-------|---------|---------|--------|-------|--------|-------|--------|--------|-------|--------|-------|-------|
| 14_8  | 1.35125 | 1.79839 | -0.013 | 0.101 | 0.2    | 0.814 | -0.573 | -8.451 | 33.05 | 4.81   | 43.76 | 27.45 |
| 14_12 | 1.21109 | 1.80951 | 0.2    | 0.042 | 0.062  | 0.776 | -0.619 | -7.822 | 13.61 | -6.26  | 12.61 | 13.58 |
| 2_11  | 1.30995 | 1.87254 | -0.17  | 0.101 | 0.098  | 0.564 | -0.596 | -7.741 | 27.19 | -11.15 | 17.65 | 23.24 |
| 15_3  | 1.24477 | 1.85326 | -0.088 | 0.058 | -0.018 | 0.689 | -0.682 | -7.364 | 32.84 | -15.81 | 26.81 | 29.52 |
| 20_22 | 1.25417 | 1.84709 | -0.114 | 0.081 | 0.061  | 0.55  | -0.579 | -7.422 | 32.81 | -10.28 | 17.4  | 23.2  |
| 3_13  | 1.10028 | 1.74906 | 0.226  | 0.036 | 0.055  | 0.528 | -0.586 | -7.773 | 18.1  | -9.15  | 3.74  | 22.57 |
| 3_15  | 1.24251 | 1.88435 | 0.085  | 0.044 | 0.021  | 0.548 | -0.599 | -7.291 | 9.34  | -18.09 | -0.21 | 32.34 |
| 8_18  | 1.29493 | 1.78805 | -0.129 | 0.118 | 0.161  | 0.632 | -0.532 | -7.894 | 31.85 | 4.54   | 17.6  | 21.28 |
| 2_13  | 1.12328 | 1.7005  | 0.218  | 0.037 | 0.059  | 0.512 | -0.592 | -7.771 | 16.9  | -13.67 | 8.85  | 24.15 |
| 6_4   | 1.29048 | 1.76403 | 0.316  | 0.023 | 0.142  | 0.409 | -0.518 | -8.539 | 20.26 | 0.6    | 26.22 | 11.3  |
| 20_1  | 1.2473  | 1.85182 | -0.329 | 0.075 | 0.041  | 0.521 | -0.608 | -7.723 | 35.53 | -12.58 | 24.95 | 22.72 |
| 19_13 | 1.0067  | 1.80189 | 0.225  | 0.042 | 0.082  | 0.497 | -0.575 | -7.899 | 18.15 | -9.44  | 6.32  | 24.36 |
| 1_12  | 1.21186 | 1.57961 | 0.208  | 0.041 | 0.064  | 0.318 | -0.601 | -7.766 | 15.15 | -17.25 | 5.79  | 26.35 |
| 19_3  | 1.18296 | 1.86738 | -0.08  | 0.081 | 0.047  | 0.534 | -0.609 | -7.68  | 31.97 | -13.12 | 16.73 | 29.46 |
| 16_4  | 1.21851 | 1.86897 | 0.348  | 0.004 | 0.074  | 0.479 | -0.582 | -8.033 | 19.6  | -8.44  | 23.8  | 20.1  |
| 4_5   | 1.37918 | 1.79384 | -0.206 | 0.064 | 0.134  | 0.886 | -0.578 | -8.363 | 28.04 | 1.59   | 33.44 | 13.17 |
| 19_19 | 1.28741 | 1.86612 | -0.106 | 0.09  | 0.087  | 0.545 | -0.582 | -7.47  | 30.25 | -10.06 | 16.89 | 26.38 |
| 7_12  | 1.25212 | 1.85752 | 0.218  | 0.04  | 0.112  | 0.394 | -0.56  | -8.152 | 15.45 | -3.71  | 0.69  | 16.7  |
| 7_17  | 1.28044 | 1.86232 | -0.1   | 0.086 | 0.131  | 0.444 | -0.561 | -7.527 | 28.15 | -1.3   | 7.6   | 17.39 |
| 17_18 | 1.27117 | 1.84861 | -0.093 | 0.088 | 0.088  | 0.549 | -0.596 | -7.381 | 32.88 | -9.57  | 17.67 | 24.03 |
| 14_6  | 1.37578 | 1.8187  | -0.249 | 0.06  | 0.1    | 0.801 | -0.606 | -8.013 | 26.98 | -1.06  | 28.81 | 11.05 |
| 19_7  | 1.26381 | 1.85662 | -0.222 | 0.094 | 0.125  | 0.543 | -0.581 | -8.672 | 38.93 | -4.54  | 30.73 | 30.84 |
| 17_19 | 1.21738 | 1.86062 | -0.104 | 0.089 | 0.083  | 0.548 | -0.6   | -7.486 | 30.56 | -10.42 | 16.3  | 25.19 |
| 22_7  | 1.34788 | 1.86215 | -0.23  | 0.11  | 0.125  | 0.525 | -0.59  | -8.586 | 38.45 | -0.25  | 31.09 | 25.68 |
| 11_18 | 1.27392 | 1.82915 | -0.079 | 0.096 | 0.115  | 0.486 | -0.573 | -7.497 | 32.07 | -10.49 | 18.48 | 24.43 |
| 6_19  | 1.3103  | 1.75837 | -0.128 | 0.104 | 0.156  | 0.496 | -0.534 | -7.661 | 27.91 | -3     | 14.87 | 21.27 |
| 21_10 | 1.23299 | 1.86347 | -0.123 | 0.091 | 0.089  | 0.542 | -0.591 | -7.516 | 35    | -8.96  | 17.72 | 24.4  |
| 1_19  | 1.2871  | 1.86228 | -0.118 | 0.095 | 0.098  | 0.371 | -0.598 | -7.37  | 29.11 | -17.31 | 15.56 | 30.58 |
| 5_18  | 1.30187 | 1.7575  | -0.123 | 0.103 | 0.144  | 0.538 | -0.541 | -7.687 | 31.23 | -2.23  | 18.85 | 17.6  |
| 3_19  | 1.25201 | 1.8681  | -0.107 | 0.086 | 0.061  | 0.573 | -0.598 | -7.43  | 31.65 | -4.73  | 8.21  | 20.59 |
| 18_1  | 1.21865 | 1.85311 | -0.33  | 0.078 | 0.055  | 0.521 | -0.598 | -8.102 | 37.06 | -11.29 | 27.59 | 23.14 |
| 15_8  | 1.29501 | 1.83883 | 0.009  | 0.078 | 0.152  | 0.676 | -0.634 | -8.574 | 29.01 | -7.85  | 28.8  | 30.54 |
| 21_9  | 1.29316 | 1.84705 | -0.216 | 0.112 | 0.16   | 0.563 | -0.559 | -8.746 | 34.47 | -2.15  | 26.17 | 28.46 |
| 8_22  | 1.30955 | 1.79091 | -0.147 | 0.117 | 0.158  | 0.636 | -0.5   | -7.931 | 31.94 | 3.57   | 18.18 | 16.32 |
| 7_2   | 1.27271 | 1.86272 | -0.11  | 0.081 | 0.09   | 0.429 | -0.572 | -8.083 | 32.58 | -2.17  | 15.63 | 15.39 |
| 19_5  | 1.24692 | 1.8641  | -0.137 | 0.05  | 0.1    | 0.519 | -0.567 | -8.018 | 28.97 | -8.26  | 25.74 | 19.96 |
| 10_5  | 1.33351 | 1.86944 | -0.128 | 0.048 | 0.091  | 0.49  | -0.593 | -7.962 | 27.24 | -7.22  | 21.2  | 18.34 |
| 20_18 | 1.26438 | 1.84284 | -0.093 | 0.087 | 0.078  | 0.549 | -0.601 | -7.293 | 33.33 | -10.49 | 18.13 | 23.88 |
| 13_22 | 1.30399 | 1.82052 | -0.139 | 0.096 | 0.096  | 0.825 | -0.595 | -7.516 | 29.4  | -4.26  | 25.65 | 13.8  |
| 3_18  | 1.27327 | 1.85208 | -0.092 | 0.088 | 0.072  | 0.575 | -0.599 | -7.346 | 31.11 | -7.84  | 10.64 | 20.84 |
| 17_12 | 1.19914 | 1.85714 | 0.232  | 0.035 | 0.059  | 0.496 | -0.6   | -7.733 | 14.77 | -13.38 | 5.92  | 25.18 |
| 1_18  | 1.27846 | 1.80795 | -0.113 | 0.095 | 0.095  | 0.369 | -0.597 | -7.421 | 32.51 | -14.1  | 16.82 | 26.92 |
| 19_1  | 1.2     | 1.88019 | -0.33  | 0.078 | 0.056  | 0.52  | -0.588 | -8.107 | 37.4  | -11.81 | 32.88 | 24.29 |
| 8_4   | 1.29615 | 1.75724 | 0.315  | 0.043 | 0.17   | 0.561 | -0.516 | -8.742 | 23.08 | 9.76   | 34    | 14.15 |

|       |         |         |        |       |       |       |        |        |       |        |       |       |
|-------|---------|---------|--------|-------|-------|-------|--------|--------|-------|--------|-------|-------|
| 10_20 | 1.26065 | 1.85709 | -0.078 | 0.083 | 0.071 | 0.514 | -0.616 | -6.862 | 27.49 | -12.32 | 10.91 | 23.57 |
| 12_16 | 1.29694 | 1.84053 | -0.118 | 0.094 | 0.077 | 0.825 | -0.643 | -7.204 | 32.01 | -1.57  | 21.23 | 12.32 |
| 7_15  | 1.29013 | 1.87137 | 0.061  | 0.059 | 0.102 | 0.421 | -0.564 | -8.06  | 7.45  | -4.17  | -0.64 | 19.13 |
| 4_7   | 1.37006 | 1.80261 | -0.284 | 0.106 | 0.155 | 0.91  | -0.579 | -9.177 | 43.08 | 4.08   | 55.72 | 29.29 |
| 12_7  | 1.36511 | 1.83185 | -0.257 | 0.098 | 0.123 | 0.82  | -0.624 | -8.724 | 32.77 | -0.58  | 42.89 | 19.38 |
| 4_2   | 1.2977  | 1.63202 | -0.156 | 0.087 | 0.071 | 0.894 | -0.603 | -8.04  | 33.27 | -2.8   | 30.09 | 13.85 |
| 9_2   | 1.27855 | 1.85552 | -0.099 | 0.11  | 0.119 | 0.43  | -0.573 | -8.163 | 28.25 | -7.83  | 23.25 | 21.6  |
| 9_9   | 1.35987 | 1.84638 | -0.211 | 0.136 | 0.216 | 0.473 | -0.523 | -9.117 | 36.72 | 2.27   | 39.53 | 31.27 |
| 13_1  | 1.25261 | 1.79253 | -0.626 | 0.086 | 0.062 | 0.798 | -0.36  | -8.102 | 38.63 | -5.41  | 34.04 | 15.98 |
| 8_15  | 1.32023 | 1.79866 | -0.537 | 0.093 | 0.127 | 0.611 | 0.036  | -8.378 | 7.26  | 0.7    | 0.6   | 15.82 |
| 4_9   | 1.37984 | 1.80452 | -0.567 | 0.124 | 0.191 | 0.925 | -0.27  | -9.04  | 35.62 | 5.34   | 43.76 | 28.68 |
| 12_1  | 1.32138 | 1.70549 | -0.647 | 0.083 | 0.046 | 0.797 | -0.359 | -8.06  | 38.31 | -4.25  | 43.75 | 12.39 |
| 14_1  | 1.25049 | 1.79308 | -0.626 | 0.087 | 0.064 | 0.798 | -0.36  | -8.084 | 38.79 | -5.72  | 35.1  | 16.51 |

**Table S4.** Total potential (E), and Gibbs free energies (G) of all structures optimized at the SMD/M06-2X/6-31G(d) level of theory along with the total potential energies calculated by SMD/M06-2X/def2-TZVP//SMD/M06-2X/6-31G(d) and Cartesian coordinates for all of the calculated structures, as well as eigenvalues of imaginary frequencies of transition states.

1

E (SMD/M06-2X/6-31G(d)) = -607.442888426

G (SMD/M06-2X/6-31G(d)) = -607.321304

E (SMD/M06-2X/def2-TZVP//SMD/M06-2X/6-31G(d)) = -607.683031508

|   |             |             |             |
|---|-------------|-------------|-------------|
| C | 1.62224000  | -0.54892200 | -0.00001300 |
| C | 0.49784100  | 0.38992300  | 0.00000700  |
| O | 1.52096400  | -1.75721500 | -0.00003800 |
| N | 0.84704100  | 1.65945900  | 0.00002200  |
| N | 1.13062900  | 2.74872800  | 0.00003000  |
| O | 2.80083700  | 0.09614300  | 0.00000600  |
| C | 3.95706100  | -0.74753000 | -0.00000800 |
| H | 4.81133600  | -0.07217500 | 0.00003700  |
| H | 3.96941200  | -1.37695400 | 0.89232500  |
| H | 3.96944600  | -1.37687700 | -0.89239500 |
| C | -0.94165200 | 0.07349300  | 0.00000300  |
| C | -1.89240700 | 1.10675000  | -0.00003300 |
| C | -3.25193900 | 0.81919600  | -0.00003500 |
| C | -3.69478900 | -0.50203600 | -0.00000300 |
| C | -2.75639100 | -1.53045200 | 0.00003400  |
| C | -1.39156500 | -1.25521800 | 0.00003700  |
| H | -1.57619600 | 2.14633900  | -0.00006100 |
| H | -3.96679700 | 1.63662300  | -0.00006400 |
| H | -4.75701100 | -0.72539600 | -0.00000600 |

H -3.08394200 -2.56593600 0.00006000  
H -0.67474400 -2.06559700 0.00006600

B(C<sub>6</sub>F<sub>5</sub>)<sub>3</sub>

E (SMD/M06-2X/6-31G(d)) = -2207.51326663

G (SMD/M06-2X/6-31G(d)) = -2207.414689

E (SMD/M06-2X/def2-TZVP//SMD/M06-2X/6-31G(d)) = -2208.4824978

B 0.00118300 0.00121600 0.00029800  
C -0.26993800 -1.54447700 0.00069700  
C -1.38155200 -2.10806800 0.63342100  
C 0.58197700 -2.45394300 -0.63242200  
C -1.63292300 -3.47010500 0.65181600  
C 0.35384700 -3.82011800 -0.64910900  
C -0.75963500 -4.33025800 0.00226100  
C -1.20232000 1.00790700 -0.00222600  
C -1.13922600 2.24949800 0.63650200  
C -2.41279100 0.72453600 -0.64083000  
C -2.19537500 3.14557800 0.65537300  
C -3.48393000 1.60256900 -0.65704400  
C -3.37371800 2.81928900 0.00006400  
C 1.47485200 0.54030300 0.00202000  
C 1.83577500 1.73129300 -0.63433300  
C 2.51846500 -0.13805300 0.63778800  
C 3.13337700 2.21572700 -0.65463400  
C 3.82407500 0.32435200 0.65271800  
C 4.13224300 1.50777000 -0.00237100  
F 1.67175900 -2.02683100 -1.27539200  
F 1.19094300 -4.64295800 -1.27725300  
F -0.98884700 -5.63578500 0.00371100  
F -2.70063400 -3.95733900 1.28031200  
F -2.26083100 -1.33371900 1.27439800  
F 2.28658100 -1.28347700 1.28411600  
F 4.78035700 -0.35456100 1.28284100  
F 5.37773300 1.96131300 -0.00492800  
F 3.42771000 3.34933500 -1.28758500  
F 0.91983600 2.46060700 -1.27678300  
F -0.03191600 2.62288500 1.28305300  
F -2.08934500 4.31097600 1.29016400  
F -4.39190600 3.66789100 0.00226200  
F -4.61231800 1.28960900 -1.29045800  
F -2.58191400 -0.43115500 -1.28842000

BCl<sub>3</sub>

E (SMD/M06-2X/6-31G(d)) = -1405.46167567

G (SMD/M06-2X/6-31G(d)) = -1405.483213

E (SMD/M06-2X/def2-TZVP//SMD/M06-2X/6-31G(d)) = -1405.57543303

B 0.00010300 -0.00011200 -0.00002500

|    |             |             |            |
|----|-------------|-------------|------------|
| Cl | -1.26595600 | -1.20083000 | 0.00000200 |
| Cl | -0.40721000 | 1.69654700  | 0.00000200 |
| Cl | 1.67313600  | -0.49568400 | 0.00000200 |

N<sub>2</sub>

E (SMD/M06-2X/6-31G(d)) = -109.482263966  
G (SMD/M06-2X/6-31G(d)) = -109.494897  
E (SMD/M06-2X/def2-TZVP//SMD/M06-2X/6-31G(d)) = -109.530284564  
N           0.00000000   0.00000000   0.54917600  
N           0.00000000   0.00000000  -0.54917600

**2**

E (SMD/M06-2X/6-31G(d)) = -2814.99425646  
G (SMD/M06-2X/6-31G(d)) = -2814.748128  
E (SMD/M06-2X/def2-TZVP//SMD/M06-2X/6-31G(d)) = -2816.19576608  
C           0.82216500  -0.92932800  -2.33017900  
C           2.20751000  -0.60752100  -2.26752600  
O           -0.09399400  -0.38193700  -1.66146200  
B           -0.41076500  -0.07033200  -0.15696600  
C           -1.70916600  -1.02065500   0.15376400  
C           -1.87647900  -1.85815900   1.25024900  
C           -2.80122500  -0.96392500  -0.71082900  
C           -3.02409800  -2.61372300   1.46385300  
C           -3.95957800  -1.70658100  -0.54110900  
C           -4.07138300  -2.54045900   0.56135400  
C           -0.93609900   1.46383600  -0.05460800  
C           -1.16387100   2.34499500  -1.10288700  
C           -1.35864400   1.91616500   1.19267800  
C           -1.71280600   3.61125200  -0.92600500  
C           -1.91165100   3.16521500   1.41561600  
C           -2.09149800   4.02337400   0.33944400  
C           0.90801500  -0.44631100   0.71558200  
C           1.41603200  -1.73815000   0.61269600  
C           1.64275200   0.40304500   1.53554100  
C           2.56151900  -2.17948900   1.25215700  
C           2.79425800   0.00235300   2.20393800  
C           3.25730800  -1.29389100   2.06282100  
F           -2.76687700  -0.15123500  -1.78165600  
F           -4.96642800  -1.61506500  -1.41257600  
F           -5.17614200  -3.25916500   0.75112500  
F           -3.12433400  -3.40610300   2.53313600  
F           -0.91930200  -1.98288300   2.18145500  
F           1.29877300   1.68591500   1.70801300  
F           3.47997500   0.87247100   2.94725700  
F           4.37129600  -1.68214700   2.68002500  
F           2.99919300  -3.43070000   1.09769500  
F           0.77876400  -2.63278400  -0.17273500

|   |             |             |             |
|---|-------------|-------------|-------------|
| F | -0.85152800 | 2.02194600  | -2.37003300 |
| F | -1.89369200 | 4.42160300  | -1.97157600 |
| F | -2.62413900 | 5.23023100  | 0.52411300  |
| F | -2.28185000 | 3.54584500  | 2.63994500  |
| F | -1.22194500 | 1.10818700  | 2.25751300  |
| O | 0.50687900  | -1.84214100 | -3.21795200 |
| C | -0.85045600 | -2.33793400 | -3.21114400 |
| C | 2.86906300  | 0.48486100  | -1.52428400 |
| C | 4.09252300  | 0.26343900  | -0.88582800 |
| C | 2.25238700  | 1.73722600  | -1.44452700 |
| C | 4.68107600  | 1.28644000  | -0.14766900 |
| H | 4.57455500  | -0.70939400 | -0.94805400 |
| C | 2.83531500  | 2.74528700  | -0.68446900 |
| H | 1.32122900  | 1.91293300  | -1.97231400 |
| C | 4.04607500  | 2.52172600  | -0.03001300 |
| H | 5.62596500  | 1.10781000  | 0.35674100  |
| H | 2.33971400  | 3.70811900  | -0.60510300 |
| H | 4.49665300  | 3.30945600  | 0.56556800  |
| H | -0.88622700 | -3.06002100 | -4.02383000 |
| H | -1.05332200 | -2.82226300 | -2.25398900 |
| H | -1.54553600 | -1.51708300 | -3.38499000 |
| N | 2.98076000  | -1.42674000 | -2.98311000 |
| N | 3.65460800  | -2.10452500 | -3.56130500 |

### 3

E (SMD/M06-2X/6-31G(d)) = -2705.47897604

G (SMD/M06-2X/6-31G(d)) = -2705.242907

E (SMD/M06-2X/def2-TZVP//SMD/M06-2X/6-31G(d)) = -2706.63800818

|   |             |             |             |
|---|-------------|-------------|-------------|
| C | -0.93890200 | 0.44035000  | 2.15542700  |
| C | -1.94260700 | 1.05668000  | 1.38921300  |
| O | 0.11897600  | -0.12065100 | 1.70967500  |
| B | 0.51944100  | -0.10265000 | 0.22543700  |
| C | 1.68482300  | -1.23612600 | 0.12277400  |
| C | 1.77064500  | -2.23281500 | -0.84028200 |
| C | 2.73900500  | -1.19931900 | 1.03142200  |
| C | 2.81129400  | -3.15195400 | -0.89341900 |
| C | 3.79466400  | -2.09895800 | 1.01729300  |
| C | 3.82904100  | -3.08585300 | 0.04395600  |
| C | 1.20204800  | 1.33431900  | -0.13081000 |
| C | 1.41243600  | 2.40024800  | 0.73101500  |
| C | 1.72888800  | 1.49751800  | -1.40811600 |
| C | 2.09332400  | 3.55512000  | 0.35843900  |
| C | 2.41071000  | 2.62714400  | -1.82471100 |
| C | 2.59799600  | 3.66814300  | -0.92493500 |
| C | -0.84449300 | -0.43130200 | -0.60807700 |
| C | -1.52194200 | -1.61423100 | -0.30326800 |
| C | -1.50962400 | 0.41545400  | -1.49408500 |

|   |             |             |             |
|---|-------------|-------------|-------------|
| C | -2.78995800 | -1.91521700 | -0.76233400 |
| C | -2.78011100 | 0.14617200  | -1.98820000 |
| C | -3.43430900 | -1.01022400 | -1.59922200 |
| F | 2.77655200  | -0.24684200 | 1.97855500  |
| F | 4.77613900  | -2.01911200 | 1.91901300  |
| F | 4.83370100  | -3.96001800 | 0.00854600  |
| F | 2.83920000  | -4.09477400 | -1.83824200 |
| F | 0.82727800  | -2.35614200 | -1.78652900 |
| F | -0.99106900 | 1.59203300  | -1.85977200 |
| F | -3.40796500 | 1.03072100  | -2.76379500 |
| F | -4.68100100 | -1.24135100 | -1.99233500 |
| F | -3.42634700 | -3.01754600 | -0.36730700 |
| F | -0.96758800 | -2.48707200 | 0.55055600  |
| F | 0.95236100  | 2.38234300  | 1.99670400  |
| F | 2.26419800  | 4.55191100  | 1.23026100  |
| F | 3.25257200  | 4.76720400  | -1.29760700 |
| F | 2.88634100  | 2.72821000  | -3.06769200 |
| F | 1.55042800  | 0.51666200  | -2.31032300 |
| O | -1.03980800 | 0.62185800  | 3.45222400  |
| C | 0.13607300  | 0.35388300  | 4.25190600  |
| C | -3.28510000 | 0.71111400  | 1.23535300  |
| C | -3.83983600 | -0.49926300 | 1.75002500  |
| C | -4.12195900 | 1.58114200  | 0.47794900  |
| C | -5.16783500 | -0.80775600 | 1.52898100  |
| H | -3.19852700 | -1.17752200 | 2.30827500  |
| C | -5.44632700 | 1.25891300  | 0.24991900  |
| H | -3.68289100 | 2.48891800  | 0.07398400  |
| C | -5.96201700 | 0.06841400  | 0.77658100  |
| H | -5.59156000 | -1.72717300 | 1.91783600  |
| H | -6.08158900 | 1.91493700  | -0.33480000 |
| H | -7.00204400 | -0.18575700 | 0.59340800  |
| H | -0.12816400 | 0.68915800  | 5.25263700  |
| H | 0.34810100  | -0.71609400 | 4.24603200  |
| H | 0.98734600  | 0.91150500  | 3.86321300  |

indole

E (SMD/M06-2X/6-31G(d)) = -363.677611641

G (SMD/M06-2X/6-31G(d)) = -363.576284

E (SMD/M06-2X/def2-TZVP//SMD/M06-2X/6-31G(d)) = -363.815667193

|   |             |             |             |
|---|-------------|-------------|-------------|
| C | -0.24975700 | 0.75153700  | 0.00017200  |
| C | -0.25020400 | -0.66737300 | 0.00004000  |
| C | 0.93231500  | -1.41772300 | 0.00027200  |
| C | 2.12879000  | -0.72106000 | 0.00000800  |
| C | 2.15506900  | 0.69011600  | -0.00037700 |
| C | 0.98381500  | 1.42771200  | 0.00003400  |
| C | -1.62492200 | 1.16662400  | 0.00026400  |



|   |             |             |             |
|---|-------------|-------------|-------------|
| C | -2.38173900 | 0.02663900  | -0.00007300 |
| H | 0.90661400  | -2.50345600 | 0.00088300  |
| H | 3.06541900  | -1.27053600 | 0.00062700  |
| H | 3.11307900  | 1.20141000  | -0.00067300 |
| H | 1.01292800  | 2.51399400  | -0.00008900 |
| H | -1.99935400 | 2.18072800  | 0.00069200  |
| H | -3.45567700 | -0.09716200 | -0.00014900 |
| N | -1.56105400 | -1.07537600 | -0.00045700 |
| H | -1.87582600 | -2.03617100 | -0.00012300 |

### TS<sup>i</sup>

E (SMD/M06-2X/6-31G(d)) = -3069.16520106

G (SMD/M06-2X/6-31G(d)) = -3068.805492

E (SMD/M06-2X/def2-TZVP//SMD/M06-2X/6-31G(d)) = -3070.45502707

|   |             |             |             |
|---|-------------|-------------|-------------|
| C | 1.31889200  | 0.21015000  | -1.07630300 |
| C | 1.66873200  | 1.10085200  | -0.05897100 |
| O | 0.15328200  | -0.32641400 | -1.17586700 |
| B | -0.97699600 | -0.23492600 | -0.14393300 |
| C | -2.15013600 | -1.19267900 | -0.76304100 |
| C | -3.50078800 | -0.88159900 | -0.86513800 |
| C | -1.81596400 | -2.48339000 | -1.16670200 |
| C | -4.45173700 | -1.76465200 | -1.36259200 |
| C | -2.73102800 | -3.39469100 | -1.67260900 |
| C | -4.06457700 | -3.02959200 | -1.77178400 |
| C | -1.38182900 | 1.34502700  | -0.04027500 |
| C | -1.18444900 | 2.18741700  | 1.04660700  |
| C | -1.84215600 | 1.98290700  | -1.19120100 |
| C | -1.40948100 | 3.55898700  | 1.00373700  |
| C | -2.08381900 | 3.34370300  | -1.28030700 |
| C | -1.85621500 | 4.14200700  | -0.16831000 |
| C | -0.52785100 | -0.93601600 | 1.26337100  |
| C | 0.60741600  | -1.70380800 | 1.48590400  |
| C | -1.42725500 | -0.90681100 | 2.32494900  |
| C | 0.86512300  | -2.35260600 | 2.68870500  |
| C | -1.21643200 | -1.54002400 | 3.53798800  |
| C | -0.05190100 | -2.27244900 | 3.72196200  |
| F | -0.54742300 | -2.91488000 | -1.05824200 |
| F | -2.34484700 | -4.61656800 | -2.04906200 |
| F | -4.96437100 | -3.88811200 | -2.24997700 |
| F | -5.73492500 | -1.40424100 | -1.44656700 |
| F | -3.96605800 | 0.31813500  | -0.48480700 |
| F | -2.57419500 | -0.21929700 | 2.18773300  |
| F | -2.11645800 | -1.46228200 | 4.52119500  |
| F | 0.17747300  | -2.89317800 | 4.87854900  |
| F | 1.98765100  | -3.06168500 | 2.84989200  |
| F | 1.54332500  | -1.86593000 | 0.53337200  |
| F | -0.66892600 | 1.73200000  | 2.19891000  |

|   |             |             |             |
|---|-------------|-------------|-------------|
| F | -1.15034300 | 4.32266500  | 2.06833800  |
| F | -2.02992100 | 5.45996300  | -0.23969900 |
| F | -2.50879800 | 3.89537600  | -2.41951600 |
| F | -2.06324200 | 1.26367400  | -2.30280300 |
| O | 2.25401800  | -0.22542400 | -1.88442200 |
| C | 2.02480700  | -1.48717400 | -2.54769900 |
| C | 1.68959900  | 2.50425400  | 0.00491300  |
| C | 1.93841000  | 3.12080700  | 1.25999500  |
| C | 1.40306200  | 3.32115700  | -1.12241100 |
| C | 1.89374700  | 4.49768600  | 1.38224700  |
| H | 2.14460700  | 2.48542100  | 2.11589900  |
| C | 1.35137100  | 4.69768100  | -0.98868600 |
| H | 1.21906100  | 2.84663800  | -2.08277100 |
| C | 1.59471300  | 5.28027300  | 0.26057200  |
| H | 2.07290000  | 4.97117400  | 2.34155800  |
| H | 1.11678100  | 5.32352300  | -1.84361500 |
| H | 1.54751500  | 6.36056800  | 0.36199500  |
| C | 4.58923800  | -0.99278600 | -0.16425800 |
| C | 5.19427300  | -0.70476200 | -1.41270400 |
| C | 5.67793200  | -1.70461800 | -2.26251900 |
| C | 5.53824400  | -3.01750100 | -1.83961300 |
| C | 4.93201800  | -3.32968200 | -0.60513600 |
| C | 4.45916600  | -2.33420900 | 0.23439000  |
| C | 4.21712200  | 0.26774400  | 0.41760400  |
| C | 4.60031000  | 1.24270800  | -0.48053100 |
| H | 6.14209900  | -1.45899000 | -3.21305800 |
| H | 5.90220900  | -3.82202400 | -2.47165300 |
| H | 4.83620100  | -4.37048200 | -0.31115200 |
| H | 3.97940100  | -2.58247400 | 1.17605600  |
| H | 3.80059400  | 0.43085700  | 1.40060000  |
| H | 4.51781300  | 2.31870100  | -0.41392400 |
| N | 5.18492800  | 0.66294800  | -1.56899200 |
| H | 5.52470100  | 1.16195500  | -2.38057500 |
| H | 1.19482600  | -1.39775300 | -3.25019300 |
| H | 2.95479500  | -1.69388900 | -3.07403400 |
| H | 1.81675400  | -2.26114100 | -1.80901500 |

benzofuran

E (SMD/M06-2X/6-31G(d)) = -383.524626529

G (SMD/M06-2X/6-31G(d)) = -383.435656

E (SMD/M06-2X/def2-TZVP//SMD/M06-2X/6-31G(d)) = -383.671127045

|   |             |             |             |
|---|-------------|-------------|-------------|
| C | 0.25935100  | 0.75421900  | 0.00012900  |
| C | 0.24939500  | -0.64818000 | 0.00022800  |
| C | -0.91019300 | -1.41401200 | 0.00004200  |
| C | -2.11013800 | -0.71338800 | 0.00009800  |
| C | -2.13593400 | 0.69336200  | -0.00004700 |
| C | -0.96452900 | 1.43796900  | -0.00031300 |

|   |             |             |             |
|---|-------------|-------------|-------------|
| C | 1.65656400  | 1.12560200  | 0.00013200  |
| C | 2.34528700  | -0.03646500 | 0.00014800  |
| H | -0.87128300 | -2.49811700 | 0.00021100  |
| H | -3.04610500 | -1.26320400 | 0.00005900  |
| H | -3.09407100 | 1.20384100  | -0.00016000 |
| H | -0.99379300 | 2.52337200  | 0.00019400  |
| H | 2.07664900  | 2.12118900  | 0.00016300  |
| H | 3.40320600  | -0.25684400 | -0.00033000 |
| O | 1.52332200  | -1.12811100 | -0.00033100 |

## TS<sup>ii</sup>

E (SMD/M06-2X/6-31G(d)) = -3089.01078985

G (SMD/M06-2X/6-31G(d)) = -3088.663417

E (SMD/M06-2X/def2-TZVP//SMD/M06-2X/6-31G(d)) = -3090.30861851

|   |             |             |             |
|---|-------------|-------------|-------------|
| C | 1.32625400  | 0.33635600  | -1.16394900 |
| C | 1.63798200  | 1.26034600  | -0.17051300 |
| O | 0.19455500  | -0.27705300 | -1.22216800 |
| B | -0.90727700 | -0.31317700 | -0.15945500 |
| C | -1.97760000 | -1.41079600 | -0.73559900 |
| C | -3.36021200 | -1.27072800 | -0.76801200 |
| C | -1.50750800 | -2.65195500 | -1.15898000 |
| C | -4.21828100 | -2.26526200 | -1.22203100 |
| C | -2.32699900 | -3.67012800 | -1.62375800 |
| C | -3.69854600 | -3.47284100 | -1.65670600 |
| C | -1.50603500 | 1.20409700  | -0.05076500 |
| C | -1.39120700 | 2.07185800  | 1.02792100  |
| C | -2.09086100 | 1.76496900  | -1.18434900 |
| C | -1.81556600 | 3.39534800  | 0.99539900  |
| C | -2.53032300 | 3.07666900  | -1.26329900 |
| C | -2.38433500 | 3.90299600  | -0.15904400 |
| C | -0.34657700 | -0.95051300 | 1.23834600  |
| C | 0.86214400  | -1.60670800 | 1.42991800  |
| C | -1.21560800 | -1.00271200 | 2.32448200  |
| C | 1.21510200  | -2.21737900 | 2.62887200  |
| C | -0.90992600 | -1.60172100 | 3.53455500  |
| C | 0.32570400  | -2.21466400 | 3.68883500  |
| F | -0.19232700 | -2.92601000 | -1.10951100 |
| F | -1.81215000 | -4.83601600 | -2.02304100 |
| F | -4.50748000 | -4.43679600 | -2.09492000 |
| F | -5.53877200 | -2.06636500 | -1.23990400 |
| F | -3.95234000 | -0.13969800 | -0.35510700 |
| F | -2.43077100 | -0.43914800 | 2.21341200  |
| F | -1.78475000 | -1.60464700 | 4.54296400  |
| F | 0.64743900  | -2.79934700 | 4.84224000  |
| F | 2.40458000  | -2.81438700 | 2.76223300  |
| F | 1.77886500  | -1.69191000 | 0.44866700  |
| F | -0.78092400 | 1.69667200  | 2.16341500  |

|   |             |             |             |
|---|-------------|-------------|-------------|
| F | -1.63488600 | 4.19286800  | 2.05167200  |
| F | -2.75345700 | 5.18092200  | -0.21991500 |
| F | -3.07099600 | 3.55529200  | -2.38665400 |
| F | -2.25090300 | 1.01583400  | -2.28700500 |
| O | 2.25771100  | -0.04484300 | -2.00763400 |
| C | 2.10328700  | -1.32810200 | -2.64917400 |
| C | 1.43410900  | 2.64924800  | -0.03918100 |
| C | 1.62230500  | 3.25326000  | 1.23005900  |
| C | 0.99225700  | 3.44789500  | -1.12667000 |
| C | 1.36468400  | 4.60137000  | 1.40663100  |
| H | 1.95177000  | 2.63196500  | 2.05737000  |
| C | 0.72558500  | 4.79319000  | -0.93843600 |
| H | 0.85972300  | 2.98311700  | -2.10019200 |
| C | 0.91200900  | 5.36512900  | 0.32522500  |
| H | 1.49697600  | 5.06294700  | 2.37928800  |
| H | 0.36965100  | 5.40195700  | -1.76340000 |
| H | 0.69886600  | 6.42037600  | 0.46912700  |
| C | 4.63425700  | -0.39195900 | -0.17279100 |
| C | 5.09070700  | -0.20903800 | -1.48390700 |
| C | 5.66590600  | -1.21179900 | -2.25202000 |
| C | 5.77086600  | -2.45924100 | -1.64654000 |
| C | 5.31477400  | -2.67957200 | -0.33416300 |
| C | 4.74428200  | -1.65898700 | 0.41438800  |
| C | 4.11523700  | 0.89415200  | 0.23529000  |
| C | 4.29666600  | 1.71732700  | -0.84193300 |
| H | 6.00801700  | -1.02584700 | -3.26444700 |
| H | 6.21344000  | -3.28143600 | -2.20006000 |
| H | 5.40936800  | -3.67072500 | 0.09797400  |
| H | 4.37605400  | -1.84012100 | 1.41853100  |
| H | 3.78478900  | 1.18368900  | 1.22104300  |
| H | 4.09666400  | 2.76886700  | -0.99265700 |
| H | 1.16182100  | -1.37046700 | -3.19674300 |
| H | 2.94707000  | -1.39592600 | -3.33329400 |
| H | 2.14757200  | -2.11965000 | -1.90007700 |
| O | 4.88239000  | 1.08078500  | -1.88278800 |

indene

E (SMD/M06-2X/6-31G(d)) = -347.618649971

G (SMD/M06-2X/6-31G(d)) = -347.506941

E (SMD/M06-2X/def2-TZVP//SMD/M06-2X/6-31G(d)) = -347.746252541

|   |             |             |             |
|---|-------------|-------------|-------------|
| C | 0.21122400  | 0.72037100  | -0.00014800 |
| C | 0.22996000  | -0.68741300 | -0.00028800 |
| C | -0.95535200 | -1.40875200 | -0.00017400 |
| C | -2.16755900 | -0.71212700 | 0.00004000  |
| C | -2.18650700 | 0.68450300  | 0.00012300  |
| C | -0.99722400 | 1.41440700  | 0.00005400  |
| C | 1.60151700  | 1.19582900  | -0.00012900 |

|   |             |             |             |
|---|-------------|-------------|-------------|
| C | 2.43387400  | 0.14129600  | 0.00001900  |
| H | -0.94625200 | -2.49578700 | -0.00014300 |
| H | -3.10390100 | -1.26229200 | 0.00007100  |
| H | -3.13828700 | 1.20780100  | 0.00027800  |
| H | -1.01496300 | 2.50092900  | 0.00013900  |
| H | 1.88702300  | 2.24241000  | -0.00003400 |
| H | 3.51733900  | 0.18455400  | 0.00014200  |
| C | 1.66368400  | -1.15475500 | 0.00016400  |
| H | 1.89921100  | -1.76952100 | -0.87841800 |
| H | 1.89812100  | -1.76824500 | 0.87999600  |

**TS<sup>iii</sup>**

E (SMD/M06-2X/6-31G(d)) = -3053.10501529

G (SMD/M06-2X/6-31G(d)) = -3052.734262

E (SMD/M06-2X/def2-TZVP//SMD/M06-2X/6-31G(d)) = -3054.38389012

|   |             |             |             |
|---|-------------|-------------|-------------|
| C | 1.31946900  | 0.41850300  | -1.16747200 |
| C | 1.57897600  | 1.36084700  | -0.18142900 |
| O | 0.22594700  | -0.26384000 | -1.21732000 |
| B | -0.88278700 | -0.34680800 | -0.16672500 |
| C | -1.88668600 | -1.50616400 | -0.74342900 |
| C | -3.27417800 | -1.44023200 | -0.79611300 |
| C | -1.34559700 | -2.72582900 | -1.14386600 |
| C | -4.07215400 | -2.48577100 | -1.24555800 |
| C | -2.10361800 | -3.79286700 | -1.60317200 |
| C | -3.48321000 | -3.66993800 | -1.65543900 |
| C | -1.56698200 | 1.13566700  | -0.08159900 |
| C | -1.53750900 | 2.01131900  | 0.99658100  |
| C | -2.15149200 | 1.65621300  | -1.23426000 |
| C | -2.04346700 | 3.30517700  | 0.94618400  |
| C | -2.66937100 | 2.93771200  | -1.33159700 |
| C | -2.60880200 | 3.77344200  | -0.22653500 |
| C | -0.30903400 | -0.94035600 | 1.24516800  |
| C | 0.93183800  | -1.52607400 | 1.45841100  |
| C | -1.19100700 | -1.03940100 | 2.31773000  |
| C | 1.30011600  | -2.11089000 | 2.66578400  |
| C | -0.87036600 | -1.61443700 | 3.53557300  |
| C | 0.39584700  | -2.15476600 | 3.71201600  |
| F | -0.01854500 | -2.92863500 | -1.07487600 |
| F | -1.52214700 | -4.93505600 | -1.97897300 |
| F | -4.23363100 | -4.68242600 | -2.08849200 |
| F | -5.40110500 | -2.35834300 | -1.28210300 |
| F | -3.93150700 | -0.33695200 | -0.40686700 |
| F | -2.43629700 | -0.55122700 | 2.18483900  |
| F | -1.75972800 | -1.66396100 | 4.53001900  |
| F | 0.73274500  | -2.71557300 | 4.87294400  |
| F | 2.51838600  | -2.64123700 | 2.81981700  |
| F | 1.86530300  | -1.56612400 | 0.49085800  |

|   |             |             |             |
|---|-------------|-------------|-------------|
| F | -0.93979900 | 1.67714400  | 2.15130100  |
| F | -1.94266400 | 4.11625600  | 2.00278100  |
| F | -3.05478000 | 5.02585300  | -0.30361800 |
| F | -3.20524600 | 3.37949500  | -2.47224000 |
| F | -2.23263000 | 0.89486700  | -2.33730500 |
| O | 2.26588400  | 0.08807700  | -2.01735900 |
| C | 2.19630100  | -1.21701800 | -2.62746800 |
| C | 1.28433200  | 2.72673900  | -0.01408100 |
| C | 1.42957200  | 3.30698400  | 1.27160600  |
| C | 0.80379600  | 3.52506500  | -1.08526900 |
| C | 1.09308200  | 4.63307100  | 1.47967200  |
| H | 1.78837500  | 2.68386900  | 2.08504800  |
| C | 0.46247400  | 4.84832700  | -0.86643500 |
| H | 0.70414000  | 3.07659800  | -2.07028800 |
| C | 0.60722300  | 5.39734400  | 0.41305300  |
| H | 1.19129100  | 5.07663300  | 2.46464000  |
| H | 0.07900900  | 5.45733100  | -1.67882200 |
| H | 0.33407300  | 6.43502300  | 0.58118800  |
| C | 4.68940100  | -0.22029900 | -0.20564500 |
| C | 5.17927500  | -0.01621100 | -1.50893300 |
| C | 5.78495700  | -1.05352700 | -2.20414600 |
| C | 5.89569000  | -2.30095600 | -1.58358000 |
| C | 5.40601500  | -2.50391100 | -0.29010400 |
| C | 4.79692200  | -1.46509800 | 0.41258700  |
| C | 4.10763700  | 1.03967600  | 0.26810700  |
| C | 4.21156900  | 1.97296500  | -0.71398300 |
| H | 6.16572100  | -0.90365300 | -3.21113200 |
| H | 6.36795900  | -3.12362400 | -2.11239100 |
| H | 5.49908200  | -3.48268300 | 0.17085000  |
| H | 4.39951200  | -1.62765900 | 1.40949900  |
| H | 3.74150200  | 1.19954200  | 1.27531700  |
| H | 3.91791000  | 3.01293800  | -0.63507700 |
| H | 1.26944600  | -1.32645100 | -3.19097500 |
| H | 3.05691400  | -1.25369400 | -3.29323400 |
| H | 2.27091500  | -1.98639600 | -1.85786400 |
| C | 4.90945500  | 1.40800700  | -1.92032000 |
| H | 4.29158300  | 1.47148500  | -2.82421100 |
| H | 5.83381800  | 1.96427000  | -2.12648900 |

styrene

E (SMD/M06-2X/6-31G(d)) = -309.511613917

G (SMD/M06-2X/6-31G(d)) = -309.407898

E (SMD/M06-2X/def2-TZVP//SMD/M06-2X/6-31G(d)) = -309.628707908

|   |             |             |             |
|---|-------------|-------------|-------------|
| C | 0.51143800  | -0.22428100 | -0.02164200 |
| C | 0.01557900  | 1.08809900  | -0.03075200 |
| C | -1.35308600 | 1.32907100  | -0.00999000 |
| C | -2.25680200 | 0.26545300  | 0.01783200  |

|   |             |             |             |
|---|-------------|-------------|-------------|
| C | -1.77841000 | -1.04225100 | 0.02232400  |
| C | -0.40671400 | -1.28186600 | 0.00101500  |
| C | 1.95403300  | -0.53531600 | -0.03608100 |
| C | 2.95856500  | 0.33919100  | 0.04830800  |
| H | -1.71854400 | 2.35177800  | -0.01866100 |
| H | -3.32538700 | 0.45770300  | 0.03279500  |
| H | -2.47214500 | -1.87763000 | 0.04137500  |
| H | -0.03557100 | -2.30391200 | 0.00432900  |
| H | 2.19000500  | -1.59593800 | -0.11724300 |
| H | 3.99010300  | 0.00154300  | 0.02856500  |
| H | 2.79974200  | 1.41018200  | 0.14304300  |
| H | 0.70418000  | 1.92768000  | -0.06029200 |

### TS<sup>iv</sup>

E (SMD/M06-2X/6-31G(d)) = -3014.99754852

G (SMD/M06-2X/6-31G(d)) = -3014.634741

E (SMD/M06-2X/def2-TZVP//SMD/M06-2X/6-31G(d)) = -3016.26605428

|   |             |             |             |
|---|-------------|-------------|-------------|
| C | 0.95313500  | 0.94988400  | -1.43417700 |
| C | 0.91198600  | 1.97645600  | -0.49065900 |
| O | 0.24964500  | -0.12283400 | -1.32307900 |
| B | -0.60722600 | -0.59805100 | -0.14320600 |
| C | -1.09488700 | -2.09890700 | -0.58604400 |
| C | -2.37964900 | -2.61432600 | -0.45643200 |
| C | -0.14954000 | -3.00698500 | -1.05762800 |
| C | -2.72022400 | -3.91574300 | -0.80588500 |
| C | -0.44639700 | -4.31170700 | -1.42351600 |
| C | -1.74810200 | -4.77045100 | -1.29723100 |
| C | -1.83601500 | 0.46968900  | 0.01152900  |
| C | -2.05626000 | 1.34737000  | 1.06594300  |
| C | -2.71899700 | 0.61606600  | -1.05620200 |
| C | -3.07201600 | 2.29640000  | 1.07339100  |
| C | -3.74543500 | 1.54617200  | -1.09384200 |
| C | -3.92000900 | 2.39962000  | -0.01493000 |
| C | 0.31671100  | -0.81604000 | 1.18601200  |
| C | 1.70485600  | -0.84485300 | 1.22730700  |
| C | -0.31023200 | -1.17776900 | 2.37502000  |
| C | 2.42516400  | -1.13488300 | 2.38160000  |
| C | 0.36467900  | -1.48034000 | 3.54527600  |
| C | 1.75233100  | -1.45275100 | 3.54822800  |
| F | 1.14077900  | -2.64451600 | -1.15801600 |
| F | 0.50710800  | -5.12941500 | -1.87730900 |
| F | -2.05836900 | -6.02063600 | -1.63803900 |
| F | -3.97630300 | -4.34833300 | -0.66956300 |
| F | -3.38388300 | -1.86308600 | 0.02093600  |
| F | -1.65224300 | -1.24324500 | 2.41193000  |
| F | -0.29711300 | -1.80567400 | 4.65831500  |
| F | 2.42840000  | -1.73791700 | 4.66065700  |

|   |             |             |             |
|---|-------------|-------------|-------------|
| F | 3.76202300  | -1.11759700 | 2.37166100  |
| F | 2.44221300  | -0.59415900 | 0.13285300  |
| F | -1.23833300 | 1.37946400  | 2.13000600  |
| F | -3.20506400 | 3.14125800  | 2.09934900  |
| F | -4.86808500 | 3.33421000  | -0.04100200 |
| F | -4.55054900 | 1.64010700  | -2.15510200 |
| F | -2.59669000 | -0.17870000 | -2.13146700 |
| O | 1.83683400  | 0.98331500  | -2.40548500 |
| C | 2.16317700  | -0.26852100 | -3.04580500 |
| C | 0.07003700  | 3.08883900  | -0.31837600 |
| C | 0.10181300  | 3.77478500  | 0.92309400  |
| C | -0.83014300 | 3.52238700  | -1.32868100 |
| C | -0.74555100 | 4.84463500  | 1.15066800  |
| H | 0.79101300  | 3.42819600  | 1.68681900  |
| C | -1.67372500 | 4.59279900  | -1.09283400 |
| H | -0.84432000 | 2.99798900  | -2.28064800 |
| C | -1.63055100 | 5.24758000  | 0.14464400  |
| H | -0.73390100 | 5.36339900  | 2.10305200  |
| H | -2.37197100 | 4.92056700  | -1.85615400 |
| H | -2.30050800 | 6.08270900  | 0.32760900  |
| C | 4.41235700  | 1.78974800  | -0.83223300 |
| C | 4.88805000  | 1.44814400  | -2.10763500 |
| C | 5.74607700  | 0.36824200  | -2.27543400 |
| C | 6.14758500  | -0.38807600 | -1.17215400 |
| C | 5.68781600  | -0.05461600 | 0.09919700  |
| C | 4.82989600  | 1.02900500  | 0.26612500  |
| C | 3.49989100  | 2.92111400  | -0.60875900 |
| C | 2.84380400  | 3.61376100  | -1.55724500 |
| H | 6.10831300  | 0.11683600  | -3.26803800 |
| H | 6.81949700  | -1.23061500 | -1.30571900 |
| H | 5.99129400  | -0.64049300 | 0.96107100  |
| H | 4.46046700  | 1.28101800  | 1.25722200  |
| H | 3.37628100  | 3.21749000  | 0.43221500  |
| H | 2.23804500  | 4.47369200  | -1.29168800 |
| H | 1.27600400  | -0.69819600 | -3.51228500 |
| H | 2.90260800  | -0.00659200 | -3.80025600 |
| H | 2.58331100  | -0.95892800 | -2.31418700 |
| H | 2.91988600  | 3.37563500  | -2.61377900 |
| H | 4.59346700  | 2.03748700  | -2.97156200 |

#### TS<sub>3-4</sub>

E (SMD/M06-2X/6-31G(d)) = -2705.44055559

G (SMD/M06-2X/6-31G(d)) = -2705.205541

E (SMD/M06-2X/def2-TZVP//SMD/M06-2X/6-31G(d)) = -2706.60131696

|   |             |            |            |
|---|-------------|------------|------------|
| C | -1.00129500 | 0.36569400 | 2.02635900 |
| C | -2.27355400 | 0.49641500 | 1.95058700 |
| O | 0.18323600  | 0.03150200 | 1.82195300 |



|   |             |             |             |
|---|-------------|-------------|-------------|
| B | 0.62409200  | -0.13008500 | 0.29610500  |
| C | 1.83291000  | -1.21280400 | 0.32801800  |
| C | 1.98699000  | -2.28208800 | -0.54626900 |
| C | 2.87930000  | -1.03080800 | 1.22847600  |
| C | 3.08188600  | -3.13681800 | -0.51474100 |
| C | 3.98694900  | -1.86244300 | 1.29679000  |
| C | 4.08705400  | -2.92756400 | 0.41497800  |
| C | 1.25571300  | 1.28457300  | -0.19735600 |
| C | 1.62990300  | 2.35391600  | 0.60580600  |
| C | 1.59870300  | 1.40886100  | -1.54090700 |
| C | 2.26761400  | 3.48700900  | 0.10835300  |
| C | 2.23304100  | 2.51518400  | -2.07779700 |
| C | 2.57241600  | 3.56811300  | -1.23867000 |
| C | -0.73758800 | -0.60727000 | -0.47240300 |
| C | -1.29434300 | -1.84885000 | -0.16278600 |
| C | -1.52987000 | 0.19019700  | -1.29147500 |
| C | -2.52671900 | -2.28319000 | -0.62540000 |
| C | -2.76515000 | -0.21039900 | -1.78983400 |
| C | -3.27331300 | -1.45036700 | -1.44661000 |
| F | 2.85247000  | 0.00773700  | 2.07809600  |
| F | 4.95641600  | -1.64081800 | 2.18693700  |
| F | 5.14274000  | -3.73813000 | 0.45794500  |
| F | 3.17382300  | -4.15450800 | -1.37360000 |
| F | 1.06555500  | -2.54523200 | -1.48411500 |
| F | -1.16698200 | 1.44373800  | -1.60471200 |
| F | -3.49207000 | 0.62317200  | -2.53621600 |
| F | -4.47318600 | -1.83087600 | -1.87737300 |
| F | -3.01241800 | -3.47260300 | -0.26766600 |
| F | -0.63475900 | -2.68286800 | 0.65571500  |
| F | 1.38986900  | 2.35890900  | 1.92769100  |
| F | 2.59472600  | 4.49109500  | 0.92541900  |
| F | 3.18485800  | 4.64501400  | -1.72754400 |
| F | 2.52395100  | 2.57998700  | -3.37835000 |
| F | 1.29111000  | 0.40811400  | -2.38324000 |
| O | -1.56029400 | 1.37408800  | 3.06632600  |
| C | -1.41803200 | 2.78545800  | 2.72905500  |
| C | -3.62489100 | 0.45896700  | 1.45716200  |
| C | -4.44106400 | -0.63885100 | 1.76230500  |
| C | -4.05973000 | 1.44755200  | 0.56114100  |
| C | -5.68834400 | -0.74978000 | 1.15843800  |
| H | -4.08060300 | -1.40131600 | 2.44573400  |
| C | -5.31570700 | 1.33628400  | -0.02205000 |
| H | -3.39758600 | 2.27043600  | 0.30502900  |
| C | -6.12204300 | 0.23527300  | 0.27073500  |
| H | -6.31931000 | -1.60543100 | 1.37518200  |
| H | -5.65554900 | 2.09135100  | -0.72306700 |
| H | -7.09399600 | 0.14035400  | -0.20367900 |

|   |             |            |            |
|---|-------------|------------|------------|
| H | -2.37612200 | 3.25606400 | 2.95181900 |
| H | -0.62766600 | 3.17719400 | 3.36776500 |
| H | -1.16312500 | 2.88887000 | 1.67211700 |

**4**

E (SMD/M06-2X/6-31G(d)) = -497.958646465

G (SMD/M06-2X/6-31G(d)) = -497.845344

E (SMD/M06-2X/def2-TZVP//SMD/M06-2X/6-31G(d)) = -498.156618097

|   |             |             |             |
|---|-------------|-------------|-------------|
| C | 1.91682000  | 1.13923300  | -0.18762600 |
| C | 1.16155200  | 0.04420600  | -0.23258600 |
| O | 2.58525100  | 2.09455600  | -0.17275100 |
| O | 1.82296900  | -1.15039800 | -0.43964200 |
| C | 2.04076200  | -1.87765900 | 0.77103400  |
| C | -0.30230800 | 0.07608100  | -0.11020800 |
| C | -0.99288700 | 1.22760900  | 0.29396300  |
| C | -1.02678900 | -1.08312800 | -0.41290500 |
| C | -2.37978500 | 1.21949700  | 0.37779400  |
| H | -0.44269200 | 2.13111000  | 0.54847500  |
| C | -2.41585000 | -1.08664400 | -0.31348600 |
| H | -0.49510700 | -1.97437800 | -0.73203600 |
| C | -3.09950000 | 0.06193100  | 0.07804200  |
| H | -2.90127000 | 2.11992500  | 0.68870700  |
| H | -2.96495400 | -1.99345900 | -0.54986400 |
| H | -4.18245300 | 0.05689100  | 0.15206100  |
| H | 2.47887700  | -2.83456400 | 0.48154300  |
| H | 2.73248100  | -1.33595300 | 1.42536500  |
| H | 1.09726000  | -2.04959300 | 1.30077100  |

**TS<sub>3-5</sub>**

E (SMD/M06-2X/6-31G(d)) = -2705.43734864

G (SMD/M06-2X/6-31G(d)) = -2705.202124

E (SMD/M06-2X/def2-TZVP//SMD/M06-2X/6-31G(d)) = -2706.59652496

|   |             |             |             |
|---|-------------|-------------|-------------|
| C | 1.31804600  | -2.07097800 | 1.63686700  |
| C | 1.60618800  | -0.66382100 | 1.87797500  |
| O | 1.07663000  | -2.52852900 | 0.53142100  |
| B | -0.73869200 | 0.33402200  | -0.34698600 |
| C | -1.56801700 | -1.01917000 | -0.38371900 |
| C | -2.15448800 | -1.33924600 | -1.60176800 |
| C | -1.80637200 | -1.90392700 | 0.65733100  |
| C | -2.92566300 | -2.47083600 | -1.80412200 |
| C | -2.56710300 | -3.05375900 | 0.49267200  |
| C | -3.12986700 | -3.33896800 | -0.74087400 |
| C | 0.71290500  | 0.40613400  | -0.91474600 |
| C | 1.56868700  | 1.48398800  | -0.64308600 |
| C | 1.28453800  | -0.62818100 | -1.67063900 |
| C | 2.87950700  | 1.54580000  | -1.08014300 |
| C | 2.60489800  | -0.61364300 | -2.09222500 |

|   |             |             |             |
|---|-------------|-------------|-------------|
| C | 3.40713500  | 0.47671700  | -1.79047800 |
| C | -1.52849000 | 1.62339700  | 0.07601300  |
| C | -2.44612200 | 1.62816900  | 1.12726300  |
| C | -1.45572200 | 2.80446100  | -0.66705800 |
| C | -3.21931400 | 2.73289600  | 1.44964800  |
| C | -2.22673700 | 3.91991900  | -0.38634300 |
| C | -3.10920900 | 3.88387900  | 0.68427500  |
| F | -1.29763300 | -1.69326600 | 1.87554000  |
| F | -2.74962900 | -3.89041500 | 1.51668000  |
| F | -3.86209500 | -4.43692200 | -0.90552900 |
| F | -3.46210100 | -2.73335000 | -2.99547200 |
| F | -1.94664300 | -0.52141300 | -2.64697600 |
| F | -0.63830600 | 2.89033300  | -1.72034800 |
| F | -2.13112900 | 5.01994000  | -1.13044500 |
| F | -3.84801100 | 4.94725600  | 0.97121800  |
| F | -4.06520900 | 2.69529700  | 2.47714300  |
| F | -2.59924800 | 0.54477000  | 1.89063900  |
| F | 1.16648700  | 2.49637500  | 0.12734000  |
| F | 3.64923600  | 2.59230200  | -0.78659500 |
| F | 4.67438700  | 0.49755600  | -2.17465800 |
| F | 3.10485900  | -1.62983200 | -2.79269900 |
| F | 0.56892400  | -1.68222400 | -2.04496400 |
| O | 1.23243300  | -2.77045500 | 2.77414300  |
| C | 0.73644100  | -4.10740800 | 2.63400600  |
| C | 2.95069500  | -0.23577300 | 1.71069600  |
| C | 3.26102500  | 1.10519200  | 2.05655900  |
| C | 3.97452000  | -1.05024200 | 1.15580900  |
| C | 4.53933100  | 1.60481000  | 1.87738600  |
| H | 2.46572400  | 1.72293500  | 2.46304200  |
| C | 5.23980000  | -0.53292700 | 0.93446000  |
| H | 3.74429100  | -2.07422400 | 0.87224800  |
| C | 5.51831400  | 0.78836700  | 1.30198600  |
| H | 4.77599100  | 2.62787900  | 2.14953600  |
| H | 6.01474600  | -1.14603800 | 0.48627800  |
| H | 6.51444900  | 1.18790500  | 1.13413200  |
| H | 0.75853500  | -4.53397200 | 3.63591400  |
| H | -0.28774400 | -4.09161200 | 2.25417300  |
| H | 1.37038500  | -4.68787800 | 1.96076700  |

## 5

E (SMD/M06-2X/6-31G(d)) = -2705.506052

G (SMD/M06-2X/6-31G(d)) = -2705.267876

E (SMD/M06-2X/def2-TZVP//SMD/M06-2X/6-31G(d)) = -2706.661422

|   |             |             |            |
|---|-------------|-------------|------------|
| C | 1.30095900  | 0.72950000  | 2.27602100 |
| O | 0.67159400  | 1.53162600  | 2.91651300 |
| C | 0.66901000  | -0.42037900 | 1.51442500 |
| B | -0.06106800 | -0.00812300 | 0.12129700 |

|   |             |             |             |
|---|-------------|-------------|-------------|
| C | -0.82679200 | 1.43283200  | 0.22054900  |
| C | -0.80214800 | 2.42408900  | -0.75321600 |
| C | -1.71377500 | 1.65975100  | 1.26830300  |
| C | -1.56651200 | 3.58199600  | -0.67867000 |
| C | -2.49298000 | 2.80002100  | 1.38356800  |
| C | -2.41536400 | 3.77325900  | 0.39872200  |
| C | -1.19997300 | -1.01259100 | -0.47866300 |
| C | -1.47523900 | -1.01682000 | -1.84406900 |
| C | -2.08998700 | -1.75094500 | 0.29454800  |
| C | -2.52652200 | -1.71587900 | -2.41654200 |
| C | -3.15534400 | -2.46797000 | -0.23667000 |
| C | -3.37761200 | -2.44855600 | -1.60305600 |
| C | 1.36177200  | 0.03909700  | -0.73088100 |
| C | 1.82933000  | -1.02074700 | -1.50790100 |
| C | 2.21745300  | 1.14000900  | -0.68157200 |
| C | 3.02929300  | -0.98952200 | -2.20334200 |
| C | 3.42735900  | 1.20978600  | -1.35214300 |
| C | 3.83769700  | 0.13331700  | -2.12282000 |
| F | -1.85452200 | 0.72955900  | 2.22466900  |
| F | -3.31897900 | 2.96511200  | 2.41946000  |
| F | -3.15660500 | 4.87700700  | 0.48438600  |
| F | -1.49253500 | 4.50705800  | -1.63897800 |
| F | -0.02084500 | 2.30494400  | -1.83720900 |
| F | 1.88943900  | 2.21552400  | 0.05168600  |
| F | 4.19617500  | 2.29470600  | -1.25644300 |
| F | 4.99428300  | 0.17572700  | -2.77558100 |
| F | 3.41037900  | -2.03017300 | -2.94446500 |
| F | 1.11229400  | -2.14698200 | -1.63895800 |
| F | -0.69961000 | -0.31157400 | -2.68153600 |
| F | -2.72986600 | -1.68518600 | -3.73492900 |
| F | -4.39480900 | -3.12671500 | -2.13090100 |
| F | -3.96478400 | -3.16940600 | 0.55958100  |
| F | -1.93648800 | -1.82935600 | 1.62590300  |
| O | 2.62270500  | 0.71227200  | 2.14500700  |
| C | 3.31319700  | 1.83137800  | 2.72879700  |
| H | 3.23424300  | 1.79107600  | 3.81711900  |
| H | 4.35012600  | 1.72695700  | 2.41477200  |
| H | 2.88884300  | 2.76543700  | 2.35774900  |
| C | 0.95548300  | -1.69575600 | 2.06373200  |
| C | 0.66010200  | -2.89360200 | 1.35452700  |
| C | 1.54162200  | -1.80339000 | 3.35912700  |
| C | 0.95370800  | -4.12406000 | 1.90455600  |
| H | 0.24520900  | -2.83604900 | 0.35636300  |
| C | 1.78919500  | -3.04055100 | 3.91913400  |
| H | 1.76431400  | -0.91049100 | 3.93490200  |
| C | 1.50471800  | -4.19839900 | 3.18894800  |
| H | 0.74841800  | -5.03143600 | 1.34751600  |

|   |            |             |            |
|---|------------|-------------|------------|
| H | 2.21028200 | -3.11299800 | 4.91554500 |
| H | 1.71587100 | -5.17046400 | 3.62473300 |

**TS<sub>3-6</sub>**

E (SMD/M06-2X/6-31G(d)) = -2705.47849494

G (SMD/M06-2X/6-31G(d)) = -2705.242121

E (SMD/M06-2X/def2-TZVP//SMD/M06-2X/6-31G(d)) = -2706.63722595

|   |             |             |             |
|---|-------------|-------------|-------------|
| C | -0.96406400 | 0.46023100  | 2.10819800  |
| C | -1.93583400 | 0.95575300  | 1.23148800  |
| O | 0.15767200  | -0.05928300 | 1.76905100  |
| B | 0.55120700  | -0.07460200 | 0.29156000  |
| C | 1.67701400  | -1.24473500 | 0.17246900  |
| C | 1.72187700  | -2.23386400 | -0.80091200 |
| C | 2.73427600  | -1.25681600 | 1.07776900  |
| C | 2.72619200  | -3.19123600 | -0.86827200 |
| C | 3.75575700  | -2.19507900 | 1.04892800  |
| C | 3.74894300  | -3.17296100 | 0.06590800  |
| C | 1.25088600  | 1.34532100  | -0.09776800 |
| C | 1.42330100  | 2.44406800  | 0.73092900  |
| C | 1.81015700  | 1.47067000  | -1.36538800 |
| C | 2.11267000  | 3.58816800  | 0.34142700  |
| C | 2.50012000  | 2.58915900  | -1.79878900 |
| C | 2.65739600  | 3.65968100  | -0.92860100 |
| C | -0.83956100 | -0.37972400 | -0.51549200 |
| C | -1.52679500 | -1.56265800 | -0.20534700 |
| C | -1.44764300 | 0.41837900  | -1.49348700 |
| C | -2.76207900 | -1.89070300 | -0.72400800 |
| C | -2.68207800 | 0.11798400  | -2.04700900 |
| C | -3.35588800 | -1.02278900 | -1.63597900 |
| F | 2.80944400  | -0.31648700 | 2.03390400  |
| F | 4.74343300  | -2.16098200 | 1.94653600  |
| F | 4.72035600  | -4.08311000 | 0.01726700  |
| F | 2.71551200  | -4.12381300 | -1.82340500 |
| F | 0.77150300  | -2.30908600 | -1.74626600 |
| F | -0.90717800 | 1.57370200  | -1.87875100 |
| F | -3.26739300 | 0.95502000  | -2.90244800 |
| F | -4.57196000 | -1.27734800 | -2.09268200 |
| F | -3.41731000 | -2.97868800 | -0.32443700 |
| F | -1.01512700 | -2.39173700 | 0.71137500  |
| F | 0.91119900  | 2.47222600  | 1.97582300  |
| F | 2.24921000  | 4.61618800  | 1.18227400  |
| F | 3.31839400  | 4.74883900  | -1.31824700 |
| F | 3.00797600  | 2.65364800  | -3.03133700 |
| F | 1.65053900  | 0.46567100  | -2.24467600 |
| O | -1.16573700 | 0.71681900  | 3.38216800  |
| C | -0.03841400 | 0.56433000  | 4.27443300  |
| C | -3.30734200 | 0.67455900  | 1.11825000  |

|   |             |             |             |
|---|-------------|-------------|-------------|
| C | -3.91119700 | -0.46258800 | 1.72441000  |
| C | -4.10889100 | 1.52723000  | 0.31374700  |
| C | -5.25964700 | -0.71269400 | 1.55212100  |
| H | -3.29275700 | -1.13607400 | 2.31343600  |
| C | -5.45627400 | 1.26370300  | 0.13412800  |
| H | -3.63296600 | 2.37900900  | -0.16471900 |
| C | -6.02526600 | 0.14732600  | 0.75406000  |
| H | -5.72091200 | -1.57777900 | 2.01622800  |
| H | -6.06569000 | 1.91242500  | -0.48552800 |
| H | -7.08115600 | -0.06199200 | 0.60947300  |
| H | -0.39066600 | 0.94091100  | 5.23261100  |
| H | 0.23025700  | -0.49038600 | 4.34955700  |
| H | 0.80927300  | 1.14591400  | 3.91376000  |

## 6

E (SMD/M06-2X/6-31G(d)) = -2705.575105

G (SMD/M06-2X/6-31G(d)) = -2705.337091

E (SMD/M06-2X/def2-TZVP//SMD/M06-2X/6-31G(d)) = -2706.7325746

|   |             |             |             |
|---|-------------|-------------|-------------|
| C | -1.02185800 | -1.93286300 | 0.92169100  |
| C | -1.81564400 | -1.48141700 | -0.07622000 |
| O | 0.31362500  | -1.68508700 | 0.98725200  |
| B | 0.90960100  | -0.45180900 | 0.98287100  |
| C | 2.46565300  | -0.44729100 | 0.80963900  |
| C | 3.16166300  | -1.54866800 | 0.29802500  |
| C | 3.25098600  | 0.65924100  | 1.14773200  |
| C | 4.53758500  | -1.54964500 | 0.12182300  |
| C | 4.62648900  | 0.68639700  | 0.99008700  |
| C | 5.27186900  | -0.42699900 | 0.47149600  |
| C | 0.04740200  | 0.86089200  | 1.12981100  |
| C | -1.01807800 | 0.96366300  | 2.01764400  |
| C | 0.24791400  | 1.95193100  | 0.28864300  |
| C | -1.84976200 | 2.07114900  | 2.07242800  |
| C | -0.56844400 | 3.07110000  | 0.30134700  |
| C | -1.62016500 | 3.13077000  | 1.20651100  |
| C | -1.21533600 | -0.75464200 | -1.21379300 |
| C | -0.14004900 | -1.25193800 | -1.95091800 |
| C | -1.69285200 | 0.50353300  | -1.58746500 |
| C | 0.45871700  | -0.52220000 | -2.97040900 |
| C | -1.12228700 | 1.24385700  | -2.60902000 |
| C | -0.03842000 | 0.72712000  | -3.30662300 |
| F | 2.69332000  | 1.75805300  | 1.66203300  |
| F | 5.33077200  | 1.76200700  | 1.33422900  |
| F | 6.58745100  | -0.41709400 | 0.31198600  |
| F | 5.15627400  | -2.61829700 | -0.37518800 |
| F | 2.52357200  | -2.66049800 | -0.05873000 |
| F | -2.68250100 | 1.06644100  | -0.88946000 |
| F | -1.57454600 | 2.46516400  | -2.88960700 |

|   |             |             |             |
|---|-------------|-------------|-------------|
| F | 0.52697000  | 1.43346300  | -4.28000800 |
| F | 1.49276300  | -1.02840700 | -3.64023100 |
| F | 0.36508400  | -2.45314200 | -1.66918400 |
| F | -1.28390600 | -0.04362000 | 2.86164200  |
| F | -2.86004900 | 2.12132200  | 2.93682500  |
| F | -2.41024000 | 4.19535500  | 1.23539000  |
| F | -0.36398100 | 4.07237400  | -0.55058300 |
| F | 1.22968500  | 1.91756700  | -0.62017400 |
| O | -1.47740300 | -2.73048200 | 1.88560800  |
| C | -0.61128800 | -3.06278100 | 2.97554700  |
| C | -3.28705000 | -1.67258300 | -0.05231600 |
| C | -4.02455400 | -1.47975200 | 1.12397100  |
| C | -3.97253200 | -1.98919100 | -1.23150600 |
| C | -5.40763800 | -1.62865100 | 1.12312300  |
| H | -3.50695900 | -1.19837200 | 2.03609700  |
| C | -5.35734800 | -2.13313300 | -1.23158400 |
| H | -3.41429800 | -2.12853000 | -2.15393300 |
| C | -6.08004600 | -1.95828300 | -0.05327300 |
| H | -5.96387500 | -1.47387500 | 2.04310000  |
| H | -5.87153900 | -2.38399900 | -2.15471600 |
| H | -7.16007700 | -2.07009500 | -0.05248500 |
| H | -1.22094200 | -3.67011200 | 3.64325200  |
| H | 0.24708900  | -3.64020500 | 2.62561300  |
| H | -0.27273100 | -2.16510300 | 3.49703500  |

### TS<sub>2-3</sub>

E (SMD/M06-2X/6-31G(d)) = -2814.9467434

G (SMD/M06-2X/6-31G(d)) = -2814.706040

E (SMD/M06-2X/def2-TZVP//SMD/M06-2X/6-31G(d)) = -2816.14903931

|   |             |             |             |
|---|-------------|-------------|-------------|
| C | -0.68387000 | 1.01596500  | 2.16652100  |
| C | -1.72558400 | 1.55312500  | 1.38926900  |
| O | 0.16365300  | 0.17809800  | 1.69648100  |
| B | 0.47239800  | -0.17665100 | 0.22555500  |
| C | 1.86188500  | -1.04089500 | 0.31667900  |
| C | 2.12209000  | -2.26048000 | -0.29892200 |
| C | 2.94601300  | -0.49498800 | 1.00015200  |
| C | 3.34493600  | -2.91555400 | -0.21046500 |
| C | 4.18160600  | -1.11362100 | 1.11666500  |
| C | 4.38183000  | -2.34072000 | 0.50441600  |
| C | 0.85099400  | 1.17009800  | -0.62096000 |
| C | 1.13135500  | 2.43235900  | -0.11219800 |
| C | 1.10123100  | 1.02623700  | -1.98339600 |
| C | 1.56497600  | 3.49375400  | -0.89960100 |
| C | 1.53403200  | 2.05217400  | -2.80596200 |
| C | 1.76717300  | 3.30429600  | -2.25512200 |
| C | -0.80507200 | -1.03192200 | -0.32135200 |
| C | -1.11559900 | -2.23267800 | 0.31350700  |

|   |             |             |             |
|---|-------------|-------------|-------------|
| C | -1.71071700 | -0.64556700 | -1.30117000 |
| C | -2.22243200 | -3.00816000 | 0.00945300  |
| C | -2.83541500 | -1.38941300 | -1.63906500 |
| C | -3.09564300 | -2.57594800 | -0.97730600 |
| F | 2.83416500  | 0.71450200  | 1.57781600  |
| F | 5.17649200  | -0.53512700 | 1.79353800  |
| F | 5.55977900  | -2.95555000 | 0.59708500  |
| F | 3.52867500  | -4.09217900 | -0.81410300 |
| F | 1.18571200  | -2.88691000 | -1.02678400 |
| F | -1.58560700 | 0.52584000  | -1.94420500 |
| F | -3.69276200 | -0.94284800 | -2.56042900 |
| F | -4.19485700 | -3.27322900 | -1.25745900 |
| F | -2.46706400 | -4.14566700 | 0.66486600  |
| F | -0.30990500 | -2.69633900 | 1.28257000  |
| F | 1.00392000  | 2.71079800  | 1.19990000  |
| F | 1.80149500  | 4.68886200  | -0.35253800 |
| F | 2.18730400  | 4.30924100  | -3.02222800 |
| F | 1.74095300  | 1.84847100  | -4.10870200 |
| F | 0.92004900  | -0.17556200 | -2.55681200 |
| O | -0.47503700 | 1.46874200  | 3.37941200  |
| C | 0.80238100  | 1.18146100  | 3.99087000  |
| C | -2.98271000 | 1.00796500  | 0.98295500  |
| C | -3.53762400 | -0.13181000 | 1.60569500  |
| C | -3.66350200 | 1.61573700  | -0.09441200 |
| C | -4.73161900 | -0.66194600 | 1.14059200  |
| H | -3.01337700 | -0.58906300 | 2.44071900  |
| C | -4.86485800 | 1.09104500  | -0.54279000 |
| H | -3.22018300 | 2.48726300  | -0.56635500 |
| C | -5.39170600 | -0.04893900 | 0.07152200  |
| H | -5.15215700 | -1.54905900 | 1.60340000  |
| H | -5.38646000 | 1.55069000  | -1.37541900 |
| H | -6.32579000 | -0.46861200 | -0.29034000 |
| H | 0.76885800  | 1.69842300  | 4.94777500  |
| H | 0.91140700  | 0.10640700  | 4.13756800  |
| H | 1.60656000  | 1.56537300  | 3.36537500  |
| N | -2.19184200 | 3.09561800  | 2.47314700  |
| N | -2.46527600 | 4.15423000  | 2.59489000  |

**TS<sub>1-7</sub>**

E (SMD/M06-2X/6-31G(d)) = -2814.95923088

G (SMD/M06-2X/6-31G(d)) = -2814.713958

E (SMD/M06-2X/def2-TZVP//SMD/M06-2X/6-31G(d)) = -2816.15671545

|   |             |            |            |
|---|-------------|------------|------------|
| C | 1.25726200  | 1.56295500 | 2.07890500 |
| O | 2.43170500  | 1.77498500 | 1.93326700 |
| C | 0.63742000  | 0.19278500 | 2.14996100 |
| N | -0.36561800 | 0.20494800 | 3.07600300 |
| N | -1.18734400 | 0.22323200 | 3.81856600 |



|   |             |             |             |
|---|-------------|-------------|-------------|
| B | -0.10985500 | -0.08847300 | -0.13593000 |
| C | -0.90641800 | 1.25941700  | -0.43549000 |
| C | -0.74791700 | 1.97355100  | -1.62285400 |
| C | -1.95826700 | 1.68210200  | 0.37056900  |
| C | -1.53146700 | 3.07104500  | -1.95264700 |
| C | -2.75395500 | 2.77921600  | 0.08737100  |
| C | -2.53369300 | 3.48213900  | -1.08816500 |
| C | -1.09112500 | -1.35633400 | -0.19301200 |
| C | -1.38558200 | -1.75281100 | -1.49796700 |
| C | -1.75905000 | -2.05906800 | 0.79610900  |
| C | -2.25589300 | -2.78007300 | -1.81516200 |
| C | -2.63918600 | -3.10067000 | 0.52358900  |
| C | -2.89086800 | -3.46363600 | -0.78761100 |
| C | 1.38197700  | -0.26108900 | -0.63261200 |
| C | 1.96054400  | -1.51097900 | -0.88051100 |
| C | 2.23790700  | 0.82977200  | -0.82267900 |
| C | 3.28183000  | -1.67214300 | -1.26894400 |
| C | 3.56345800  | 0.70653300  | -1.20151800 |
| C | 4.08924600  | -0.55693400 | -1.42680300 |
| F | -2.23772500 | 1.00362300  | 1.49359200  |
| F | -3.72916500 | 3.14981300  | 0.91573500  |
| F | -3.28855300 | 4.53218400  | -1.39024300 |
| F | -1.33537600 | 3.72200300  | -3.09833000 |
| F | 0.16506900  | 1.60585200  | -2.52681600 |
| F | 1.79783600  | 2.07863400  | -0.63044500 |
| F | 4.32993700  | 1.78400800  | -1.35513100 |
| F | 5.35629500  | -0.69702900 | -1.79265400 |
| F | 3.77951900  | -2.88803000 | -1.48720900 |
| F | 1.25891800  | -2.63800000 | -0.73621400 |
| F | -0.79080800 | -1.10896500 | -2.51649000 |
| F | -2.48881400 | -3.11299900 | -3.08350000 |
| F | -3.73280100 | -4.45526000 | -1.06196200 |
| F | -3.24441100 | -3.74466700 | 1.52086400  |
| F | -1.58304200 | -1.77308000 | 2.09473500  |
| O | 0.30305900  | 2.48583200  | 2.17021600  |
| C | 0.74195700  | 3.84678000  | 2.01495600  |
| H | 1.21556200  | 3.97028100  | 1.03952200  |
| H | -0.16066800 | 4.45080600  | 2.08631500  |
| H | 1.44405500  | 4.10733900  | 2.80876600  |
| C | 1.55363717  | -1.01508411 | 2.42051286  |
| C | 2.93157078  | -0.83233354 | 2.54039876  |
| C | 1.00595528  | -2.29175605 | 2.54581818  |
| C | 3.76163032  | -1.92616162 | 2.78486354  |
| H | 3.36312321  | 0.17418681  | 2.44079420  |
| C | 1.83602629  | -3.38588209 | 2.79133847  |
| H | -0.08006903 | -2.43594628 | 2.45153454  |
| C | 3.21368813  | -3.20331942 | 2.91073592  |

|   |            |             |            |
|---|------------|-------------|------------|
| H | 4.84780779 | -1.78228348 | 2.87874693 |
| H | 1.40387810 | -4.39230619 | 2.89049843 |
| H | 3.86835313 | -4.06560398 | 3.10354515 |

7

E (SMD/M06-2X/6-31G(d)) = -2814.96468024

G (SMD/M06-2X/6-31G(d)) = -2814.717258

E (SMD/M06-2X/def2-TZVP//SMD/M06-2X/6-31G(d)) = -2816.1620834

|   |             |             |             |
|---|-------------|-------------|-------------|
| C | -0.36167600 | -1.65813900 | 2.24218100  |
| O | -1.24953600 | -2.45930700 | 2.13565800  |
| C | -0.48168700 | -0.15468300 | 1.89715200  |
| N | 0.29219800  | 0.45296100  | 2.94944300  |
| N | 0.82860200  | 0.90648500  | 3.79458200  |
| B | 0.13776100  | 0.00751600  | 0.18066700  |
| C | 1.62929100  | -0.63832100 | -0.07177300 |
| C | 1.96317900  | -1.23356800 | -1.29086900 |
| C | 2.71486600  | -0.48361400 | 0.78382100  |
| C | 3.23426200  | -1.69165700 | -1.60839600 |
| C | 4.00080100  | -0.93104200 | 0.51441000  |
| C | 4.26589400  | -1.54610000 | -0.69622200 |
| C | 0.27510100  | 1.55871100  | -0.34505000 |
| C | 0.06184100  | 1.87270000  | -1.69094000 |
| C | 0.80204000  | 2.61680300  | 0.38587000  |
| C | 0.28203800  | 3.12720400  | -2.24063200 |
| C | 1.03161000  | 3.89141200  | -0.11408400 |
| C | 0.76822300  | 4.15278200  | -1.44609400 |
| C | -1.07479600 | -0.82958400 | -0.53910000 |
| C | -2.25913100 | -0.23552700 | -0.97344200 |
| C | -1.04553400 | -2.21348900 | -0.69603400 |
| C | -3.31745400 | -0.93744100 | -1.53145100 |
| C | -2.07757700 | -2.95763300 | -1.24730300 |
| C | -3.22693600 | -2.31210100 | -1.67260200 |
| F | 2.56677400  | 0.15014400  | 1.96051300  |
| F | 4.97855900  | -0.75425600 | 1.40529600  |
| F | 5.49104400  | -1.97832200 | -0.98401800 |
| F | 3.46889700  | -2.26309500 | -2.79100000 |
| F | 1.04508300  | -1.39400500 | -2.25457900 |
| F | 0.02089600  | -2.91953700 | -0.28121700 |
| F | -1.97382800 | -4.28319200 | -1.36259400 |
| F | -4.23402900 | -3.00452900 | -2.19864400 |
| F | -4.42759000 | -0.29945100 | -1.90896300 |
| F | -2.45191700 | 1.08415200  | -0.84113900 |
| F | -0.37073200 | 0.94316100  | -2.55394400 |
| F | 0.03942900  | 3.34805800  | -3.53321300 |
| F | 0.98540700  | 5.36130600  | -1.95767000 |
| F | 1.51771400  | 4.84903800  | 0.67664800  |
| F | 1.12630900  | 2.45230900  | 1.68549900  |

|   |             |             |            |
|---|-------------|-------------|------------|
| O | 0.87787600  | -1.93703100 | 2.61873800 |
| C | 1.16395600  | -3.33139400 | 2.83846400 |
| H | 0.95241700  | -3.89280800 | 1.92736300 |
| H | 2.22334900  | -3.37134700 | 3.08381700 |
| H | 0.55981300  | -3.70929700 | 3.66487700 |
| C | -1.86342000 | 0.50170200  | 2.02701900 |
| C | -3.04677500 | -0.22767600 | 1.88011200 |
| C | -1.93185100 | 1.88620400  | 2.21659100 |
| C | -4.27382500 | 0.43231400  | 1.90764500 |
| H | -3.01950500 | -1.29686500 | 1.72308500 |
| C | -3.16157200 | 2.53387200  | 2.25512300 |
| H | -1.02974600 | 2.47710400  | 2.34038700 |
| C | -4.33921900 | 1.80940700  | 2.09348400 |
| H | -5.18403600 | -0.14568100 | 1.78023800 |
| H | -3.19177200 | 3.60835100  | 2.40479000 |
| H | -5.29968200 | 2.31466500  | 2.11273700 |

### TS<sub>7-5</sub>

E (SMD/M06-2X/6-31G(d)) = -2814.95641647

G (SMD/M06-2X/6-31G(d)) = -2814.713112

E (SMD/M06-2X/def2-TZVP//SMD/M06-2X/6-31G(d)) = -2816.15675456

|   |             |             |             |
|---|-------------|-------------|-------------|
| C | -0.57542800 | -1.86571600 | 1.99651300  |
| O | -0.62285000 | -2.74650600 | 1.17981600  |
| C | -0.60384200 | -0.37390600 | 1.60138000  |
| N | 0.41399100  | 0.22541600  | 3.01859500  |
| N | 0.87310900  | 0.63116600  | 3.92728500  |
| B | 0.11802600  | -0.02064500 | 0.11652800  |
| C | 1.56716600  | -0.74682400 | -0.11676300 |
| C | 2.12173300  | -0.66325000 | -1.39355700 |
| C | 2.37556500  | -1.38045300 | 0.81286800  |
| C | 3.36747800  | -1.16253000 | -1.73249200 |
| C | 3.63236400  | -1.89982200 | 0.52425800  |
| C | 4.13512200  | -1.78714600 | -0.75912400 |
| C | 0.41167000  | 1.57490600  | -0.18040000 |
| C | -0.01159100 | 2.30062800  | -1.29577400 |
| C | 1.33269100  | 2.26538200  | 0.60741400  |
| C | 0.35345200  | 3.62023900  | -1.54036600 |
| C | 1.72565000  | 3.57930300  | 0.40542800  |
| C | 1.21843900  | 4.27302500  | -0.68014100 |
| C | -1.06791600 | -0.66579800 | -0.84843700 |
| C | -2.29072800 | -0.02405300 | -1.05692900 |
| C | -0.95617700 | -1.89308100 | -1.50700300 |
| C | -3.32441900 | -0.53959700 | -1.82433200 |
| C | -1.96476000 | -2.44041600 | -2.28966000 |
| C | -3.16184900 | -1.76404000 | -2.44852500 |
| F | 1.96874700  | -1.53624100 | 2.09324300  |
| F | 4.35336500  | -2.49580100 | 1.47582800  |

|   |             |             |             |
|---|-------------|-------------|-------------|
| F | 5.33720900  | -2.27462600 | -1.05943700 |
| F | 3.83374000  | -1.05412400 | -2.97764900 |
| F | 1.41312200  | -0.08812300 | -2.37915000 |
| F | 0.14800300  | -2.64189900 | -1.42311000 |
| F | -1.78624400 | -3.62128900 | -2.88722400 |
| F | -4.13703900 | -2.28045900 | -3.19204200 |
| F | -4.46448200 | 0.14005500  | -1.96994800 |
| F | -2.52940700 | 1.18082300  | -0.52038000 |
| F | -0.77377400 | 1.75393800  | -2.25071000 |
| F | -0.10779000 | 4.25320500  | -2.62061100 |
| F | 1.57791500  | 5.53384400  | -0.90666800 |
| F | 2.59885200  | 4.16345000  | 1.22785800  |
| F | 1.93631300  | 1.63517500  | 1.63417300  |
| O | -0.55422100 | -2.04313100 | 3.30848900  |
| C | -0.48657300 | -3.41485000 | 3.74045500  |
| H | 0.40290400  | -3.88821800 | 3.32029300  |
| H | -0.42679900 | -3.37292900 | 4.82600100  |
| H | -1.38308400 | -3.94941600 | 3.42180700  |
| C | -1.88500500 | 0.28514700  | 1.99640000  |
| C | -1.95393900 | 1.66682700  | 2.21725900  |
| C | -3.05056100 | -0.48732100 | 2.05421400  |
| C | -3.17565900 | 2.26508200  | 2.48809500  |
| H | -1.05141800 | 2.27109200  | 2.19381200  |
| C | -4.27853400 | 0.12630800  | 2.28486400  |
| H | -3.01509900 | -1.55885000 | 1.87552700  |
| C | -4.34190400 | 1.49859300  | 2.50720300  |
| H | -3.22083000 | 3.33318500  | 2.67389400  |
| H | -5.18170900 | -0.47471300 | 2.30167500  |
| H | -5.29864600 | 1.97291000  | 2.70211600  |

### TS<sub>5-8</sub>

E (SMD/M06-2X/6-31G(d)) = -3069.17425587

G (SMD/M06-2X/6-31G(d)) = -3068.809988

E (SMD/M06-2X/def2-TZVP//SMD/M06-2X/6-31G(d)) = -3070.45912399

|   |             |             |             |
|---|-------------|-------------|-------------|
| C | 1.78928500  | 0.86027300  | -0.70341400 |
| O | 1.40623400  | 1.94006500  | -1.08900700 |
| C | 1.04425800  | 0.07989100  | 0.37408000  |
| B | -0.57886100 | -0.10757500 | -0.02307500 |
| C | -1.28014600 | 0.94679100  | -1.07479500 |
| C | -1.96359500 | 0.59473100  | -2.23700800 |
| C | -1.41702200 | 2.28776800  | -0.73064300 |
| C | -2.66044300 | 1.50567600  | -3.02574700 |
| C | -2.09443200 | 3.23152200  | -1.48370600 |
| C | -2.72367900 | 2.83558800  | -2.65369700 |
| C | -1.71316900 | -0.20853300 | 1.15123500  |
| C | -2.89807700 | -0.89705100 | 0.89293400  |
| C | -1.73259500 | 0.53797400  | 2.32169400  |

|   |             |             |             |
|---|-------------|-------------|-------------|
| C | -3.99525800 | -0.89493800 | 1.73855300  |
| C | -2.80744900 | 0.57071400  | 3.20269700  |
| C | -3.95066800 | -0.15025100 | 2.90832100  |
| C | -0.22373200 | -1.55146700 | -0.77298900 |
| C | -0.38910000 | -2.79637400 | -0.16340800 |
| C | 0.41925600  | -1.59722100 | -2.00909200 |
| C | 0.04379800  | -3.98695000 | -0.72489400 |
| C | 0.87413600  | -2.76451200 | -2.60452000 |
| C | 0.68867500  | -3.97225700 | -1.95351300 |
| F | -0.88907900 | 2.72218500  | 0.42282200  |
| F | -2.16247900 | 4.50555800  | -1.08498300 |
| F | -3.38970500 | 3.71869300  | -3.39713100 |
| F | -3.27916200 | 1.09677700  | -4.13722400 |
| F | -2.00741600 | -0.67168500 | -2.67983500 |
| F | 0.63282300  | -0.46579000 | -2.70225000 |
| F | 1.48361300  | -2.73107100 | -3.79060200 |
| F | 1.11547700  | -5.10636400 | -2.50162200 |
| F | -0.14936100 | -5.14610100 | -0.09400400 |
| F | -0.97206600 | -2.90037600 | 1.03809700  |
| F | -3.02032800 | -1.60221500 | -0.24226100 |
| F | -5.09482600 | -1.58712000 | 1.43387500  |
| F | -4.99442800 | -0.13169100 | 3.73563600  |
| F | -2.74415600 | 1.29549200  | 4.32213000  |
| F | -0.65830100 | 1.25974200  | 2.69246600  |
| O | 2.85031500  | 0.24294500  | -1.21972900 |
| C | 3.47621500  | 0.91665500  | -2.31898700 |
| H | 3.80683700  | 1.91074200  | -2.01359900 |
| H | 4.32760400  | 0.29598100  | -2.59446900 |
| H | 2.77299600  | 0.99718700  | -3.15086800 |
| C | 1.69272800  | -0.98395900 | 1.17277800  |
| C | 1.07752300  | -1.37968500 | 2.37994000  |
| C | 2.83663800  | -1.70192400 | 0.76289700  |
| C | 1.57776700  | -2.42147000 | 3.14381900  |
| H | 0.21786900  | -0.83361900 | 2.74337700  |
| C | 3.31328200  | -2.77153700 | 1.51631400  |
| H | 3.33199900  | -1.45950400 | -0.16450300 |
| C | 2.69579100  | -3.13420600 | 2.70890900  |
| H | 1.08790700  | -2.68423100 | 4.07601000  |
| H | 4.17959000  | -3.32124000 | 1.16134200  |
| H | 3.07891500  | -3.96360900 | 3.29544600  |
| C | 3.43912400  | 1.74492800  | 1.52513800  |
| C | 3.55248700  | 2.95318000  | 0.80259600  |
| C | 4.70623800  | 3.32271100  | 0.11803700  |
| C | 5.77899200  | 2.43820300  | 0.17124600  |
| C | 5.69723900  | 1.23657700  | 0.89396300  |
| C | 4.54015200  | 0.88189200  | 1.57947200  |
| C | 2.08795700  | 1.69475300  | 2.04186200  |

|   |            |             |             |
|---|------------|-------------|-------------|
| C | 1.50036200 | 2.91643300  | 1.69877600  |
| H | 4.76394700 | 4.25865500  | -0.42888100 |
| H | 6.69919200 | 2.68739600  | -0.34795100 |
| H | 6.56060600 | 0.57920600  | 0.92696500  |
| H | 4.49437800 | -0.03697000 | 2.15518800  |
| H | 1.71282600 | 1.04214600  | 2.81191700  |
| H | 0.52842700 | 3.30127700  | 1.95956000  |
| N | 2.34680200 | 3.63137300  | 0.94670000  |
| H | 2.12051400 | 4.51288700  | 0.49971100  |

**8**

E (SMD/M06-2X/6-31G(d)) = -2705.43966576

G (SMD/M06-2X/6-31G(d)) = -2705.207445

E (SMD/M06-2X/def2-TZVP//SMD/M06-2X/6-31G(d)) = -2706.60023944

|   |             |             |             |
|---|-------------|-------------|-------------|
| C | -1.92356000 | 0.00927700  | -1.39667000 |
| O | -1.87894700 | -0.87928500 | -2.23394800 |
| C | -1.37128800 | -0.21861200 | 0.01689600  |
| B | 0.39722000  | 0.01486500  | -0.07575700 |
| C | 1.26114700  | -0.96064900 | -1.11392400 |
| C | 2.17482300  | -0.55355600 | -2.09080800 |
| C | 1.34590600  | -2.32767200 | -0.84521200 |
| C | 2.97279400  | -1.43070300 | -2.82077000 |
| C | 2.11654700  | -3.24279100 | -1.54425100 |
| C | 2.93910600  | -2.78814300 | -2.56083400 |
| C | 1.29796500  | -0.24539900 | 1.31208400  |
| C | 2.56327300  | 0.35803800  | 1.35500000  |
| C | 1.10323500  | -1.12905800 | 2.36966300  |
| C | 3.49468600  | 0.19071300  | 2.36587600  |
| C | 2.00448200  | -1.33009300 | 3.41247700  |
| C | 3.21145400  | -0.66154000 | 3.42090300  |
| C | 0.45970600  | 1.61318800  | -0.51537700 |
| C | 0.61017800  | 2.66641900  | 0.38522800  |
| C | 0.19903700  | 2.03721600  | -1.81442600 |
| C | 0.51908300  | 4.00825400  | 0.04039900  |
| C | 0.07723600  | 3.36112800  | -2.20802800 |
| C | 0.24524000  | 4.36459600  | -1.26889800 |
| F | 0.65466200  | -2.84416800 | 0.19498000  |
| F | 2.09085400  | -4.53963900 | -1.22664300 |
| F | 3.69933400  | -3.63479700 | -3.25255600 |
| F | 3.79975600  | -0.95888900 | -3.75668500 |
| F | 2.39857100  | 0.73708300  | -2.37327900 |
| F | -0.00897900 | 1.13111200  | -2.78944000 |
| F | -0.21142600 | 3.66719400  | -3.47750600 |
| F | 0.13321100  | 5.64670600  | -1.61596400 |
| F | 0.65016400  | 4.95607200  | 0.97413100  |
| F | 0.80244700  | 2.43527100  | 1.69386900  |
| F | 2.96505300  | 1.15722100  | 0.35100100  |

|   |             |             |             |
|---|-------------|-------------|-------------|
| F | 4.66690400  | 0.82944000  | 2.32190100  |
| F | 4.09057200  | -0.84454800 | 4.40522300  |
| F | 1.71083900  | -2.19070200 | 4.39176200  |
| F | 0.01012200  | -1.91430800 | 2.46495800  |
| O | -2.48166000 | 1.17701200  | -1.67037200 |
| C | -2.97896400 | 1.34908000  | -3.00607800 |
| H | -3.77568100 | 0.62904100  | -3.20255400 |
| H | -3.36607400 | 2.36655900  | -3.03935800 |
| H | -2.17139600 | 1.21877700  | -3.72660700 |
| C | -1.83826400 | 0.76074500  | 1.11500300  |
| C | -1.84772600 | 0.32983100  | 2.45217700  |
| C | -2.18585300 | 2.10453700  | 0.89592900  |
| C | -2.18185200 | 1.17631200  | 3.50560300  |
| H | -1.61371900 | -0.69565100 | 2.69874800  |
| C | -2.52111500 | 2.95537400  | 1.94854700  |
| H | -2.17998700 | 2.52010200  | -0.10033500 |
| C | -2.52218400 | 2.50299900  | 3.26273400  |
| H | -2.17455800 | 0.78683400  | 4.51949100  |
| H | -2.77550800 | 3.98789400  | 1.72529300  |
| H | -2.78004000 | 3.16965400  | 4.08002100  |
| C | -3.53000900 | -1.69208400 | 0.44815300  |
| C | -4.01097500 | -2.72090700 | -0.36639400 |
| C | -5.33675600 | -3.10005300 | -0.47109800 |
| C | -6.24884500 | -2.37765500 | 0.29547200  |
| C | -5.81273400 | -1.33703700 | 1.11556400  |
| C | -4.46218300 | -0.98686800 | 1.20612700  |
| C | -2.00277900 | -1.63487700 | 0.29684800  |
| C | -1.80569300 | -2.65044700 | -0.79337300 |
| H | -5.64290100 | -3.91263600 | -1.12146800 |
| H | -7.30400700 | -2.62620400 | 0.24946400  |
| H | -6.53761400 | -0.78103500 | 1.70145600  |
| H | -4.16857100 | -0.17535900 | 1.85860100  |
| H | -1.53693700 | -2.08807400 | 1.17816100  |
| H | -0.89172500 | -2.97266200 | -1.26147600 |
| N | -2.90828600 | -3.27742000 | -1.05624000 |
| H | -2.98398600 | -4.03624700 | -1.73143500 |

(H<sub>2</sub>O)<sub>3</sub>

E (SMD/M06-2X/6-31G(d)) = -229.167064366

G (SMD/M06-2X/6-31G(d)) = -229.125684

E (SMD/M06-2X/def2-TZVP//SMD/M06-2X/6-31G(d)) = -229.316594783

|   |             |             |             |
|---|-------------|-------------|-------------|
| O | 1.09731800  | -1.36969400 | 0.01130400  |
| H | 1.27040200  | -0.41589700 | -0.08785400 |
| H | 0.13090600  | -1.37890900 | 0.09438100  |
| O | 0.72643000  | 1.45440200  | -0.10624900 |
| H | -0.18173400 | 1.09401700  | -0.07103700 |
| H | 0.89271500  | 1.76961800  | 0.79536700  |

|   |             |             |             |
|---|-------------|-------------|-------------|
| O | -1.55251000 | -0.17570600 | 0.01430400  |
| H | -2.21415400 | -0.08551200 | 0.71924200  |
| H | -2.06803800 | -0.25533500 | -0.80497000 |

(H<sub>2</sub>O)<sub>3</sub>H<sup>+</sup>

E (SMD/M06-2X/6-31G(d)) = -229.599155882

G (SMD/M06-2X/6-31G(d)) = -229.545852

E (SMD/M06-2X/def2-TZVP//SMD/M06-2X/6-31G(d)) = -229.740937092

|   |             |             |             |
|---|-------------|-------------|-------------|
| H | -2.08011700 | -1.27682300 | -0.39524800 |
| O | -2.13031800 | -0.36548200 | -0.05364700 |
| H | -2.59094200 | -0.42405700 | 0.80359200  |
| H | -0.88388500 | 0.32043500  | 0.03004400  |
| O | 0.00079200  | 0.90031500  | 0.07965400  |
| H | 0.00134300  | 1.53595400  | -0.66604400 |
| H | 0.88078400  | 0.31719200  | 0.03003800  |
| O | 2.11273200  | -0.40996100 | -0.07992500 |
| H | 2.78184200  | -0.10254300 | 0.55930300  |
| H | 2.02532800  | -1.36913800 | 0.06966200  |

**TS<sub>8-9</sub>**

E (SMD/M06-2X/6-31G(d)) = -3298.3784198

G (SMD/M06-2X/6-31G(d)) = -3297.947061

E (SMD/M06-2X/def2-TZVP//SMD/M06-2X/6-31G(d)) = -3299.80455391

|   |             |             |             |
|---|-------------|-------------|-------------|
| C | 1.59385900  | 0.57862400  | 1.01027700  |
| O | 2.05964100  | 1.63937600  | 1.39427600  |
| C | 1.04305600  | 0.24116000  | -0.37278100 |
| B | -0.70867800 | 0.08181200  | 0.04948600  |
| C | -1.16221200 | -1.19982800 | 1.00271400  |
| C | -2.42227000 | -1.13773800 | 1.60202900  |
| C | -0.53599000 | -2.42894500 | 1.16799300  |
| C | -2.99648200 | -2.15708100 | 2.34414400  |
| C | -1.06916300 | -3.48211700 | 1.90475900  |
| C | -2.30848500 | -3.34945600 | 2.50238100  |
| C | -1.80214500 | -0.11897700 | -1.18824700 |
| C | -2.90317600 | 0.69158100  | -1.47678300 |
| C | -1.82520500 | -1.32306200 | -1.89832200 |
| C | -3.83431600 | 0.41198400  | -2.47426300 |
| C | -2.72510400 | -1.64501600 | -2.90147300 |
| C | -3.74156700 | -0.75549700 | -3.20750500 |
| C | -0.92334800 | 1.52534800  | 0.85918200  |
| C | -0.93962300 | 2.76774200  | 0.21762200  |
| C | -0.91873600 | 1.63543400  | 2.25030200  |
| C | -0.92023400 | 3.99072500  | 0.87303900  |
| C | -0.89206800 | 2.83619400  | 2.94876400  |
| C | -0.88958900 | 4.03160000  | 2.25629800  |
| F | 0.64414100  | -2.69815800 | 0.58924500  |
| F | -0.39595000 | -4.63305000 | 2.01880700  |



|   |             |             |             |
|---|-------------|-------------|-------------|
| F | -2.83669400 | -4.35146100 | 3.20748800  |
| F | -4.20317700 | -2.00304200 | 2.89946000  |
| F | -3.16358600 | -0.02065900 | 1.48237000  |
| F | -0.89562700 | 0.54760000  | 3.04356200  |
| F | -0.85269600 | 2.83514100  | 4.28526900  |
| F | -0.86230600 | 5.19693500  | 2.90282800  |
| F | -0.93522600 | 5.13139600  | 0.17647000  |
| F | -0.99354800 | 2.86040300  | -1.11994800 |
| F | -3.18828600 | 1.79386800  | -0.77095100 |
| F | -4.84104900 | 1.25887100  | -2.70426500 |
| F | -4.62752500 | -1.03564700 | -4.16191000 |
| F | -2.63945800 | -2.81322900 | -3.54419100 |
| F | -0.94470400 | -2.29937700 | -1.59724900 |
| O | 1.45234500  | -0.44160700 | 1.85261700  |
| C | 1.88379800  | -0.22888800 | 3.19979500  |
| H | 1.42762000  | 0.67034900  | 3.61532200  |
| H | 1.55821200  | -1.11130000 | 3.74932300  |
| H | 2.97307900  | -0.13972500 | 3.24341000  |
| C | 1.23762600  | 1.36474100  | -1.41388500 |
| C | 0.65621000  | 1.16638700  | -2.67785100 |
| C | 2.09228500  | 2.46660300  | -1.27602100 |
| C | 0.90206400  | 2.01964600  | -3.74721300 |
| H | -0.00689200 | 0.32414700  | -2.83758700 |
| C | 2.33567500  | 3.33126500  | -2.34629800 |
| H | 2.60392400  | 2.65176400  | -0.34441700 |
| C | 1.74854800  | 3.11696300  | -3.58821100 |
| H | 0.43170300  | 1.82476800  | -4.70661800 |
| H | 3.00758000  | 4.17233200  | -2.20050700 |
| H | 1.94745000  | 3.78743300  | -4.41863600 |
| C | 3.07700800  | -1.60038300 | -0.25633200 |
| C | 3.31487700  | -2.79542100 | -0.95306300 |
| C | 4.37541000  | -3.65856700 | -0.68196000 |
| C | 5.24272700  | -3.28391800 | 0.33077900  |
| C | 5.06253800  | -2.06999800 | 1.01678700  |
| C | 4.00388300  | -1.22068700 | 0.72438300  |
| C | 1.94254200  | -0.91626300 | -0.93183100 |
| C | 1.55737000  | -1.83613900 | -1.94863900 |
| H | 4.51354500  | -4.57228500 | -1.25077000 |
| H | 6.08111400  | -3.92425000 | 0.58468500  |
| H | 5.77079100  | -1.78467800 | 1.78856400  |
| H | 3.92639300  | -0.27214400 | 1.24471400  |
| H | 2.73852000  | -0.36452600 | -1.81599600 |
| H | 0.81644800  | -1.71257500 | -2.72257300 |
| N | 2.36347500  | -2.88536200 | -1.96710800 |
| H | 2.34832800  | -3.60680600 | -2.68217300 |
| O | 3.70855100  | 0.16738700  | -2.67258600 |
| H | 3.30167700  | 0.93465900  | -3.11712500 |

|   |            |            |             |
|---|------------|------------|-------------|
| H | 4.41364200 | 0.54428300 | -2.05444300 |
| O | 5.51978400 | 1.01286800 | -0.99646700 |
| H | 5.95977800 | 0.21187900 | -0.66764600 |
| H | 5.19317400 | 1.46408700 | -0.17971600 |
| O | 4.78258900 | 2.10269900 | 1.37968800  |
| H | 5.04970700 | 3.02890400 | 1.49455700  |
| H | 3.82261300 | 2.08196300 | 1.55345300  |

9

E (SMD/M06-2X/6-31G(d)) = -3068.76590755

G (SMD/M06-2X/6-31G(d)) = -3068.409345

E (SMD/M06-2X/def2-TZVP//SMD/M06-2X/6-31G(d)) = -3070.05678867

|   |             |             |             |
|---|-------------|-------------|-------------|
| C | -1.75327600 | -0.50429100 | 1.28760000  |
| O | -1.87543100 | -1.58181800 | 1.83730800  |
| C | -1.38960000 | -0.21590000 | -0.16819500 |
| B | 0.38715500  | 0.03001700  | 0.01869800  |
| C | 0.87062300  | 1.30285700  | 0.97581300  |
| C | 2.17018700  | 1.28111700  | 1.48927000  |
| C | 0.20688400  | 2.50357500  | 1.21455700  |
| C | 2.74830600  | 2.29971500  | 2.22980400  |
| C | 0.74601100  | 3.55238100  | 1.95592000  |
| C | 2.02307300  | 3.45414600  | 2.47400500  |
| C | 1.32825200  | 0.33690800  | -1.32992700 |
| C | 2.48625000  | -0.34269400 | -1.72766000 |
| C | 1.16020300  | 1.53020300  | -2.03553800 |
| C | 3.26803900  | 0.02044300  | -2.82157900 |
| C | 1.90404900  | 1.93515500  | -3.13307700 |
| C | 2.97020900  | 1.15741800  | -3.54805900 |
| C | 0.81585500  | -1.42799600 | 0.70918800  |
| C | 0.96426400  | -2.61482300 | -0.00991400 |
| C | 0.91919200  | -1.61267600 | 2.08624000  |
| C | 1.19188500  | -3.85763100 | 0.56614100  |
| C | 1.15356400  | -2.82988900 | 2.70882600  |
| C | 1.29215300  | -3.97154600 | 1.94102800  |
| F | -1.00640600 | 2.75235700  | 0.71340200  |
| F | 0.03790900  | 4.67247400  | 2.14942000  |
| F | 2.55368400  | 4.45568000  | 3.17994300  |
| F | 3.99696400  | 2.18286200  | 2.69759500  |
| F | 2.96332000  | 0.21514400  | 1.26911500  |
| F | 0.72735400  | -0.58293200 | 2.93481900  |
| F | 1.22123700  | -2.90946900 | 4.04383400  |
| F | 1.50903000  | -5.15793000 | 2.51397500  |
| F | 1.31451700  | -4.94692000 | -0.20269100 |
| F | 0.90221200  | -2.63176900 | -1.35019200 |
| F | 2.98956100  | -1.38156100 | -1.04490500 |
| F | 4.33794100  | -0.71137700 | -3.15018500 |
| F | 3.71594900  | 1.51807900  | -4.59268300 |

|   |             |             |             |
|---|-------------|-------------|-------------|
| F | 1.62803100  | 3.08628200  | -3.75490500 |
| F | 0.24929800  | 2.42669200  | -1.61788000 |
| O | -1.89754500 | 0.63233600  | 1.98505300  |
| C | -2.20732100 | 0.47508300  | 3.36629600  |
| H | -1.45517400 | -0.13943800 | 3.86419700  |
| H | -2.21282600 | 1.48307200  | 3.78168200  |
| H | -3.19212500 | 0.01457100  | 3.48842700  |
| C | -1.57953200 | -1.42020900 | -1.11606600 |
| C | -1.31852700 | -1.19081600 | -2.47759300 |
| C | -2.00844300 | -2.70286200 | -0.75680700 |
| C | -1.44438900 | -2.19175200 | -3.43041300 |
| H | -1.00530000 | -0.19957900 | -2.79325000 |
| C | -2.13901800 | -3.71288100 | -1.71472700 |
| H | -2.22036500 | -2.93169600 | 0.27773000  |
| C | -1.85422100 | -3.47099600 | -3.05207300 |
| H | -1.22222100 | -1.97350000 | -4.47156400 |
| H | -2.46853600 | -4.69930300 | -1.39854300 |
| H | -1.95390100 | -4.26046400 | -3.79155300 |
| C | -3.86482900 | 0.64829600  | -0.30994800 |
| C | -4.58913000 | 1.60739400  | -1.06356000 |
| C | -5.97429200 | 1.77618400  | -0.95962400 |
| C | -6.65771800 | 0.94359500  | -0.09011000 |
| C | -5.97316200 | -0.03907800 | 0.65168100  |
| C | -4.59962300 | -0.19411500 | 0.54898000  |
| C | -2.45782400 | 0.77908700  | -0.66384800 |
| C | -2.42676300 | 1.75848200  | -1.62174700 |
| H | -6.48798900 | 2.53058100  | -1.54871600 |
| H | -7.73406900 | 1.04325700  | 0.01497700  |
| H | -6.53420800 | -0.69189500 | 1.31402800  |
| H | -4.11187200 | -0.97511300 | 1.12331300  |
| H | -1.60586800 | 2.15901800  | -2.18692100 |
| N | -3.68618100 | 2.25886400  | -1.85708600 |
| H | -3.89762300 | 3.01438400  | -2.49386200 |

**TS<sub>9-10</sub>**

E (SMD/M06-2X/6-31G(d)) = -3068.74388018

G (SMD/M06-2X/6-31G(d)) = -3068.390887

E (SMD/M06-2X/def2-TZVP//SMD/M06-2X/6-31G(d)) = -3070.04029122

|   |             |             |             |
|---|-------------|-------------|-------------|
| C | -0.04464100 | -0.39459600 | -2.04631100 |
| O | 0.18960500  | 0.79785800  | -1.76992000 |
| C | 0.68538200  | -1.52485300 | -1.61294200 |
| B | -0.81926100 | 0.82889400  | 1.04189300  |
| C | -1.43499800 | 2.12958500  | 0.40796100  |
| C | -1.08781000 | 3.41086700  | 0.82688000  |
| C | -2.31634000 | 2.06782000  | -0.67079500 |
| C | -1.57056800 | 4.56234700  | 0.22259400  |
| C | -2.79995300 | 3.19292900  | -1.31509000 |

|   |             |             |             |
|---|-------------|-------------|-------------|
| C | -2.42536500 | 4.45018500  | -0.86209000 |
| C | 0.66539700  | 0.84809600  | 1.53939100  |
| C | 1.12168100  | 0.04526500  | 2.58894300  |
| C | 1.65204800  | 1.60434300  | 0.89510200  |
| C | 2.45847400  | -0.08678800 | 2.91956900  |
| C | 2.99970600  | 1.49776000  | 1.20483200  |
| C | 3.40620600  | 0.62929300  | 2.20226500  |
| C | -1.72439300 | -0.45441300 | 1.21653900  |
| C | -1.22963700 | -1.76430700 | 1.24994600  |
| C | -3.11851300 | -0.36042400 | 1.32786700  |
| C | -2.03980500 | -2.88734000 | 1.33976400  |
| C | -3.95646900 | -1.45790600 | 1.42747400  |
| C | -3.41281900 | -2.73387700 | 1.42232500  |
| F | -2.73429400 | 0.88785500  | -1.13429700 |
| F | -3.61503900 | 3.07944700  | -2.36580700 |
| F | -2.89012000 | 5.54116000  | -1.46211200 |
| F | -1.21299600 | 5.76830700  | 0.66755300  |
| F | -0.24908900 | 3.58352500  | 1.85530700  |
| F | -3.72489000 | 0.83154700  | 1.36357800  |
| F | -5.27626500 | -1.29821300 | 1.53344000  |
| F | -4.20324800 | -3.79697200 | 1.50913000  |
| F | -1.50413700 | -4.10556200 | 1.35050900  |
| F | 0.07541100  | -2.01431100 | 1.20054700  |
| F | 0.25560900  | -0.64955100 | 3.33620100  |
| F | 2.84519800  | -0.89716700 | 3.90767800  |
| F | 4.69899400  | 0.48134300  | 2.47260200  |
| F | 3.89974300  | 2.22220000  | 0.54343600  |
| F | 1.35592300  | 2.48460200  | -0.05397900 |
| O | -1.09054400 | -0.66488400 | -2.92246300 |
| C | -1.47258500 | 0.41353900  | -3.75142300 |
| H | -0.67581400 | 0.65923000  | -4.46602900 |
| H | -2.35324000 | 0.07613500  | -4.30355600 |
| H | -1.71829100 | 1.31418000  | -3.18794000 |
| C | 0.17239100  | -2.88716100 | -1.72644200 |
| C | 1.02998100  | -4.01313800 | -1.79654000 |
| C | -1.21535800 | -3.18299600 | -1.73175000 |
| C | 0.54579500  | -5.31372000 | -1.87625000 |
| H | 2.10414000  | -3.85329200 | -1.79872100 |
| C | -1.69675900 | -4.48404500 | -1.81774500 |
| H | -1.92197500 | -2.36333200 | -1.65771700 |
| C | -0.82560600 | -5.57185100 | -1.88822500 |
| H | 1.25324700  | -6.13796000 | -1.93704200 |
| H | -2.77245100 | -4.64959500 | -1.80693600 |
| H | -1.20290700 | -6.58850400 | -1.94568600 |
| C | 3.05777400  | -0.38214800 | -1.53406600 |
| C | 4.23570000  | -0.60492500 | -0.77273000 |
| C | 5.42876900  | 0.09179900  | -0.99823300 |

|   |            |             |             |
|---|------------|-------------|-------------|
| C | 5.43881500 | 1.02726800  | -2.01949200 |
| C | 4.28255600 | 1.27316000  | -2.78859600 |
| C | 3.10164700 | 0.58529700  | -2.55331700 |
| C | 2.02743100 | -1.28665400 | -1.04410900 |
| C | 2.63427300 | -1.97607000 | -0.01577200 |
| H | 6.30978900 | -0.09946600 | -0.39130800 |
| H | 6.34741400 | 1.58646800  | -2.22475400 |
| H | 4.32056400 | 2.01959900  | -3.57719900 |
| H | 2.20959000 | 0.79731800  | -3.13283100 |
| H | 2.23701900 | -2.76672900 | 0.60518100  |
| N | 3.95007100 | -1.58321900 | 0.14262300  |
| H | 4.59460000 | -1.95772000 | 0.82448700  |

## 10

E (SMD/M06-2X/6-31G(d)) = -3068.80615816

G (SMD/M06-2X/6-31G(d)) = -3068.454672

E (SMD/M06-2X/def2-TZVP//SMD/M06-2X/6-31G(d)) = -3070.10024443

|   |             |             |             |
|---|-------------|-------------|-------------|
| C | -1.13833700 | 0.05301900  | -1.47035900 |
| O | 0.13907900  | -0.23737100 | -1.26772700 |
| C | -2.14426900 | -0.86109500 | -1.50296700 |
| B | 0.99741500  | 0.26206200  | -0.14393200 |
| C | 2.38112700  | 0.92621900  | -0.73948900 |
| C | 3.31096200  | 1.44921200  | 0.15437700  |
| C | 2.80331100  | 0.89592100  | -2.06283000 |
| C | 4.55353100  | 1.93867100  | -0.20985900 |
| C | 4.04419600  | 1.37579900  | -2.47533000 |
| C | 4.92507400  | 1.89919200  | -1.54629600 |
| C | 1.54035600  | -1.07692400 | 0.66916100  |
| C | 1.57006400  | -1.29127100 | 2.04194200  |
| C | 2.08920800  | -2.11330000 | -0.08251400 |
| C | 2.03425900  | -2.46423300 | 2.62734400  |
| C | 2.54925600  | -3.30573200 | 0.45488500  |
| C | 2.51899000  | -3.48522200 | 1.82852800  |
| C | 0.12515400  | 1.28205800  | 0.80699300  |
| C | -0.93799100 | 0.78009400  | 1.55419600  |
| C | 0.28316100  | 2.65933900  | 0.90065100  |
| C | -1.76730200 | 1.55677300  | 2.34812100  |
| C | -0.53162400 | 3.48167900  | 1.67146900  |
| C | -1.56847100 | 2.92753400  | 2.40004400  |
| F | 2.03049000  | 0.39797900  | -3.03954400 |
| F | 4.39466600  | 1.32695400  | -3.76551500 |
| F | 6.11798300  | 2.36032700  | -1.92853000 |
| F | 5.39462900  | 2.43876600  | 0.70141500  |
| F | 3.00045900  | 1.50298300  | 1.46302100  |
| F | 1.25255100  | 3.30098700  | 0.22167400  |
| F | -0.32174600 | 4.80159800  | 1.70992800  |
| F | -2.35913900 | 3.69711600  | 3.14850100  |

|   |             |             |             |
|---|-------------|-------------|-------------|
| F | -2.75735800 | 1.00298700  | 3.05825500  |
| F | -1.19511400 | -0.54005300 | 1.54750500  |
| F | 1.13873100  | -0.35608500 | 2.90532800  |
| F | 2.01891700  | -2.61278200 | 3.95639200  |
| F | 2.96200400  | -4.61996200 | 2.37307100  |
| F | 3.01810900  | -4.27820900 | -0.33578000 |
| F | 2.20048100  | -1.99366300 | -1.41844900 |
| O | -1.44745900 | 1.35975100  | -1.68503600 |
| C | -0.48647700 | 2.12680900  | -2.40174700 |
| H | -0.19567100 | 1.62465800  | -3.32944700 |
| H | -0.98032900 | 3.07197500  | -2.63460500 |
| H | 0.40583300  | 2.32925200  | -1.80358300 |
| C | -1.94785400 | -2.28084600 | -1.12704300 |
| C | -3.00022500 | -3.00399600 | -0.53846400 |
| C | -0.74358000 | -2.96673400 | -1.35783400 |
| C | -2.84338600 | -4.33559600 | -0.16392100 |
| H | -3.95103000 | -2.50921100 | -0.36123800 |
| C | -0.58420300 | -4.29580400 | -0.97543800 |
| H | 0.07220600  | -2.44782500 | -1.84268800 |
| C | -1.63064900 | -4.99095300 | -0.37170600 |
| H | -3.67440000 | -4.86143300 | 0.29855000  |
| H | 0.36924400  | -4.78735600 | -1.15624700 |
| H | -1.50597300 | -6.02777400 | -0.07333100 |
| C | -4.47882400 | 0.12304000  | -0.87352800 |
| C | -5.64599700 | 0.46974800  | -1.59589900 |
| C | -6.77198700 | 1.01427800  | -0.96519000 |
| C | -6.70642900 | 1.20245200  | 0.40679500  |
| C | -5.55576300 | 0.85050700  | 1.14523700  |
| C | -4.44750800 | 0.30866300  | 0.51638500  |
| C | -3.51794800 | -0.39160400 | -1.81611500 |
| C | -4.13489000 | -0.34553300 | -3.03909900 |
| H | -7.66068100 | 1.27865700  | -1.53097200 |
| H | -7.56167100 | 1.62592400  | 0.92539000  |
| H | -5.54231600 | 1.00667900  | 2.21998300  |
| H | -3.56676900 | 0.01145800  | 1.07763800  |
| H | -3.75847500 | -0.63684000 | -4.01052300 |
| N | -5.40654600 | 0.16975300  | -2.91414500 |
| H | -6.05476200 | 0.31074400  | -3.67662100 |

## 11

E (SMD/M06-2X/6-31G(d)) = -3298.44170559

G (SMD/M06-2X/6-31G(d)) = -3298.010070

E (SMD/M06-2X/def2-TZVP//SMD/M06-2X/6-31G(d)) = -3299.86578978

|   |             |             |             |
|---|-------------|-------------|-------------|
| C | -1.15492300 | 0.53662800  | -0.98307100 |
| O | 0.05829200  | -0.03645800 | -0.97237200 |
| C | -2.24723000 | -0.05962400 | -1.48990900 |
| B | 1.02130900  | 0.01754500  | 0.19965900  |

|   |             |             |             |
|---|-------------|-------------|-------------|
| C | 1.69029900  | -1.47232500 | 0.40278700  |
| C | 2.57401200  | -1.65166700 | 1.46352500  |
| C | 1.44379200  | -2.61587000 | -0.34414600 |
| C | 3.16474700  | -2.86257100 | 1.78630100  |
| C | 2.01155200  | -3.85312700 | -0.05726200 |
| C | 2.87599000  | -3.97940700 | 1.01598600  |
| C | 0.21178700  | 0.27765000  | 1.60485400  |
| C | 0.56825300  | 1.13302000  | 2.64235100  |
| C | -0.89930900 | -0.52168000 | 1.87739800  |
| C | -0.17734500 | 1.27547600  | 3.80750800  |
| C | -1.66949000 | -0.41612000 | 3.02701800  |
| C | -1.31315100 | 0.50618900  | 3.99787700  |
| C | 2.19497900  | 1.12032000  | -0.19625800 |
| C | 2.05894300  | 2.50027400  | -0.04853000 |
| C | 3.38060400  | 0.75476600  | -0.83562700 |
| C | 3.00219100  | 3.42851600  | -0.46849000 |
| C | 4.36137300  | 1.64412700  | -1.25676500 |
| C | 4.17157300  | 3.00148900  | -1.07368000 |
| F | 0.65331100  | -2.58153900 | -1.43080600 |
| F | 1.73609900  | -4.91765600 | -0.81597000 |
| F | 3.43117400  | -5.15734000 | 1.30245400  |
| F | 4.00433400  | -2.96528100 | 2.81980700  |
| F | 2.90070300  | -0.59683500 | 2.23295500  |
| F | 3.64149500  | -0.53558400 | -1.14451800 |
| F | 5.46201400  | 1.19995800  | -1.86543600 |
| F | 5.08030200  | 3.87936200  | -1.49016800 |
| F | 2.76382300  | 4.73659000  | -0.32492700 |
| F | 0.95730000  | 3.04069700  | 0.50026000  |
| F | 1.69415200  | 1.85894600  | 2.59106400  |
| F | 0.20744200  | 2.13253400  | 4.75701900  |
| F | -2.03402500 | 0.62900000  | 5.11138100  |
| F | -2.73793700 | -1.19948400 | 3.20778600  |
| F | -1.27110500 | -1.47797000 | 1.00814400  |
| O | -1.10744600 | 1.82143900  | -0.50918100 |
| C | -2.07669100 | 2.32333700  | 0.41468300  |
| H | -1.54350000 | 3.03213500  | 1.05200500  |
| H | -2.88741400 | 2.82841000  | -0.11475600 |
| H | -2.48194200 | 1.50933800  | 1.01866800  |
| C | -2.14365600 | -1.44008800 | -2.05269100 |
| C | -2.74566700 | -2.53406800 | -1.42259000 |
| C | -1.47536500 | -1.64803900 | -3.26402300 |
| C | -2.65622300 | -3.80855600 | -1.97745800 |
| H | -3.27921200 | -2.38578000 | -0.48817100 |
| C | -1.38232800 | -2.92161600 | -3.82016600 |
| H | -1.02611500 | -0.79937800 | -3.77450900 |
| C | -1.97000800 | -4.00750100 | -3.17476200 |
| H | -3.12115700 | -4.64968000 | -1.47120800 |
| H | -0.85227900 | -3.06458600 | -4.75760300 |

|   |             |             |             |
|---|-------------|-------------|-------------|
| H | -1.89843900 | -5.00271600 | -3.60354700 |
| C | -4.61118200 | 0.49172300  | -0.54909700 |
| C | -5.71733100 | 1.24187600  | -1.01374400 |
| C | -6.89905800 | 1.35990100  | -0.27116600 |
| C | -6.94824400 | 0.71610500  | 0.95478800  |
| C | -5.85006700 | -0.02510200 | 1.44199700  |
| C | -4.68525200 | -0.14102400 | 0.70273300  |
| C | -3.56999000 | 0.60570200  | -1.53997000 |
| C | -4.08150900 | 1.39233800  | -2.54061800 |
| H | -7.74005200 | 1.93814900  | -0.64219900 |
| H | -7.84941900 | 0.78753300  | 1.55639200  |
| H | -5.92119500 | -0.50697800 | 2.41263400  |
| H | -3.83375600 | -0.70187700 | 1.08093000  |
| H | -3.62389500 | 1.71103000  | -3.46755000 |
| N | -5.36260700 | 1.77867500  | -2.22795100 |
| H | -5.95564700 | 2.35369600  | -2.81131600 |
| H | -0.31230000 | 2.91085200  | -1.53992000 |
| O | 0.18893400  | 3.41900400  | -2.22780100 |
| H | 0.57331400  | 4.18770000  | -1.77026600 |
| H | 1.17327200  | 2.60062400  | -2.83560700 |
| O | 1.91317400  | 2.01275200  | -3.32805100 |
| H | 1.91035900  | 2.24354600  | -4.27886900 |
| H | 1.76492100  | 0.93790800  | -3.22297100 |
| O | 1.57603400  | -0.41291000 | -3.11584800 |
| H | 2.38325900  | -0.86565900 | -2.80901500 |
| H | 0.90279700  | -0.54820600 | -2.39985500 |

#### TS<sub>11-12</sub>

E (SMD/M06-2X/6-31G(d)) = -3298.41797374

G (SMD/M06-2X/6-31G(d)) = -3297.988212

E (SMD/M06-2X/def2-TZVP//SMD/M06-2X/6-31G(d)) = -3299.8428948

|   |             |             |             |
|---|-------------|-------------|-------------|
| C | -1.08557100 | 0.12901800  | -1.32417400 |
| O | 0.11445000  | -0.29495000 | -1.07132500 |
| C | -2.18325700 | -0.72627800 | -1.55306300 |
| B | 1.01020200  | 0.18638000  | 0.11277700  |
| C | 2.38828100  | -0.69736800 | 0.06831400  |
| C | 3.40890700  | -0.34392500 | 0.94963600  |
| C | 2.62025200  | -1.87175600 | -0.63588800 |
| C | 4.58463400  | -1.05861600 | 1.10364500  |
| C | 3.78572800  | -2.62201700 | -0.51608900 |
| C | 4.77533800  | -2.21445000 | 0.35981800  |
| C | 0.28497000  | -0.26563700 | 1.51546600  |
| C | 0.19232300  | 0.46458500  | 2.69803200  |
| C | -0.21883900 | -1.56486800 | 1.60105700  |
| C | -0.48422400 | 0.00874100  | 3.82364300  |
| C | -0.90956300 | -2.05683600 | 2.69957000  |
| C | -1.05559400 | -1.25318900 | 3.81908100  |



|   |             |             |             |
|---|-------------|-------------|-------------|
| C | 1.27247700  | 1.79784400  | -0.04455800 |
| C | 0.38341100  | 2.76745300  | 0.41939700  |
| C | 2.36343900  | 2.31789000  | -0.73209300 |
| C | 0.58385100  | 4.13320700  | 0.27678800  |
| C | 2.60151100  | 3.67375400  | -0.91528000 |
| C | 1.70641500  | 4.59279300  | -0.39542400 |
| F | 1.71350300  | -2.35645700 | -1.50590500 |
| F | 3.94891400  | -3.73550200 | -1.23375100 |
| F | 5.89660300  | -2.92169700 | 0.49017500  |
| F | 5.52468700  | -0.65651000 | 1.96112600  |
| F | 3.26430800  | 0.75154800  | 1.71499900  |
| F | 3.26940200  | 1.49825600  | -1.31308700 |
| F | 3.67525500  | 4.09206100  | -1.58757600 |
| F | 1.91242000  | 5.89800100  | -0.55100200 |
| F | -0.30192000 | 5.00556900  | 0.76016900  |
| F | -0.76417200 | 2.41441200  | 1.01376300  |
| F | 0.77864300  | 1.66334600  | 2.82849000  |
| F | -0.56827900 | 0.77003700  | 4.91789800  |
| F | -1.70213600 | -1.70337300 | 4.89288300  |
| F | -1.39284800 | -3.30138500 | 2.70522600  |
| F | -0.00066400 | -2.42709900 | 0.60164600  |
| O | -1.29597100 | 1.43341000  | -1.50990900 |
| C | -0.50676900 | 2.09204700  | -2.52202000 |
| H | -1.11040300 | 2.15394400  | -3.43166500 |
| H | -0.28237100 | 3.09698200  | -2.16521300 |
| H | 0.41794600  | 1.54772500  | -2.71716600 |
| C | -2.02702600 | -2.20097900 | -1.33588300 |
| C | -2.79602700 | -2.87173000 | -0.38055100 |
| C | -1.11581200 | -2.92838200 | -2.10593200 |
| C | -2.63189400 | -4.23934500 | -0.17860600 |
| H | -3.51430800 | -2.31448900 | 0.21580100  |
| C | -0.95158600 | -4.29553500 | -1.90634300 |
| H | -0.52177100 | -2.41720800 | -2.86119900 |
| C | -1.70803100 | -4.95476100 | -0.93900600 |
| H | -3.22353200 | -4.74616700 | 0.57825100  |
| H | -0.23341500 | -4.84611900 | -2.50710000 |
| H | -1.58067500 | -6.02155900 | -0.78063600 |
| C | -4.01115500 | 0.52334400  | -0.17377000 |
| C | -5.37707300 | 0.82800400  | -0.37769000 |
| C | -6.14657300 | 1.47543300  | 0.59711800  |
| C | -5.51983500 | 1.79906800  | 1.78926500  |
| C | -4.16240800 | 1.48558200  | 2.01798700  |
| C | -3.40460100 | 0.85121300  | 1.04910800  |
| C | -3.54114200 | -0.13576500 | -1.36518600 |
| C | -4.62021700 | -0.22068500 | -2.21013500 |
| H | -7.19343000 | 1.70629000  | 0.42458000  |
| H | -6.08666500 | 2.30030900  | 2.56807800  |

|   |             |             |             |
|---|-------------|-------------|-------------|
| H | -3.70890000 | 1.74714300  | 2.96959700  |
| H | -2.35965300 | 0.60686000  | 1.22729600  |
| H | -4.70381000 | -0.67696500 | -3.18818700 |
| N | -5.71548700 | 0.36380000  | -1.62662700 |
| H | -6.63315100 | 0.42518000  | -2.04725000 |
| H | -2.05765600 | -0.54109300 | -2.94211400 |
| O | -2.14361600 | -0.40635200 | -4.17662600 |
| H | -2.72061300 | 0.36231900  | -4.35233000 |
| H | -1.21777300 | -0.20010500 | -4.59412800 |
| O | 0.11254300  | 0.18350800  | -5.17531600 |
| H | 0.34068000  | -0.36823700 | -5.94239600 |
| H | 0.86468100  | 0.08684400  | -4.53572900 |
| O | 1.98669200  | -0.23499200 | -3.31016200 |
| H | 2.52292000  | 0.44366700  | -2.86778700 |
| H | 1.51703100  | -0.69678600 | -2.59436700 |

## 12

E (SMD/M06-2X/6-31G(d)) = -861.72755854

G (SMD/M06-2X/6-31G(d)) = -861.487880

E (SMD/M06-2X/def2-TZVP//SMD/M06-2X/6-31G(d)) = -862.056548326

|   |             |             |             |
|---|-------------|-------------|-------------|
| C | -0.76190500 | 1.83162800  | -0.26809900 |
| O | -0.99330400 | 1.68843600  | -1.44587100 |
| C | -0.79562300 | 0.72855800  | 0.78785900  |
| O | -0.38421700 | 2.99626300  | 0.27026300  |
| C | -0.22378000 | 4.07496300  | -0.65658300 |
| H | -1.16748700 | 4.28454500  | -1.16515800 |
| H | 0.08507800  | 4.93352900  | -0.06180500 |
| H | 0.54122800  | 3.82920700  | -1.39656000 |
| C | -1.80143700 | -0.35679800 | 0.42450600  |
| C | -1.49456600 | -1.71351300 | 0.52656600  |
| C | -3.09429600 | 0.01132600  | 0.03313000  |
| C | -2.45552200 | -2.68350100 | 0.23770500  |
| H | -0.49937300 | -2.01865600 | 0.83486700  |
| C | -4.05397300 | -0.95289700 | -0.25427300 |
| H | -3.35131800 | 1.06483900  | -0.04935700 |
| C | -3.73614500 | -2.30786600 | -0.15486400 |
| H | -2.19669600 | -3.73507300 | 0.32055200  |
| H | -5.05107100 | -0.64723500 | -0.55754500 |
| H | -4.48332400 | -3.06254800 | -0.38149900 |
| C | 1.48879200  | -0.32624600 | -0.01343400 |
| C | 2.72898100  | -0.57941600 | 0.62321000  |
| C | 3.81124800  | -1.15671000 | -0.05188100 |
| C | 3.62845000  | -1.48154900 | -1.38549800 |
| C | 2.40048000  | -1.24157400 | -2.03810600 |
| C | 1.33183000  | -0.67018900 | -1.36839200 |
| C | 0.62163700  | 0.25643700  | 0.98019300  |
| C | 1.35265300  | 0.33462600  | 2.13601800  |

|   |             |             |             |
|---|-------------|-------------|-------------|
| H | 4.75351300  | -1.34201500 | 0.45502900  |
| H | 4.44635700  | -1.93136600 | -1.94035300 |
| H | 2.29578700  | -1.51205300 | -3.08450400 |
| H | 0.38789600  | -0.48428100 | -1.87270200 |
| H | 1.06442500  | 0.71630300  | 3.10634300  |
| N | 2.61297000  | -0.16536600 | 1.92816800  |
| H | 3.33944800  | -0.22236000 | 2.62912100  |
| H | -1.11602100 | 1.20345200  | 1.72291300  |

**13**

E (SMD/M06-2X/6-31G(d)) = -723.906115802

G (SMD/M06-2X/6-31G(d)) = -723.738866

E (SMD/M06-2X/def2-TZVP//SMD/M06-2X/6-31G(d)) = -724.179841016

|   |             |             |             |
|---|-------------|-------------|-------------|
| C | -0.50850900 | -0.78563500 | -0.11667000 |
| C | 0.51632700  | 0.26611100  | -0.08342800 |
| O | -0.19420500 | -1.95838300 | -0.25975000 |
| N | 0.10203300  | 1.50346600  | -0.26692700 |
| N | -0.21681900 | 2.57057200  | -0.43687000 |
| C | -1.95304600 | -0.40060900 | 0.00346200  |
| C | -2.87746400 | -1.10523400 | -0.77356200 |
| C | -4.23367900 | -0.81508900 | -0.67815500 |
| C | -4.67553000 | 0.16374200  | 0.21218700  |
| C | -3.75974000 | 0.84937600  | 1.00782400  |
| C | -2.39904800 | 0.57267600  | 0.90263800  |
| H | -2.51965400 | -1.87415000 | -1.45154400 |
| H | -4.94738900 | -1.35415100 | -1.29343300 |
| H | -5.73530900 | 0.38670000  | 0.29105600  |
| H | -4.10411800 | 1.59684700  | 1.71560900  |
| H | -1.69372200 | 1.09408200  | 1.54479600  |
| C | 1.97882100  | 0.06448700  | -0.01194400 |
| C | 2.86177000  | 1.06786000  | -0.43671300 |
| C | 4.23729900  | 0.88613600  | -0.34446800 |
| C | 4.75788600  | -0.30071900 | 0.16666000  |
| C | 3.88542100  | -1.30128700 | 0.58908600  |
| C | 2.50733000  | -1.12653400 | 0.50658000  |
| H | 2.47838600  | 1.99793100  | -0.84845800 |
| H | 4.90230100  | 1.67617000  | -0.68011900 |
| H | 5.83175100  | -0.44403100 | 0.23490900  |
| H | 4.27730200  | -2.23010600 | 0.99292500  |
| H | 1.84056300  | -1.91217700 | 0.83786400  |

**TS<sub>13-14</sub>**

E (SMD/M06-2X/6-31G(d)) = -2931.41699392

G (SMD/M06-2X/6-31G(d)) = -2931.126074

E (SMD/M06-2X/def2-TZVP//SMD/M06-2X/6-31G(d)) = -2932.64796929

|   |            |             |            |
|---|------------|-------------|------------|
| C | 1.05335900 | -1.86147600 | 1.44385900 |
| O | 0.64587100 | -2.84107800 | 0.85481000 |

|   |             |             |             |
|---|-------------|-------------|-------------|
| C | 0.07812600  | -0.75689700 | 1.80584000  |
| N | 0.63545000  | 0.07435500  | 2.75950700  |
| N | 1.03352700  | 0.75371800  | 3.53782600  |
| B | -0.19177800 | 0.23624300  | -0.20720200 |
| C | 1.26450700  | 0.64890800  | -0.77952400 |
| C | 1.40029500  | 0.72473700  | -2.16853600 |
| C | 2.37898900  | 1.08486800  | -0.07525500 |
| C | 2.55748200  | 1.12919200  | -2.81181400 |
| C | 3.56757200  | 1.48074000  | -0.67767200 |
| C | 3.65920100  | 1.50587700  | -2.05705600 |
| C | -1.09000100 | 1.57260000  | -0.05556900 |
| C | -2.03510000 | 1.90779200  | -1.03037200 |
| C | -0.84798500 | 2.58627900  | 0.86452100  |
| C | -2.72485400 | 3.11200200  | -1.04814800 |
| C | -1.52206100 | 3.79743600  | 0.89506000  |
| C | -2.47451600 | 4.06411500  | -0.07379000 |
| C | -0.91123200 | -1.04392600 | -0.84221100 |
| C | -2.28019800 | -1.28885700 | -0.69441300 |
| C | -0.23431100 | -2.02712800 | -1.56781500 |
| C | -2.92401000 | -2.40687600 | -1.20057000 |
| C | -0.84205100 | -3.15141900 | -2.10355800 |
| C | -2.19993700 | -3.34744100 | -1.91423800 |
| F | 2.38219400  | 1.11350500  | 1.26596400  |
| F | 4.61289700  | 1.83238200  | 0.07053200  |
| F | 4.78348300  | 1.89030800  | -2.65376400 |
| F | 2.61891800  | 1.16465100  | -4.14277700 |
| F | 0.36909000  | 0.38839700  | -2.95705300 |
| F | 1.08726500  | -1.94356100 | -1.77140200 |
| F | -0.12655800 | -4.05001300 | -2.78176300 |
| F | -2.79844300 | -4.42764100 | -2.40428600 |
| F | -4.22803200 | -2.58827600 | -0.98526300 |
| F | -3.06161500 | -0.43788100 | -0.02163500 |
| F | -2.31555300 | 1.07428300  | -2.03929100 |
| F | -3.61832500 | 3.36137500  | -2.00510100 |
| F | -3.13066300 | 5.21956400  | -0.07540100 |
| F | -1.24710600 | 4.70239500  | 1.83397000  |
| F | 0.09024400  | 2.41738900  | 1.81146600  |
| C | -1.34408600 | -1.04873100 | 2.24223300  |
| C | -1.92715200 | -2.30784000 | 2.07104600  |
| C | -2.10459800 | -0.01427800 | 2.80295800  |
| C | -3.25767900 | -2.51031900 | 2.43469300  |
| H | -1.36066300 | -3.11901800 | 1.63415100  |
| C | -3.42456600 | -0.23056700 | 3.17846600  |
| H | -1.67355500 | 0.97348500  | 2.94697400  |
| C | -4.01117100 | -1.47961200 | 2.98698300  |
| H | -3.70149100 | -3.48965800 | 2.28226700  |
| H | -3.99582400 | 0.58467500  | 3.61123200  |

|   |             |             |             |
|---|-------------|-------------|-------------|
| H | -5.04654800 | -1.64665800 | 3.26684400  |
| C | 2.52139700  | -1.70561500 | 1.71472400  |
| C | 3.04051100  | -1.54718700 | 3.00260000  |
| C | 3.38469300  | -1.80228100 | 0.61871900  |
| C | 4.41683300  | -1.44278500 | 3.18447600  |
| H | 2.38450300  | -1.53712200 | 3.86853000  |
| C | 4.75699600  | -1.66997800 | 0.80431200  |
| H | 2.97116300  | -1.96031700 | -0.37262200 |
| C | 5.27306900  | -1.48386400 | 2.08602600  |
| H | 4.81832600  | -1.32850400 | 4.18630400  |
| H | 5.42342100  | -1.71866400 | -0.05140400 |
| H | 6.34444600  | -1.38403700 | 2.23031200  |

#### 14

E (SMD/M06-2X/6-31G(d)) = -2931.41935724

G (SMD/M06-2X/6-31G(d)) = -2931.126979

E (SMD/M06-2X/def2-TZVP//SMD/M06-2X/6-31G(d)) = -2932.65071133

|   |             |             |             |
|---|-------------|-------------|-------------|
| C | 1.00099700  | -2.00360800 | 1.25020400  |
| O | 0.51664900  | -2.93279200 | 0.65198900  |
| C | 0.07849100  | -0.79609000 | 1.60138300  |
| N | 0.74425900  | -0.07974200 | 2.64293000  |
| N | 1.20959000  | 0.45310300  | 3.48598200  |
| B | -0.16546400 | 0.14408000  | -0.00376900 |
| C | 1.24709700  | 0.59064500  | -0.71329400 |
| C | 1.24998000  | 0.82456800  | -2.09173000 |
| C | 2.44072200  | 0.93300300  | -0.09179200 |
| C | 2.34900100  | 1.27541700  | -2.80345400 |
| C | 3.57630900  | 1.37256100  | -0.76292400 |
| C | 3.53280900  | 1.54698500  | -2.13300700 |
| C | -0.98899500 | 1.56174700  | 0.14226400  |
| C | -1.94406200 | 1.99010200  | -0.78551000 |
| C | -0.61721900 | 2.55705000  | 1.04097200  |
| C | -2.52831900 | 3.25105200  | -0.76454300 |
| C | -1.17441700 | 3.82424900  | 1.10753200  |
| C | -2.15057700 | 4.17712800  | 0.19186400  |
| C | -1.00068100 | -1.00240200 | -0.81668600 |
| C | -2.37573800 | -1.18162600 | -0.66291200 |
| C | -0.40941500 | -1.91637100 | -1.68674000 |
| C | -3.10530800 | -2.17654900 | -1.29689000 |
| C | -1.09850600 | -2.92052600 | -2.34962400 |
| C | -2.46219200 | -3.05552100 | -2.15172100 |
| F | 2.57835300  | 0.83548400  | 1.24312600  |
| F | 4.69679700  | 1.62998100  | -0.08695300 |
| F | 4.60292900  | 1.97428700  | -2.79824600 |
| F | 2.27622700  | 1.45729300  | -4.12270600 |
| F | 0.13740600  | 0.60898100  | -2.80913700 |
| F | 0.91441900  | -1.88891500 | -1.91274000 |

|   |             |             |             |
|---|-------------|-------------|-------------|
| F | -0.45474200 | -3.76281900 | -3.16131900 |
| F | -3.14261400 | -4.01834500 | -2.76905300 |
| F | -4.41845800 | -2.29128700 | -1.08366100 |
| F | -3.08816900 | -0.37048100 | 0.13122700  |
| F | -2.35259100 | 1.20910700  | -1.79316800 |
| F | -3.44446300 | 3.57861500  | -1.67677100 |
| F | -2.70387100 | 5.38612700  | 0.22149500  |
| F | -0.76376500 | 4.69943100  | 2.02619900  |
| F | 0.36622200  | 2.31323800  | 1.92993800  |
| C | -1.29557800 | -1.10670400 | 2.22125900  |
| C | -1.91283200 | -2.35123900 | 2.08181400  |
| C | -1.96301100 | -0.08155500 | 2.90117500  |
| C | -3.19106700 | -2.54992900 | 2.60170900  |
| H | -1.42396000 | -3.15639900 | 1.55107000  |
| C | -3.23134000 | -0.29278200 | 3.42803000  |
| H | -1.50059900 | 0.89459600  | 3.02558000  |
| C | -3.85483400 | -1.52848900 | 3.27300100  |
| H | -3.66498300 | -3.51852300 | 2.47566500  |
| H | -3.73229700 | 0.51516500  | 3.95157400  |
| H | -4.85026600 | -1.69264400 | 3.67345300  |
| C | 2.47238700  | -1.96540800 | 1.53074400  |
| C | 2.99693800  | -1.93356300 | 2.82564800  |
| C | 3.32601700  | -2.03661000 | 0.42515600  |
| C | 4.37705100  | -1.93040300 | 3.00775500  |
| H | 2.34108300  | -1.94505200 | 3.69207200  |
| C | 4.70346500  | -2.00444100 | 0.61510600  |
| H | 2.90358500  | -2.09401800 | -0.57352200 |
| C | 5.22888600  | -1.94544000 | 1.90513700  |
| H | 4.78488700  | -1.91491300 | 4.01333600  |
| H | 5.36601300  | -2.03333500 | -0.24431500 |
| H | 6.30424900  | -1.92423700 | 2.05200100  |

#### TS<sub>14</sub>

E (SMD/M06-2X/6-31G(d)) = -2931.40859154

G (SMD/M06-2X/6-31G(d)) = -2931.118591

E (SMD/M06-2X/def2-TZVP//SMD/M06-2X/6-31G(d)) = -2932.64054977

|   |             |             |             |
|---|-------------|-------------|-------------|
| C | 0.95024500  | -2.10293500 | 1.06099700  |
| O | 0.47235900  | -3.01469100 | 0.42251100  |
| C | -0.00207100 | -0.92622000 | 1.37041400  |
| N | 0.92397100  | -0.15515800 | 2.78694600  |
| N | 1.23808700  | 0.31507200  | 3.72662000  |
| B | -0.17149200 | 0.13166700  | 0.02077400  |
| C | 1.22403100  | 0.63036300  | -0.69333300 |
| C | 1.18547300  | 0.98712900  | -2.04393400 |
| C | 2.43725000  | 0.91238100  | -0.07782500 |
| C | 2.26290600  | 1.49869700  | -2.74703900 |
| C | 3.55182400  | 1.41224300  | -0.74342000 |

|   |             |             |             |
|---|-------------|-------------|-------------|
| C | 3.46678800  | 1.70949600  | -2.09030300 |
| C | -0.99436300 | 1.54503700  | 0.22613400  |
| C | -1.98767000 | 2.02040100  | -0.63347600 |
| C | -0.55351900 | 2.50107100  | 1.13817200  |
| C | -2.54528100 | 3.29102800  | -0.53692000 |
| C | -1.07942700 | 3.77522300  | 1.27626800  |
| C | -2.09677700 | 4.17648000  | 0.42658800  |
| C | -1.02154900 | -0.96712200 | -0.88230700 |
| C | -2.39031700 | -1.17662400 | -0.71330100 |
| C | -0.43776800 | -1.79288300 | -1.84166800 |
| C | -3.12659200 | -2.10760400 | -1.43121700 |
| C | -1.13468100 | -2.73021400 | -2.58819500 |
| C | -2.49427100 | -2.89227700 | -2.38066100 |
| F | 2.61846100  | 0.69730300  | 1.23652900  |
| F | 4.69337100  | 1.61298100  | -0.08266300 |
| F | 4.51711700  | 2.19707400  | -2.74642700 |
| F | 2.15125200  | 1.79752500  | -4.04244800 |
| F | 0.04797000  | 0.83652200  | -2.74002400 |
| F | 0.88256000  | -1.74115500 | -2.07859400 |
| F | -0.50247100 | -3.48593500 | -3.48842800 |
| F | -3.18182500 | -3.79044800 | -3.08073800 |
| F | -4.43690800 | -2.24509300 | -1.21711400 |
| F | -3.08889700 | -0.44962400 | 0.16900300  |
| F | -2.46423400 | 1.28436600  | -1.64555300 |
| F | -3.50318000 | 3.66724500  | -1.38568900 |
| F | -2.62245700 | 5.39444600  | 0.52616900  |
| F | -0.60449700 | 4.61217000  | 2.19990900  |
| F | 0.46567300  | 2.20021800  | 1.96601200  |
| C | -1.23941100 | -1.23965000 | 2.16237200  |
| C | -1.91288500 | -0.19837800 | 2.82045700  |
| C | -1.77346500 | -2.53336200 | 2.20702100  |
| C | -3.09294400 | -0.44381100 | 3.50539800  |
| H | -1.49724600 | 0.80401600  | 2.82249400  |
| C | -2.97720000 | -2.76500400 | 2.86867700  |
| H | -1.28296800 | -3.35192100 | 1.69728600  |
| C | -3.63720000 | -1.72832200 | 3.51986200  |
| H | -3.59254000 | 0.37008100  | 4.02049200  |
| H | -3.39211800 | -3.76774900 | 2.87642300  |
| H | -4.57017000 | -1.91828300 | 4.04129700  |
| C | 2.41801200  | -2.09641600 | 1.36301200  |
| C | 2.93594800  | -2.17797700 | 2.65709800  |
| C | 3.27654400  | -2.10466500 | 0.25847700  |
| C | 4.31469200  | -2.22052800 | 2.84461400  |
| H | 2.27360400  | -2.23637300 | 3.51562300  |
| C | 4.65330800  | -2.11785700 | 0.45544900  |
| H | 2.85989400  | -2.07756700 | -0.74398300 |
| C | 5.17283900  | -2.17033200 | 1.74806400  |

|   |            |             |             |
|---|------------|-------------|-------------|
| H | 4.71659600 | -2.29269800 | 3.85015200  |
| H | 5.31935200 | -2.09653100 | -0.40150800 |
| H | 6.24755400 | -2.18576700 | 1.90045200  |

**15**

E (SMD/M06-2X/6-31G(d)) = -2931.46389705

G (SMD/M06-2X/6-31G(d)) = -2931.176424

E (SMD/M06-2X/def2-TZVP//SMD/M06-2X/6-31G(d)) = -2932.70168328

|   |             |             |             |
|---|-------------|-------------|-------------|
| C | 1.69060700  | -0.82427900 | 0.40187200  |
| C | 2.47930500  | -1.98904300 | 0.37399500  |
| O | 0.42935200  | -0.98385700 | 0.27057900  |
| N | 1.74494800  | -3.09244900 | 0.11525300  |
| N | 1.10649200  | -3.97772000 | -0.10029300 |
| B | -0.72102500 | -0.01065700 | -0.06347900 |
| C | -1.81432000 | -0.97819300 | -0.80913100 |
| C | -2.56529100 | -0.63338900 | -1.92725100 |
| C | -2.11318400 | -2.22642300 | -0.26667600 |
| C | -3.52117400 | -1.46891100 | -2.49233900 |
| C | -3.05497600 | -3.09306300 | -0.80214600 |
| C | -3.76612800 | -2.70955200 | -1.92827100 |
| C | -0.10992200 | 1.15524200  | -1.02261600 |
| C | 0.05659500  | 2.49220900  | -0.68481800 |
| C | 0.42413300  | 0.79404300  | -2.25624700 |
| C | 0.71753600  | 3.40697600  | -1.49670700 |
| C | 1.07605900  | 1.67374400  | -3.10510200 |
| C | 1.22589500  | 2.99713500  | -2.71742200 |
| C | -1.44809800 | 0.48124100  | 1.30861800  |
| C | -1.20841500 | -0.00247600 | 2.58673100  |
| C | -2.53317600 | 1.34637200  | 1.20190200  |
| C | -1.96230000 | 0.36906100  | 3.69551700  |
| C | -3.31206400 | 1.74293300  | 2.27498200  |
| C | -3.02356100 | 1.24288300  | 3.53799600  |
| F | -1.48869500 | -2.64830300 | 0.84736300  |
| F | -3.29076800 | -4.28022900 | -0.23804500 |
| F | -4.67829600 | -3.52319000 | -2.45825900 |
| F | -4.20466500 | -1.08483800 | -3.57310500 |
| F | -2.39743500 | 0.55082800  | -2.53500800 |
| F | -2.85343900 | 1.83947800  | -0.00594900 |
| F | -4.33459900 | 2.58454100  | 2.11073600  |
| F | -3.75843500 | 1.60731400  | 4.58772400  |
| F | -1.67284200 | -0.11603000 | 4.90530800  |
| F | -0.18798100 | -0.84583900 | 2.83086900  |
| F | -0.37738900 | 2.96925800  | 0.49091800  |
| F | 0.88359900  | 4.66975300  | -1.09768700 |
| F | 1.86671600  | 3.85968800  | -3.50416600 |
| F | 1.57190300  | 1.26112300  | -4.27405100 |
| F | 0.34713000  | -0.48582900 | -2.66205300 |



|   |            |             |             |
|---|------------|-------------|-------------|
| C | 3.92784700 | -2.17938000 | 0.61532400  |
| C | 4.67215200 | -3.01375500 | -0.22429500 |
| C | 4.54878700 | -1.53626300 | 1.69137800  |
| C | 6.03059800 | -3.20236900 | 0.01180600  |
| H | 4.19085600 | -3.50878700 | -1.06401200 |
| C | 5.91118500 | -1.71346800 | 1.90780600  |
| H | 3.96516500 | -0.90459100 | 2.35424900  |
| C | 6.65301600 | -2.54794100 | 1.07264900  |
| H | 6.60332500 | -3.85334200 | -0.64110100 |
| H | 6.39067000 | -1.20874100 | 2.74050300  |
| H | 7.71434000 | -2.69010200 | 1.25095500  |
| C | 2.32259000 | 0.50237300  | 0.57718300  |
| C | 3.28768600 | 0.93119200  | -0.34082800 |
| C | 1.91899700 | 1.33013500  | 1.62789000  |
| C | 3.81402100 | 2.21302400  | -0.22736100 |
| H | 3.59857600 | 0.27432600  | -1.14863200 |
| C | 2.47178900 | 2.60140600  | 1.74750900  |
| H | 1.19388700 | 0.97378200  | 2.35103900  |
| C | 3.40481500 | 3.04807400  | 0.81367500  |
| H | 4.54283400 | 2.56162100  | -0.95219700 |
| H | 2.16250100 | 3.24635800  | 2.56357400  |
| H | 3.81880600 | 4.04803600  | 0.89856400  |

#### TS<sub>15-16</sub>

E (SMD/M06-2X/6-31G(d)) = -2931.4287877

G (SMD/M06-2X/6-31G(d)) = -2931.145119

E (SMD/M06-2X/def2-TZVP//SMD/M06-2X/6-31G(d)) = -2932.6677477

|   |             |             |             |
|---|-------------|-------------|-------------|
| C | 1.77050300  | -0.33610200 | -0.69575100 |
| C | 2.74696100  | -1.15113900 | -1.07339000 |
| O | 0.50160900  | -0.51391800 | -0.95304100 |
| N | 1.68618400  | -2.61511000 | -1.83596200 |
| N | 1.27355000  | -3.56039000 | -2.21030700 |
| B | -0.67602900 | 0.02987900  | -0.16014100 |
| C | -1.98291500 | -0.52974500 | -0.98487600 |
| C | -3.10998300 | 0.19818400  | -1.34905500 |
| C | -2.04862300 | -1.88795700 | -1.28904500 |
| C | -4.20305600 | -0.35928300 | -2.00258600 |
| C | -3.11600500 | -2.48522200 | -1.94309200 |
| C | -4.20586000 | -1.70998200 | -2.30613000 |
| C | -0.56378200 | 1.66312200  | -0.12470600 |
| C | -0.30924100 | 2.45143700  | 0.99059500  |
| C | -0.59087100 | 2.35903900  | -1.33016100 |
| C | -0.08504200 | 3.82220300  | 0.92534900  |
| C | -0.38352600 | 3.72412800  | -1.44301500 |
| C | -0.12167500 | 4.46435700  | -0.29949600 |
| C | -0.79856900 | -0.67925300 | 1.31475200  |
| C | -0.05814300 | -1.75241200 | 1.78762800  |

|   |             |             |             |
|---|-------------|-------------|-------------|
| C | -1.85674400 | -0.29886500 | 2.13624900  |
| C | -0.30972500 | -2.38118400 | 3.00329800  |
| C | -2.14912300 | -0.89387100 | 3.35106200  |
| C | -1.36404200 | -1.95199000 | 3.78912500  |
| F | -1.05033900 | -2.71128600 | -0.92017000 |
| F | -3.11065000 | -3.79424200 | -2.20990200 |
| F | -5.24626300 | -2.25976000 | -2.93196700 |
| F | -5.25180100 | 0.39749500  | -2.33682500 |
| F | -3.20770300 | 1.50965300  | -1.08259300 |
| F | -2.65236300 | 0.71199700  | 1.74647600  |
| F | -3.17370700 | -0.47363800 | 4.09711900  |
| F | -1.62331500 | -2.54433100 | 4.95477500  |
| F | 0.45292400  | -3.40037900 | 3.41008900  |
| F | 0.98660600  | -2.24278900 | 1.08971700  |
| F | -0.22319100 | 1.91674000  | 2.21914600  |
| F | 0.20097800  | 4.51444200  | 2.03152900  |
| F | 0.10439400  | 5.77559100  | -0.38286200 |
| F | -0.42216700 | 4.32986800  | -2.63357700 |
| F | -0.82571600 | 1.69492100  | -2.47465800 |
| C | 4.10492000  | -1.54264200 | -1.17186300 |
| C | 4.89929200  | -1.08373300 | -2.24197700 |
| C | 4.65556500  | -2.38123100 | -0.18051100 |
| C | 6.23552500  | -1.44722000 | -2.30402500 |
| H | 4.45388500  | -0.44307200 | -2.99662600 |
| C | 5.99023600  | -2.74460100 | -0.25752200 |
| H | 4.02014200  | -2.72505500 | 0.63051700  |
| C | 6.77365300  | -2.27606900 | -1.31628100 |
| H | 6.86009900  | -1.09253400 | -3.11683600 |
| H | 6.42633400  | -3.38622000 | 0.50052300  |
| H | 7.81997300  | -2.56129200 | -1.37185800 |
| C | 2.33048200  | 0.84110600  | 0.05298300  |
| C | 2.65066300  | 2.01144600  | -0.64237700 |
| C | 2.49214400  | 0.76232700  | 1.43612400  |
| C | 3.08878500  | 3.12479400  | 0.06467200  |
| H | 2.53702400  | 2.04585300  | -1.72247600 |
| C | 2.92589100  | 1.88546800  | 2.13735600  |
| H | 2.26847500  | -0.16566600 | 1.95454200  |
| C | 3.21464900  | 3.06488700  | 1.45486300  |
| H | 3.32678500  | 4.04213100  | -0.46535800 |
| H | 3.03641700  | 1.83752000  | 3.21598200  |
| H | 3.54677500  | 3.94027100  | 2.00465100  |

## 16

E (SMD/M06-2X/6-31G(d)) = -2821.95195238

G (SMD/M06-2X/6-31G(d)) = -2821.673523

E (SMD/M06-2X/def2-TZVP//SMD/M06-2X/6-31G(d)) = -2823.14668424

|   |            |             |             |
|---|------------|-------------|-------------|
| C | 1.90715200 | -0.24771000 | -0.70006200 |
|---|------------|-------------|-------------|

|   |             |             |             |
|---|-------------|-------------|-------------|
| C | 2.97650400  | -0.87651300 | -1.11447600 |
| O | 0.65850600  | -0.53833300 | -0.98121900 |
| B | -0.55867100 | -0.06820500 | -0.21464700 |
| C | -1.80994200 | -0.70311000 | -1.07168600 |
| C | -2.96489300 | -0.04139600 | -1.47172200 |
| C | -1.78423500 | -2.06267900 | -1.37784000 |
| C | -4.00305700 | -0.66005200 | -2.15868700 |
| C | -2.79596900 | -2.71902200 | -2.06382500 |
| C | -3.91760300 | -2.00829700 | -2.46058500 |
| C | -0.55058900 | 1.57110200  | -0.17071200 |
| C | -0.39385100 | 2.37070600  | 0.95447100  |
| C | -0.57296600 | 2.26825000  | -1.37580300 |
| C | -0.25449700 | 3.75331800  | 0.89952500  |
| C | -0.44635000 | 3.64400100  | -1.47927700 |
| C | -0.27931300 | 4.39577200  | -0.32530900 |
| C | -0.68132600 | -0.77869200 | 1.26150000  |
| C | 0.13266200  | -1.77466800 | 1.77848800  |
| C | -1.79895600 | -0.48392600 | 2.03820500  |
| C | -0.11028700 | -2.41248300 | 2.99126600  |
| C | -2.08631100 | -1.09153200 | 3.24798700  |
| C | -1.22982400 | -2.07277800 | 3.72916600  |
| F | -0.75048000 | -2.82477000 | -0.98378900 |
| F | -2.70705300 | -4.02546000 | -2.33122300 |
| F | -4.90488000 | -2.61740700 | -3.11770100 |
| F | -5.08343900 | 0.03499400  | -2.52663300 |
| F | -3.14519800 | 1.26268300  | -1.21022700 |
| F | -2.65894600 | 0.45678100  | 1.61034000  |
| F | -3.17100400 | -0.75405600 | 3.95017200  |
| F | -1.48183900 | -2.67478900 | 4.89169600  |
| F | 0.72497600  | -3.35342000 | 3.44245600  |
| F | 1.25088300  | -2.16594600 | 1.13426800  |
| F | -0.32474700 | 1.83993400  | 2.18617500  |
| F | -0.05980600 | 4.45904300  | 2.01724200  |
| F | -0.13312600 | 5.71905400  | -0.39863800 |
| F | -0.47443900 | 4.25034500  | -2.66994600 |
| F | -0.72304400 | 1.59471200  | -2.52894100 |
| C | 4.15905600  | -1.52826000 | -1.35937700 |
| C | 4.92245300  | -1.23262300 | -2.52548700 |
| C | 4.60831200  | -2.52315200 | -0.44201200 |
| C | 6.09853200  | -1.91439700 | -2.75795500 |
| H | 4.55996600  | -0.47280300 | -3.21017400 |
| C | 5.78635100  | -3.19571800 | -0.69157800 |
| H | 4.00466100  | -2.73179400 | 0.43575800  |
| C | 6.52282000  | -2.88814200 | -1.84331200 |
| H | 6.69303200  | -1.70286500 | -3.63959900 |
| H | 6.14285000  | -3.95616800 | -0.00598000 |
| H | 7.44989300  | -3.42109200 | -2.03392600 |

|   |            |             |             |
|---|------------|-------------|-------------|
| C | 2.37808100 | 0.92847300  | 0.11947900  |
| C | 2.66693800 | 2.13936000  | -0.52242200 |
| C | 2.48807600 | 0.80968100  | 1.50750200  |
| C | 3.00257500 | 3.25155100  | 0.23935200  |
| H | 2.60385900 | 2.20176100  | -1.60513600 |
| C | 2.81930000 | 1.93129000  | 2.26230200  |
| H | 2.30576500 | -0.14803500 | 1.98473100  |
| C | 3.06581900 | 3.14972600  | 1.63143300  |
| H | 3.21088200 | 4.19885100  | -0.24856200 |
| H | 2.88564200 | 1.85312300  | 3.34271600  |
| H | 3.32002700 | 4.02290900  | 2.22458800  |

**TS<sub>16-17</sub>**

E (SMD/M06-2X/6-31G(d)) = -2821.95162137

G (SMD/M06-2X/6-31G(d)) = -2821.672779

E (SMD/M06-2X/def2-TZVP//SMD/M06-2X/6-31G(d)) = -2823.14607734

|   |             |             |             |
|---|-------------|-------------|-------------|
| C | 1.64380700  | -0.51532600 | -1.07399200 |
| C | 2.80693200  | -0.93964500 | -1.34046500 |
| O | 0.37784800  | -0.47178500 | -1.27121500 |
| B | -0.68070300 | -0.02225600 | -0.25832600 |
| C | -2.07947200 | -0.18434900 | -1.09569300 |
| C | -3.10144700 | 0.75203600  | -1.19477900 |
| C | -2.34089100 | -1.40282400 | -1.71940100 |
| C | -4.28234000 | 0.52215700  | -1.89081300 |
| C | -3.50370400 | -1.67336800 | -2.42556300 |
| C | -4.48450400 | -0.69785500 | -2.51326200 |
| C | -0.32706300 | 1.51662700  | 0.16985400  |
| C | 0.03214100  | 1.96842900  | 1.43336200  |
| C | -0.29264100 | 2.49259700  | -0.82459400 |
| C | 0.39548800  | 3.28442600  | 1.70182500  |
| C | 0.05675200  | 3.81478900  | -0.60260200 |
| C | 0.40928200  | 4.21445900  | 0.67845100  |
| C | -0.81658900 | -1.06317500 | 0.99868600  |
| C | -0.16814200 | -2.27793800 | 1.16055000  |
| C | -1.79955700 | -0.79894600 | 1.94968300  |
| C | -0.44074000 | -3.15949600 | 2.20235700  |
| C | -2.10862500 | -1.64360500 | 3.00114100  |
| C | -1.42054100 | -2.84348000 | 3.12594300  |
| F | -1.44998200 | -2.40465400 | -1.63782500 |
| F | -3.69227000 | -2.86112600 | -3.00669600 |
| F | -5.61166200 | -0.93410700 | -3.18366400 |
| F | -5.22500300 | 1.46604000  | -1.95953200 |
| F | -2.99957300 | 1.95511000  | -0.60910000 |
| F | -2.49338000 | 0.34936600  | 1.86495100  |
| F | -3.05608700 | -1.32569900 | 3.88625600  |
| F | -1.69836400 | -3.67624200 | 4.12852500  |
| F | 0.23195400  | -4.30859400 | 2.31038000  |

|   |             |             |             |
|---|-------------|-------------|-------------|
| F | 0.80356000  | -2.66725900 | 0.31262900  |
| F | 0.08294300  | 1.13810700  | 2.48732900  |
| F | 0.77924100  | 3.64040300  | 2.93080900  |
| F | 0.77447700  | 5.47396700  | 0.91401300  |
| F | 0.06610800  | 4.70070900  | -1.60178500 |
| F | -0.62733300 | 2.16577200  | -2.08288700 |
| C | 4.12670800  | -1.42113800 | -1.64278900 |
| C | 4.55814800  | -2.62994100 | -1.07618200 |
| C | 4.97014800  | -0.69402800 | -2.49590400 |
| C | 5.83046000  | -3.10705300 | -1.36597800 |
| H | 3.88823100  | -3.17987700 | -0.42201000 |
| C | 6.24123600  | -1.17821600 | -2.77488600 |
| H | 4.62190000  | 0.23932000  | -2.92744000 |
| C | 6.66986400  | -2.38119500 | -2.21101000 |
| H | 6.16814400  | -4.04314300 | -0.93344300 |
| H | 6.89893800  | -0.62054100 | -3.43359800 |
| H | 7.66475300  | -2.75498300 | -2.43295200 |
| C | 2.56529100  | 0.30708800  | -0.08900400 |
| C | 2.91573300  | 1.62441800  | -0.45428700 |
| C | 2.68697500  | -0.13390200 | 1.24276300  |
| C | 3.36349800  | 2.49800800  | 0.52118100  |
| H | 2.82376300  | 1.93073800  | -1.49277500 |
| C | 3.13390200  | 0.75230700  | 2.21100800  |
| H | 2.43465200  | -1.16152600 | 1.48725400  |
| C | 3.46712300  | 2.05971100  | 1.84786500  |
| H | 3.63247600  | 3.51692700  | 0.26261600  |
| H | 3.22540400  | 0.43254100  | 3.24323500  |
| H | 3.81743500  | 2.75055500  | 2.60903800  |

## 17

E (SMD/M06-2X/6-31G(d)) = -614.465147024

G (SMD/M06-2X/6-31G(d)) = -614.306466

E (SMD/M06-2X/def2-TZVP//SMD/M06-2X/6-31G(d)) = -614.697058988

|   |             |             |             |
|---|-------------|-------------|-------------|
| C | 0.00002800  | 2.15567600  | 0.00015800  |
| C | -0.00005500 | 0.82852200  | 0.00024500  |
| O | 0.00025500  | 3.32003600  | 0.00001400  |
| C | 1.31443600  | 0.13602900  | 0.03176200  |
| C | 2.44223100  | 0.69719500  | -0.58184400 |
| C | 1.45004200  | -1.08749200 | 0.70190800  |
| C | 3.67761800  | 0.06032700  | -0.51279900 |
| H | 2.34862700  | 1.63452100  | -1.12526800 |
| C | 2.68290800  | -1.73093200 | 0.75102800  |
| H | 0.58690300  | -1.53194300 | 1.18879700  |
| C | 3.80297400  | -1.15947600 | 0.14886400  |
| H | 4.54052600  | 0.51339400  | -0.99174400 |
| H | 2.76921200  | -2.67998800 | 1.27188200  |
| H | 4.76398700  | -1.66251300 | 0.19239400  |

|   |             |             |             |
|---|-------------|-------------|-------------|
| C | -1.31454300 | 0.13610500  | -0.03159700 |
| C | -2.44252900 | 0.69734400  | 0.58154300  |
| C | -1.44986700 | -1.08758600 | -0.70147300 |
| C | -3.67787700 | 0.06038800  | 0.51230100  |
| H | -2.34921500 | 1.63483700  | 1.12474800  |
| C | -2.68269700 | -1.73106000 | -0.75087600 |
| H | -0.58655400 | -1.53215100 | -1.18796200 |
| C | -3.80298700 | -1.15955100 | -0.14914500 |
| H | -4.54089600 | 0.51352600  | 0.99098000  |
| H | -2.76878000 | -2.68023100 | -1.27155700 |
| H | -4.76394000 | -1.66268300 | -0.19283200 |

### 18

E (SMD/M06-2X/6-31G(d)) = -669.824876067

G (SMD/M06-2X/6-31G(d)) = -669.648694

E (SMD/M06-2X/def2-TZVP//SMD/M06-2X/6-31G(d)) = -670.074915671

|   |             |             |             |
|---|-------------|-------------|-------------|
| N | -0.07207000 | -0.25071900 | 0.00000200  |
| C | -1.16930600 | -0.91399300 | 0.00002100  |
| H | -1.16358000 | -2.00998400 | 0.00003000  |
| C | -2.48170400 | -0.26774400 | 0.00001000  |
| C | -3.62549600 | -1.07479200 | 0.00001600  |
| C | -2.61401000 | 1.12856900  | -0.00000700 |
| C | -4.89077400 | -0.49590200 | 0.00000400  |
| H | -3.51461600 | -2.15624500 | 0.00002900  |
| C | -3.87706200 | 1.70330900  | -0.00001800 |
| H | -1.72019500 | 1.74459700  | -0.00001100 |
| C | -5.01539100 | 0.89199900  | -0.00001300 |
| H | -5.77622200 | -1.12360100 | 0.00000800  |
| H | -3.98154400 | 2.78378900  | -0.00003200 |
| H | -6.00177500 | 1.34621900  | -0.00002300 |
| C | 1.11401500  | -1.04287000 | -0.00000300 |
| O | 1.12059700  | -2.25918200 | -0.00001600 |
| C | 2.37692400  | -0.25137600 | 0.00000000  |
| C | 2.37294800  | 1.14702900  | 0.00001400  |
| C | 3.59312200  | -0.94451500 | -0.00001200 |
| C | 3.57849200  | 1.84366400  | 0.00001400  |
| H | 1.42807300  | 1.67807300  | 0.00002200  |
| C | 4.79393100  | -0.24665600 | -0.00001100 |
| H | 3.57838700  | -2.02980800 | -0.00002200 |
| C | 4.78685700  | 1.14945900  | 0.00000200  |
| H | 3.57479500  | 2.92929800  | 0.00002400  |
| H | 5.73565000  | -0.78668500 | -0.00002100 |
| H | 5.72545700  | 1.69574300  | 0.00000200  |

### TS<sub>17-19</sub>

E (SMD/M06-2X/6-31G(d)) = -1284.28070958

G (SMD/M06-2X/6-31G(d)) = -1283.923545

E (SMD/M06-2X/def2-TZVP//SMD/M06-2X/6-31G(d)) = -1284.7584264

|   |             |             |             |
|---|-------------|-------------|-------------|
| C | 0.08469100  | 0.32125600  | 1.55178600  |
| C | 0.79940600  | 1.17764800  | 0.74635200  |
| O | 0.25440000  | -0.49096700 | 2.42183900  |
| C | 0.15863100  | 2.15420700  | -0.16430700 |
| C | -0.90739000 | 2.97214100  | 0.24278500  |
| C | 0.62160200  | 2.29801700  | -1.48408700 |
| C | -1.50631700 | 3.86818600  | -0.63914400 |
| H | -1.26194800 | 2.90544500  | 1.26689800  |
| C | 0.03329000  | 3.20271800  | -2.36316900 |
| H | 1.45987900  | 1.69043800  | -1.81827300 |
| C | -1.04021200 | 3.98923300  | -1.94689600 |
| H | -2.33178700 | 4.48571500  | -0.29624500 |
| H | 0.41119600  | 3.28896500  | -3.37802100 |
| H | -1.50231700 | 4.69388700  | -2.63173200 |
| C | 2.27559100  | 1.11998400  | 0.84926000  |
| C | 3.05946900  | 2.24757500  | 0.54113400  |
| C | 2.95508300  | -0.05303400 | 1.23022900  |
| C | 4.44841100  | 2.20559900  | 0.60949000  |
| H | 2.56953000  | 3.17218800  | 0.25002000  |
| C | 4.34420600  | -0.09146500 | 1.29924400  |
| H | 2.38481400  | -0.94378700 | 1.47283700  |
| C | 5.10386800  | 1.03531600  | 0.98883200  |
| H | 5.02063100  | 3.09767800  | 0.36958300  |
| H | 4.83521800  | -1.01633100 | 1.59019300  |
| H | 6.18790700  | 1.00246300  | 1.04197200  |
| N | -1.14129900 | -1.47243500 | -0.07179600 |
| C | -0.11088000 | -1.22347800 | -0.80267900 |
| H | -0.06323000 | -0.30504200 | -1.39412100 |
| C | 1.00539800  | -2.14796500 | -0.91717800 |
| C | 2.06354900  | -1.82001500 | -1.77395400 |
| C | 1.07891400  | -3.29273000 | -0.10900800 |
| C | 3.18704300  | -2.63717400 | -1.83199000 |
| H | 2.00129100  | -0.92119900 | -2.38226500 |
| C | 2.20287400  | -4.10345800 | -0.16970600 |
| H | 0.25799100  | -3.52270000 | 0.56393200  |
| C | 3.25487600  | -3.77570300 | -1.03038500 |
| H | 4.00994300  | -2.38434600 | -2.49248600 |
| H | 2.26813800  | -4.98857800 | 0.45484000  |
| H | 4.13431300  | -4.41143000 | -1.07068300 |
| C | -1.96616900 | -0.57139800 | 0.46126400  |
| O | -1.51960600 | 0.38809700  | 1.17383400  |
| C | -3.42227600 | -0.73485800 | 0.34433300  |
| C | -3.94753400 | -1.82030300 | -0.36638100 |
| C | -4.27269700 | 0.21544500  | 0.92162200  |
| C | -5.32414000 | -1.95456300 | -0.49493100 |
| H | -3.27631000 | -2.55329500 | -0.80294300 |

|   |             |             |             |
|---|-------------|-------------|-------------|
| C | -5.64800500 | 0.07513600  | 0.78670900  |
| H | -3.85075100 | 1.05480700  | 1.46442100  |
| C | -6.17233100 | -1.00814000 | 0.08066800  |
| H | -5.73694500 | -2.79669100 | -1.04064100 |
| H | -6.31251500 | 0.80873800  | 1.23133600  |
| H | -7.24801400 | -1.11597100 | -0.02081200 |

**19**

E (SMD/M06-2X/6-31G(d)) = -1284.34896984

G (SMD/M06-2X/6-31G(d)) = -1283.983889

E (SMD/M06-2X/def2-TZVP//SMD/M06-2X/6-31G(d)) = -1284.82122034

|   |             |             |             |
|---|-------------|-------------|-------------|
| C | -0.01018500 | 0.21414300  | -1.43035700 |
| C | -0.71482300 | 0.60343600  | -0.13898700 |
| O | -0.41986300 | 0.33925500  | -2.54925400 |
| C | -0.12928400 | 1.99463600  | 0.19010100  |
| C | -0.31808700 | 3.01743400  | -0.74865900 |
| C | 0.54503300  | 2.28676600  | 1.37746800  |
| C | 0.15307300  | 4.30231600  | -0.50634100 |
| H | -0.84689400 | 2.80194700  | -1.67396300 |
| C | 1.01346000  | 3.57875500  | 1.62130800  |
| H | 0.72248500  | 1.51788600  | 2.12161200  |
| C | 0.82147000  | 4.58804300  | 0.68391600  |
| H | -0.00392400 | 5.08083000  | -1.24663900 |
| H | 1.53353000  | 3.78891800  | 2.55099000  |
| H | 1.18969100  | 5.59102100  | 0.87699300  |
| C | -2.23378800 | 0.67593400  | -0.28523000 |
| C | -2.95473700 | 1.49743200  | 0.58687900  |
| C | -2.94088300 | -0.14788200 | -1.16806900 |
| C | -4.34791800 | 1.50352000  | 0.57482300  |
| H | -2.42449200 | 2.13905000  | 1.28527300  |
| C | -4.33285400 | -0.13483800 | -1.18620300 |
| H | -2.40898300 | -0.81292200 | -1.83923200 |
| C | -5.04264000 | 0.68965200  | -0.31581100 |
| H | -4.88701100 | 2.14865400  | 1.26212800  |
| H | -4.86259000 | -0.77913500 | -1.88152400 |
| H | -6.12842300 | 0.69590800  | -0.33092700 |
| N | 1.09531100  | -0.66465000 | 1.02887300  |
| C | -0.34241000 | -0.46275000 | 0.94325300  |
| H | -0.67859500 | -0.05682700 | 1.90299400  |
| C | -1.05979700 | -1.79101100 | 0.74377100  |
| C | -2.22992200 | -2.04728400 | 1.46227300  |
| C | -0.60682300 | -2.74026700 | -0.17539300 |
| C | -2.94592300 | -3.22309500 | 1.25675900  |
| H | -2.58895300 | -1.30998600 | 2.17644000  |
| C | -1.32387200 | -3.91714300 | -0.38413400 |
| H | 0.31045700  | -2.57576500 | -0.73517000 |
| C | -2.49549900 | -4.16051500 | 0.32892600  |



|   |             |             |             |
|---|-------------|-------------|-------------|
| H | -3.85498700 | -3.40666000 | 1.82156200  |
| H | -0.96136800 | -4.64552100 | -1.10319900 |
| H | -3.05174500 | -5.07869700 | 0.16608500  |
| C | 1.78604900  | -0.52943000 | -0.02037800 |
| O | 1.27521200  | -0.23475100 | -1.27223700 |
| C | 3.25498200  | -0.70645800 | -0.05600400 |
| C | 3.92266500  | -1.05790200 | 1.12287600  |
| C | 3.97776200  | -0.52247500 | -1.23823500 |
| C | 5.30162500  | -1.22255200 | 1.11670400  |
| H | 3.35009200  | -1.19841100 | 2.03364600  |
| C | 5.36038100  | -0.68844400 | -1.23734000 |
| H | 3.46280900  | -0.25079800 | -2.15284100 |
| C | 6.02344300  | -1.03778900 | -0.06356100 |
| H | 5.81596500  | -1.49535500 | 2.03294000  |
| H | 5.91845400  | -0.54388200 | -2.15708500 |
| H | 7.10153900  | -1.16712600 | -0.06639100 |
